# Supplementary material for: Bis-triazolyl BODIPYs: a simple dye with strong red-light emission
Source: Royal Society of Chemistry journal article supplement (doi:10.1039/c5ra14309h), 2015-01-01
Supplement: c5ra14309h1.pdf [file c5ra14309h1.pdf]

**Electronic Supplementary Information**

for

**Bis-triazolyle BODIPYs: a simple dye with strong red-light emission**

*Charles Guérin,<sup>a</sup> Ludivine Jean-Gérard,<sup>a</sup> Guillaume Octobre,<sup>a</sup> Simon Pascal,<sup>b</sup> Olivier Maury,<sup>b</sup>  
Guillaume Pilet,<sup>c</sup> Audrey Ledoux<sup>a</sup> and Bruno Andrioletti<sup>a,\*</sup>*

## Table of contents

|                                                                           |           |
|---------------------------------------------------------------------------|-----------|
| <b>SYNTHESES</b>                                                          | <b>3</b>  |
| Procedure for the preparation of the building block 1                     | 3         |
| General procedure for alkyl azide synthesis                               | 5         |
| General procedure for triazoles synthesis                                 | 6         |
| General procedure for pyrrole detosylation                                | 7         |
| General procedure for BODIPY synthesis                                    | 8         |
| Procedure for the preparation of the water-soluble BODIPY                 | 10        |
| <b>FLUORESCENCE MEASUREMENTS</b>                                          | <b>13</b> |
| <b>X-RAY DATA</b>                                                         | <b>14</b> |
| <b>CELL CULTURE, STAINING AND EPIFLUORESCENCE MICROSCOPY OBSERVATIONS</b> | <b>16</b> |
| <b>NMR SPECTRA</b>                                                        | <b>18</b> |
| <b>HRMS DATA</b>                                                          | <b>34</b> |

## Syntheses of compounds

### General information

All reactions requiring inert conditions were performed under argon atmosphere using Schlenk techniques. THF was freshly distilled over sodium/benzophenone. Anhydrous dichloromethane and dimethylformamide were purchased from Sigma or Carlo Erba. Benzaldehyde was distilled before use. Other reagents and solvents were obtained from commercial suppliers (Aldrich, Sigma, Fluka, Acros Organics, Fisher Scientific) and used without further purification.

Analytical TLC was performed on ready-made plates coated with silica gel on aluminum (Merck 60 F254). Products were visualized by ultraviolet light or treatment with permanganate stain followed by gentle heating. Flash chromatography was performed using silica gel (60 Å, particle size 40-63µm).

NMR spectra were recorded on a Bruker AV 500 MHz, Bruker AV 400 MHz or Bruker DRX 300 MHz spectrometer with a QNP probe.  $^1\text{H}$  and  $^{13}\text{C}$  chemical shifts are reported in parts per million (ppm) downfield to tetramethylsilane using the residual solvent signal as internal standard.  $^{19}\text{F}$  spectra are referenced to  $\text{CFCl}_3$ . Proton ( $^1\text{H}$ ) NMR information is given in the following format: multiplicity (s, singlet; d, doublet; t, triplet; q, quartet; m, multiplet; b, broad signal), coupling constant(s) (J) in Hertz (Hz), number of protons. Melting point were measured on previously calibrated Kofler bench. High resolution mass spectrometry spectra are recorded on BrukerMicrOQTOF-Q II XL.

### Procedure for the preparation of the building block 1

#### Preparation of 1-tosyl-1H-pyrrole-2-carbaldehyde

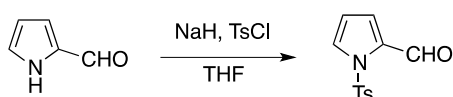

Pyrrole-2-carboxaldehyde (10.0 g, 105 mmol, 1.00 eq) was added portionwise to a stirred suspension of sodium hydride (5.30 g, 60% dispersion in oil washed three times with pentane, 1.25 eq) in 300 mL anhydrous THF under inert atmosphere. After 15 min of stirring at room temperature, a solution of tosyl chloride (22.5 g, 116 mmol, 1.10 eq) in 100 mL THF was added, and the resulting purple mixture was stirred overnight. Water (100 mL) was added to dissolve the precipitate. Then the mixture was extracted twice with dichloromethane (500 mL + 100 mL). The organic layer was washed with saturated aqueous  $\text{NaHCO}_3$ ,  $\text{NH}_4\text{Cl}$  and brine (400 mL of each), dried over  $\text{Na}_2\text{SO}_4$ , and concentrated under vacuum to afford the tosylated compound as a brownish solid (23.4 g, 89%). The product is pure enough to be used for the next step (> 96%  $^1\text{H}$  NMR).

$^1\text{H}$  NMR (300 MHz,  $\text{CDCl}_3$ ) :  $\delta$  = 2.49 (s, 3H), 6.38 (dd,  $^3J$  = 3.4 Hz,  $^3J$  = 3.4 Hz, 1H), 7.13 (dd,  $^3J$  = 3.7 Hz,  $^4J$  = 1.8 Hz, 1H), 7.30 (d,  $^3J$  = 8.1 Hz, 2H), 7.60 (dd,  $^3J$  = 3.1 Hz,  $^4J$  = 1.8 Hz, 1H), 7.78 (d,  $^3J$  = 8.3 Hz, 2H), 9.95 (s, 1H).  $^{13}\text{C}$  NMR (75.3 MHz,  $\text{CDCl}_3$ ):  $\delta$  = 21.7, 112.5, 124.6, 127.5, 129.5, 130.2, 133.5,

135.2, 146.0, 179.0.  $[M+H]^+$  calcd. for  $C_{12}H_{12}NO_2S$  : 250.0538; found : 250.0534. MP (Kofler): 97°C. IR ( $cm^{-1}$ ): 3125 (w), 1665 (s), 1420 (s), 1362 (s).

Spectroscopic data were in agreement with previous literature report.<sup>1</sup>

### Preparation of 2-(2,2-dibromovinyl)-1-tosyl-1H-pyrrole

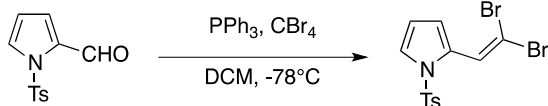

A solution of  $CBr_4$  (58.5 g, 176 mmol, 2.0 eq) in anhydrous  $CH_2Cl_2$  (220 mL) was cooled down to  $0^\circ C$  and treated with  $PPh_3$  (92.5 g, 353 mmol, 4.0 eq) in anhydrous  $CH_2Cl_2$  (220 mL). The orange resulting mixture was stirred for 30 min at  $0^\circ C$ , then cooled down to  $-78^\circ C$ . 1-tosyl-1H-pyrrole-2-carbaldehyde (22.0 g, 88.2 mmol, 1.0 eq) in anhydrous  $CH_2Cl_2$  (220 mL) was added dropwise. After stirring for 10 min at  $-78^\circ C$ , the mixture was allowed to warm up over a period of 15 min and was then stirred for 1 h at  $0^\circ C$ . Triphenylphosphine oxide and black impurities precipitated by addition of  $Et_2O$  (2 L) were filtered off over a Celite® plug and rinsed thoroughly with  $Et_2O$  (~200 mL). The clear yellow solution was washed with water (2 L), saturated aqueous  $NaHCO_3$ ,  $NH_4Cl$ ,  $NaCl$  (1 L of each), dried over  $MgSO_4$  and concentrated under reduced pressure to afford ~68 g of a crude grey solid.

Column chromatography (silica gel, cyclohexane/ $EtOAc$  7:3) afforded an orange solid which was triturated in a small amount of  $Et_2O$  and filtered off. The dibromoalkene compound was obtained as a crystallized white-off solid (27.1 g, 76%).

$^1H$  NMR (300 MHz,  $CDCl_3$ ) :  $\delta$  = 2.41 (s, 3H), 6.30 (dd,  $^3J = 3.4$  Hz,  $^3J = 3.4$  Hz, 1H), 6.88 (ddd,  $^3J = 3.6$  Hz,  $^4J = 1.6$  Hz,  $^4J = 0.9$  Hz, 1H), 7.31 (d,  $^3J = 8.0$  Hz, 2H), 7.38 (dd,  $^3J = 3.3$  Hz,  $^4J = 1.6$  Hz, 1H), 7.66 (d,  $^3J = 8.4$  Hz, 2H), 7.87 (s, 1H).  $^{13}C$  NMR (75.3 MHz,  $CDCl_3$ ):  $\delta$  = 21.8, 90.5, 112.4, 117.1, 123.8, 126.4, 127.1, 129.4, 130.2, 135.6, 145.6.  $[M+H]^+$  calcd. for  $C_{13}H_{12}BrNO_2S$ : 405.8935; found: 405.8924. MP (Kofler): 89°C. IR ( $cm^{-1}$ ): 3063 (w), 1593 (m), 1450 (m), 1362 (m).

Spectroscopic data were in agreement with previous literature report.<sup>2</sup>

### Preparation of 2-ethynyl-1-tosyl-1H-pyrrole 1

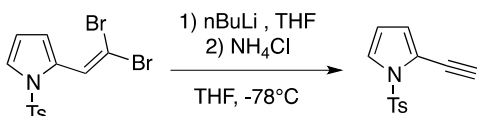

A solution of 2-(2,2-dibromovinyl)-1-tosyl-1H-pyrrole (5.06 g, 12.5 mmol, 1.00 eq) in anhydrous THF (55 mL) was cooled down to  $-78^\circ C$ .  $nBuLi$  (18.8 mL, 1.46M in hexane, 27.5 mmol, 2.20 eq) was then added dropwise over 25 min. The resulting solution was stirred for 90 min at  $-78^\circ C$ . The reaction was quenched by a quick addition of saturated aqueous  $NH_4Cl$  solution (30 mL). The mixture was then allowed to warm to room temperature. The organic layer was washed with saturated aqueous  $NH_4Cl$ , water and brine (120 mL each), dried over  $Na_2SO_4$  and evaporated. Column chromatography (silica gel, cyclohexane/ $EtOAc$  95:5) yielded pyrrolylethyne 1 (1.96 g, 64%, 96% purity  $^1H$  NMR) as a yellow solid.

$^1\text{H}$  NMR (300 MHz,  $\text{CDCl}_3$ ):  $\delta$  = 2.41 (s, 3H), 3.43 (s, 1H), 6.20 (dd,  $^3J$  = 3.4 Hz,  $^3J$  = 3.4 Hz, 1H), 6.58 (dd,  $^3J$  = 3.5 Hz,  $^4J$  = 1.6 Hz, 1H), 7.27-7.39 (m, 3H), 7.86 (d,  $^3J$  = 8.3 Hz, 2H).  $^{13}\text{C}$  NMR (75.3 MHz,  $\text{CDCl}_3$ ):  $\delta$  = 21.8, 74.0, 83.4, 111.7, 114.4, 122.6, 123.8, 128.0, 130.0, 135.4, 145.6.  $[\text{M}+\text{H}]^+$  calcd. for  $\text{C}_{13}\text{H}_{12}\text{NO}_2\text{S}$  : 246.0589; found : 246.0584. MP (Kofler): 88°C. IR ( $\text{cm}^{-1}$ ): 3306 (m), 1593 (m), 1445 (m), 1364 (m).

Spectroscopic data were in agreement with previous literature report.<sup>2</sup>

### General procedure for alkyl azide synthesis

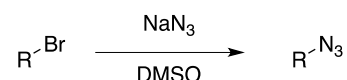

Sodium azide (1.1 eq) was dissolved in DMSO (2.2 mL/mmol alkyl bromide). 1-Alkylbromide (1.0 eq) was then added to the mixture and stirred overnight at room temperature.

Water (2 mL/mL DMSO) was added and the mixture was extracted twice with  $\text{Et}_2\text{O}$ . The organic layer was dried over  $\text{Na}_2\text{SO}_4$  and  $\text{Et}_2\text{O}$  was carefully distilled-off under vacuum to afford 1-azidoalkane.

### Characterization of 1-azidohexane

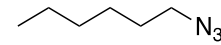 (60.5 mmol starting material, yellowish oil, 91% yield)  
 $^1\text{H}$  NMR (300 MHz,  $\text{CDCl}_3$ ):  $\delta$  = 0.89 (t,  $^3J$  = 7.0 Hz, 3H), 1.22-1.43 (m, 6H), 1.52-1.68 (m, 2H), 3.24 (t,  $^3J$  = 7.0 Hz, 2H).  $^{13}\text{C}$  NMR (75.3 MHz,  $\text{CDCl}_3$ ):  $\delta$  = 14.0, 22.6, 26.5, 28.9, 31.4, 51.6. IR ( $\text{cm}^{-1}$ ): 2930 (w), 2087 (s).

Spectroscopic data were in agreement with previous literature report.<sup>3</sup>

### Characterization of 6-azidohex-1-ene

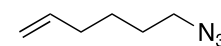 (30.7 mmol starting material, yellowish oil, 82% yield)  
 $^1\text{H}$  NMR (300 MHz,  $\text{CDCl}_3$ ):  $\delta$  = 1.42-1.52 (m, 2H), 1.57-1.66 (m, 2H), 2.04-2.12 (m, 2H), 3.27 (t,  $^3J$  = 7.2 Hz, 2H), 4.95-5.05 (m, 2H), 5.79 (ddt,  $^EJ$  = 17.0 Hz,  $^ZJ$  = 10.1 Hz,  $^3J$  = 6.6 Hz, 1H).  $^{13}\text{C}$  NMR (75.3 MHz,  $\text{CDCl}_3$ ):  $\delta$  = 26.0, 28.4, 33.3, 51.5, 115.1, 138.3. IR ( $\text{cm}^{-1}$ ): 2936 (w), 2089 (s), 1641 (w).

Spectroscopic data were in agreement with previous literature report.<sup>4</sup>

## General procedure for triazoles synthesis

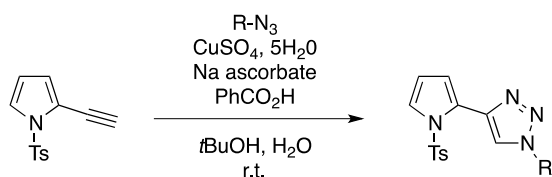

To a solution of  $CuSO_4 \cdot 5H_2O$  (1.0 mol%), sodium ascorbate (2.0 mol%), and benzoic acid (10 mol%) in  $tBuOH/H_2O$  (1:2 v/v, 1 mL/mmol alkyne) was added a mixture of **1** (1.0 eq) and alkyl azide (1.1 eq) at room temperature.<sup>5</sup> The mixture was stirred vigorously for 30 min, until completion of the reaction followed by TLC (cyclohexane/EtOAc 8:2).

$CH_2Cl_2$  was then added to dissolve the crude product. The organic layer was washed 3 times with  $H_2O$ , brine and dried over anhydrous  $Na_2SO_4$ . Removal of the solvent yielded a residue, which was purified by a short chromatography (silica gel, cyclohexane/EtOAc 8:2).

### Characterization of 1-hexyl-4-(1-tosyl-1H-pyrrol-2-yl)-1H-1,2,3-triazole **2a**

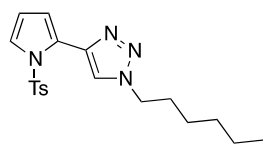

**2a** (12.2 mmol starting material, yellowish oil, 99% yield)

$^1H$  NMR (400 MHz,  $CDCl_3$ ) :  $\delta$  = 0.85-0.92 (m, 3H), 1.23-1.41 (m, 6H), 1.88-1.99 (m, 2H), 2.31 (s, 3H), 4.39 (t,  $^3J = 7.2$  Hz, 2H), 6.34 (dd,  $^3J = 3.3$  Hz,  $^3J = 3.3$  Hz, 1H), 6.63 (dd,  $^3J = 3.3$  Hz,  $^4J = 1.7$  Hz, 1H), 7.10-7.17 (m, 2H), 7.35-7.40 (m, 2H), 7.42 (dd,  $^3J = 3.2$  Hz,  $^4J = 1.7$  Hz, 1H), 7.90 (s, 1H).  $^{13}C$  NMR (100 MHz,  $CDCl_3$ ) :  $\delta$  = 14.0, 21.6, 22.5, 26.2, 30.4, 31.2, 50.5, 112.6, 117.2, 124.1, 124.6, 125.4, 126.9, 129.9, 135.4, 138.3, 145.2. HR-MS (ESI<sup>+</sup>) :  $[M+H]^+$  calcd. for  $C_{19}H_{25}N_4O_2S$  : 373.1693; found : 373.1696. IR ( $cm^{-1}$ ): 2927 (w), 1597 (w), 1366 (m), 1190 (w), 1172 (s).

### Characterization of 1-(hex-5-en-1-yl)-4-(1-tosyl-1H-pyrrol-2-yl)-1H-1,2,3-triazole **2b**

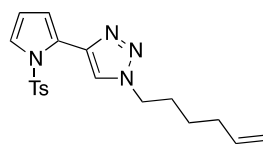

**2b** (5.19 mmol starting material, yellowish oil, 99% yield)

$^1H$  NMR (400 MHz,  $CDCl_3$ ) :  $\delta$  = 1.47 (tt,  $^3J = 7.6$  Hz,  $^3J = 7.6$  Hz, 2H), 1.97 (tt,  $^3J = 7.4$  Hz,  $^3J = 7.4$  Hz, 2H), 2.13 (dtt,  $^3J = 7.3$  Hz,  $^3J = 7.3$  Hz,  $^4J = 1.4$  Hz, 2H), 2.33 (s, 3H), 4.41 (t,  $^3J = 7.2$  Hz, 2H), 4.96-5.09 (m, 2H), 5.79 (ddt,  $^EJ = 17.3$  Hz,  $^ZJ = 10.1$  Hz,  $^3J = 6.8$  Hz, 1H), 6.35 (dd,  $^3J = 3.4$  Hz,  $^3J = 3.4$  Hz, 1H), 6.64 (dd,  $^3J = 3.4$  Hz,  $^4J = 1.8$  Hz, 1H), 7.12-7.19 (m, 2H), 7.34-7.41 (m, 2H), 7.43 (dd,  $^3J = 3.3$  Hz,  $^4J = 1.8$  Hz, 1H), 7.91 (s, 1H).  $^{13}C$  NMR (100 MHz,  $CDCl_3$ ) :  $\delta$  = 21.5, 25.5, 29.7, 33.0, 50.1, 112.5, 115.3, 117.1, 124.0, 124.5, 125.2, 126.8, 129.8, 135.3, 137.7, 138.2, 145.1. HR-MS (ESI<sup>+</sup>):  $[M+H]^+$  calcd. for  $C_{19}H_{23}N_4O_2S$  : 371.1536; found : 371.1546. IR ( $cm^{-1}$ ): 2926 (w), 1639 (w), 1595 (w), 1363 (m), 1190 (m).

## General procedure for pyrrole detosylation

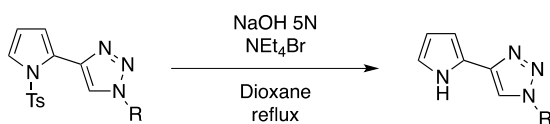

To a solution of **2** (1.55 g, 4.15 mmol, 1.0 eq) in 1,4-dioxane (4 mL/mmol of **2**) were added NaOH 5N (36 eq) and tetrabutylammonium bromide (5 mol%). The biphasic solution was heated under reflux for 40 hours with vigorous stirring.

After completion of the reaction, the mixture was diluted by addition of Et<sub>2</sub>O and water. The organic layer was collected, washed twice with aqueous NaHCO<sub>3</sub>, brine, dried over Na<sub>2</sub>SO<sub>4</sub> and concentrated under vacuum. The oily residue was precipitated by addition of pentane and the suspension was concentrated to dryness to afford **3** as a white partially crystallized solid which was used in the next step without further purification.

### Characterization of 1-hexyl-4-(1H-pyrrol-2-yl)-1H-1,2,3-triazole **3a**

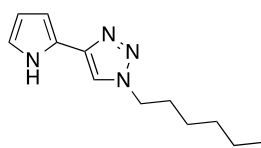

**3a** (4.15 mmol starting material, white-off solid, 92% yield)

<sup>1</sup>H NMR (400 MHz, CDCl<sub>3</sub>) : δ = 0.82-0.94 (m, 3H), 1.24-1.40 (m, 6H), 1.87-1.98 (tt, <sup>3</sup>J = 7.3 Hz, <sup>3</sup>J = 7.3 Hz, 2H), 4.35 (t, <sup>3</sup>J = 7.2 Hz, 2H), 6.26 (ddd, <sup>3</sup>J = 3.6 Hz, <sup>3</sup>J = 2.7 Hz, <sup>4</sup>J = 2.7 Hz, 1H), 6.39 (ddd, <sup>3</sup>J = 3.6 Hz, <sup>4</sup>J = 2.5 Hz, <sup>4</sup>J = 1.4 Hz, 1H), 6.90 (ddd, <sup>3</sup>J = 2.7 Hz, <sup>3</sup>J = 2.7 Hz, <sup>4</sup>J = 1.5 Hz, 1H), 7.59 (s, 1H), 9.88 (bs, 1H). <sup>13</sup>C NMR (100 MHz, CDCl<sub>3</sub>) : δ = 14.1, 22.5, 26.2, 30.3, 31.3, 50.6, 105.8, 109.4, 117.9, 118.8, 122.8, 141.9. HR-MS (ESI<sup>+</sup>) : [M+H]<sup>+</sup> calcd. for C<sub>12</sub>H<sub>19</sub>N<sub>4</sub> : 219.1604; found : 219.1599. MP (Kofler): 97°C. IR (cm<sup>-1</sup>) : 3192 (m), 2957 (m), 2930 (m), 1620 (m), 1523 (m), 1362 (m), 1215 (m).

### Characterization of 1-(hex-5-en-1-yl)-4-(1H-pyrrol-2-yl)-1H-1,2,3-triazole **3b**

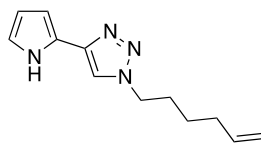

**3b** (4.75 mmol starting material, white-off solid, 90% yield)

<sup>1</sup>H NMR (400 MHz, CDCl<sub>3</sub>) : δ = 1.44 (tt, <sup>3</sup>J = 7.6 Hz, <sup>3</sup>J = 7.6 Hz, 2H), 1.94 (tt, <sup>3</sup>J = 7.4 Hz, <sup>3</sup>J = 7.4 Hz, 2H), 2.10 (dt, <sup>3</sup>J = 7.3 Hz, <sup>3</sup>J = 7.3 Hz, <sup>4</sup>J = 1.4 Hz, 2H), 4.36 (t, <sup>3</sup>J = 7.2 Hz, 2H), 4.98 (ddt, <sup>2</sup>J = 10.1 Hz, <sup>2</sup>J = 2.0 Hz, <sup>4</sup>J = 1.3 Hz, 1H), 5.02 (ddt, <sup>E</sup>J = 17.1 Hz, <sup>2</sup>J = 2.0 Hz, <sup>4</sup>J = 1.6 Hz, 1H), 5.76 (ddt, <sup>E</sup>J = 17.1 Hz, <sup>Z</sup>J = 10.3 Hz, <sup>3</sup>J = 6.7 Hz, 1H), 6.26 (ddd, <sup>3</sup>J = 3.4 Hz, <sup>3</sup>J = 2.7 Hz, <sup>4</sup>J = 2.7 Hz, 1H), 6.39 (ddd, <sup>3</sup>J = 3.5 Hz, <sup>4</sup>J = 2.5 Hz, <sup>4</sup>J = 1.4 Hz, 1H), 6.90 (ddd, <sup>3</sup>J = 2.7 Hz, <sup>3</sup>J = 2.7 Hz, <sup>4</sup>J = 1.4 Hz, 1H), 7.59 (s, 1H), 9.92 (bs, 1H). <sup>13</sup>C NMR (100 MHz, CDCl<sub>3</sub>) : δ = 25.7, 29.7, 33.1, 50.3, 105.8, 109.4, 115.4, 117.8, 118.8, 122.8, 137.8, 142.0. HR-MS (ESI<sup>+</sup>) : [M+H]<sup>+</sup> calcd. for C<sub>12</sub>H<sub>17</sub>N<sub>4</sub> : 217.1448; found : 217.1456. MP (Kofler): 96°C. IR (cm<sup>-1</sup>): 3179 (m), 3130 (m), 2938 (m), 1639 (m), 1622 (m); 1523 (m), 1356 (m), 1217 (m).

## General procedure for BODIPY synthesis

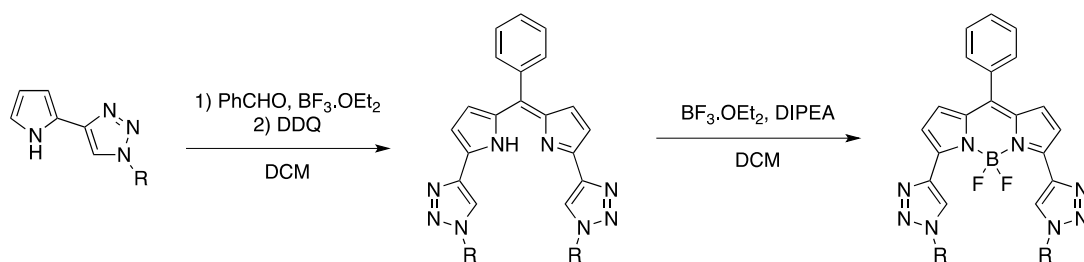

**3** (2.0 eq) was dissolved in anhydrous DCM (13 mL/mmol of **3**). Benzaldehyde (1.1 eq) and few drops of BF<sub>3</sub>·OEt<sub>2</sub> were added, and the flask was capped and stirred for 24 hours. The reaction was monitored by TLC. After full consumption of **3**, DDQ (1.2 eq) was poured into the mixture, which turned dark immediately and stirred for 2 hours. The dark purple slurry was diluted by additional DCM, and washed 3 times with saturated aqueous NaHCO<sub>3</sub>. The organic layer was then washed with water, brine, dried over Na<sub>2</sub>SO<sub>4</sub> and concentrated to dryness.

Crude product was purified by silica gel column chromatography using EtOAc/cyclohexane (40:60) as eluent to afford the dipyrromethene (see NMR p 8, 21, 22) which was dissolved in dry DCM (30 mL/mmol dipyrromethene) and anhydrous DIPEA (6.0 eq). BF<sub>3</sub>·OEt<sub>2</sub> (9.0 eq) was added dropwise and the mixture was stirred under inert atmosphere at room temperature for 2 h.<sup>6</sup>

The fluorescent mixture was diluted by additional DCM, and neutralized by saturated aqueous NaHCO<sub>3</sub>. Neutralization was repeated twice, then organic layer was collected, dried over Na<sub>2</sub>SO<sub>4</sub> and concentrated to dryness. The crude was purified by silica gel column chromatography with EtOAc/cyclohexane (4:6) as eluent.

### Characterization of (Z)-1-hexyl-4-(2-((5-(1-hexyl-1H-1,2,3-triazol-4-yl)-1H-pyrrol-2-yl)(phenyl)methylene)-2H-pyrrol-5-yl)-1H-1,2,3-triazole

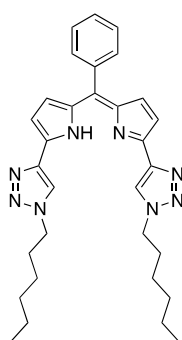

(1.16 mmol starting material, red powder, 63% yield)

<sup>1</sup>H NMR (400 MHz, Acetone-d<sub>6</sub>): δ = 0.80-0.94 (m, 6H), 1.24-1.49 (m, 12H), 1.94-2.10 (m, 4H), 4.55 (t, <sup>3</sup>J = 7.2 Hz, 4H), 6.64 (d, <sup>3</sup>J = 4.2 Hz, 2H), 6.89 (d, <sup>3</sup>J = 4.2 Hz, 2H), 7.53-7.59 (m, 5H), 8.51 (s, 2H). <sup>13</sup>C NMR (100 MHz, CDCl<sub>3</sub>): δ = 14.1, 22.6, 26.3, 30.4, 31.3, 50.7, 116.1, 121.5, 127.8, 129.0, 129.5, 131.0, 137.3, 139.6, 141.7, 142.8, 146.0. HR-MS (ESI<sup>+</sup>): [M+H]<sup>+</sup> calcd. for C<sub>31</sub>H<sub>39</sub>N<sub>8</sub>: 523.3292; found: 523.3279. MP (Kofler): 159°C. IR (cm<sup>-1</sup>): 2922 (m), 1589 (s), 1539 (s), 1319 (s), 1223 (s).



**Characterization of (Z)-1-(hex-5-en-1-yl)-4-(2-((5-(1-(hex-5-en-1-yl)-1H-1,2,3-triazol-4-yl)-1H-pyrrol-2-yl) (phenyl)methylene)-2H-pyrrol-5-yl)-1H-1,2,3-triazole**

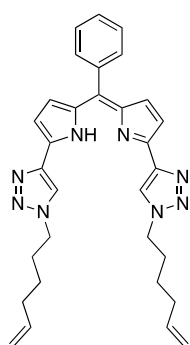

(3.24 mmol starting material, red powder, 69% yield)

$^1\text{H}$  NMR (400 MHz,  $\text{CDCl}_3$ ) :  $\delta$  = 1.49 (tt,  $^3J = 7.6$  Hz,  $^3J = 7.6$  Hz, 4H), 2.01 (tt,  $^3J = 7.5$  Hz,  $^3J = 7.3$  Hz, 4H), 2.13 (dtt,  $^3J = 7.2$  Hz,  $^3J = 7.2$  Hz,  $^4J = 1.4$  Hz, 4H), 4.46 (t,  $^3J = 7.2$  Hz, 4H), 4.97 (ddt,  $^ZJ = 10.2$  Hz,  $^2J = 1.9$  Hz,  $^4J = 1.2$  Hz, 2H), 5.03 (ddd,  $^EJ = 17.1$  Hz,  $^2J = 1.9$  Hz,  $^4J = 1.6$  Hz, 2H), 5.77 (ddt,  $^EJ = 17.1$  Hz,  $^ZJ = 10.3$  Hz,  $^3J = 6.7$  Hz, 2H), 6.67 (d,  $^3J = 4.2$  Hz, 2H), 6.85 (d,  $^3J = 4.2$  Hz, 2H), 7.42-7.57 (m, 5H), 8.10 (s, 2H).  $^{13}\text{C}$  NMR (100 MHz,  $\text{CDCl}_3$ ) :  $\delta$  = 25.8, 29.8, 33.1, 50.5, 115.5, 116.1, 121.5, 127.8, 129.0, 129.6, 131.0, 137.2, 137.9, 139.7, 141.8, 142.9, 146.0. HR-MS (ESI<sup>+</sup>) :  $[\text{M}+\text{H}]^+$  calcd. for  $\text{C}_{31}\text{H}_{35}\text{N}_8$  : 519.2979; found : 519.2957. MP (Kofler): 179°C. IR ( $\text{cm}^{-1}$ ): 2937 (w), 1639 (w), 1587 (s), 1537 (s), 1312 (s), 1221 (s).

**Characterization of 5,5-difluoro-3,7-bis(1-hexyl-1H-1,2,3-triazol-4-yl)-10-phenyl-5H-4λ4,5λ4-dipyrrolo[1,2-c:2',1'-f][1,3,2] diazaborinin-4-ium-5-uide 4a**

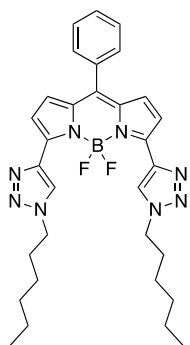

**4a** (0.191 mmol starting material, deep purple powder, 93% yield)

$^1\text{H}$  NMR (400 MHz,  $\text{CDCl}_3$ ) :  $\delta$  = 0.78-0.97 (m, 6H), 1.14-1.49 (m, 12H), 1.99 (tt,  $^3J = 7.2$  Hz,  $^3J = 7.2$  Hz, 4H), 4.44 (t,  $^3J = 7.3$  Hz, 4H), 6.90 (d,  $^3J = 4.4$  Hz, 2H), 7.35 (d,  $^3J = 4.4$  Hz, 2H), 7.47-7.60 (m, 5H), 8.51 (s, 2H).  $^{13}\text{C}$  NMR (100 MHz,  $\text{CDCl}_3$ ) :  $\delta$  = 14.0, 22.5, 26.2, 30.3, 31.2, 50.7, 120.0, 125.0 (t,  $J = 11.5$  Hz), 128.4, 130.4, 130.6, 131.0, 134.1, 136.6, 139.6, 143.0, 148.1.  $^{19}\text{F}$  NMR (160 MHz,  $\text{CDCl}_3$ ) :  $\delta$  = -144.2 (q,  $^1J = 33.6$  Hz). HR-MS (ESI<sup>+</sup>) :  $[\text{M}+\text{H}]^+$  calcd. for  $\text{C}_{31}\text{H}_{38}\text{BF}_2\text{N}_8$  : 571.3280; found : 571.3296. MP (Kofler) : 156°C. IR ( $\text{cm}^{-1}$ ): 3150 (w), 2924 (m), 1577 (s), 1543 (s), 1308 (s).

**Characterization of 5,5-difluoro-3,7-bis(1-(hex-5-en-1-yl)-1H-1,2,3-triazol-4-yl)-10-phenyl-5H-dipyrrolo[1,2-c:2',1'-f][1,3,2] diazaborinin-4-ium-5-uide 4b**

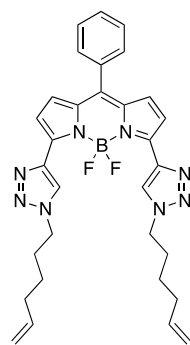

**4b** (0.171 mmol starting material, deep purple powder, 93% yield).

$^1\text{H}$  NMR (400 MHz,  $\text{CDCl}_3$ ) :  $\delta$  = 1.52 (tt,  $^3J = 7.6$  Hz,  $^3J = 7.6$  Hz, 4H), 2.03 (tt,  $^3J = 7.5$  Hz,  $^3J = 7.5$  Hz, 4H), 2.14 (dtt,  $^3J = 7.1$  Hz,  $^3J = 7.1$  Hz,  $^4J = 1.4$  Hz, 4H), 4.47 (t,  $^3J = 7.2$  Hz, 4H), 4.99 (ddt,  $^ZJ = 10.2$  Hz,  $^2J = 1.9$  Hz,  $^4J = 1.2$  Hz, 2H), 5.04 (ddd,  $^EJ = 17.1$  Hz,  $^2J = 1.9$  Hz,  $^4J = 1.6$  Hz, 2H), 5.79 (ddt,  $^EJ = 17.1$  Hz,  $^ZJ = 10.3$  Hz,  $^3J = 6.7$  Hz, 2H), 6.92 (d,  $^3J = 4.4$  Hz, 2H), 7.37 (d,  $^3J = 4.4$  Hz, 2H), 7.50-7.60 (m, 5H), 8.50 (s, 2H).  $^{13}\text{C}$  NMR (100 MHz,  $\text{CDCl}_3$ ) :  $\delta$  = 25.8, 29.8, 33.1, 50.5, 115.5, 120.1, 125.0 (t,  $J = 11.3$  Hz), 128.5, 130.4, 130.7, 131.1, 134.1, 136.6, 137.8, 139.7, 143.2, 148.1.  $^{19}\text{F}$  NMR (160 MHz,  $\text{CDCl}_3$ ):  $\delta$  = -144.2 (q,  $^1J = 33.6$  Hz). HR-MS (ESI<sup>+</sup>):  $[\text{M}+\text{H}]^+$  calcd. for

C<sub>31</sub>H<sub>34</sub>BF<sub>2</sub>N<sub>8</sub> : 567.2962; found : 567.2974. MP (Kofler): 142°C. IR (cm<sup>-1</sup>): 3100 (w), 2940 (w), 1639 (w), 1578 (m), 1537 (s), 1313 (s).

### Procedure for the preparation of the water-soluble BODIPY

#### Preparation of 3,7-bis(1-(5,6-dihydroxyhexyl)-1H-1,2,3-triazol-4-yl)-5,5-difluoro-10-phenyl-5H-dipyrrolo[1,2-c:2',1'-f][1,3,2] diazaborinin-4-ium-5-uide 5

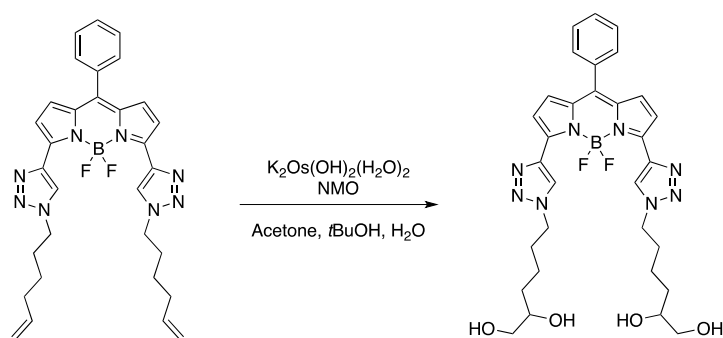

**4b** (380 mg, 671 μmol, 1.0 eq) was dissolved in a mixture of acetone (13 mL), tBuOH (720 μL) and water (720 μL). To the solution was added K<sub>2</sub>Os(OH)<sub>4</sub>O<sub>2</sub> (2.5 mg, 1.0 mol%) and N-methylmorpholine-N-oxide (275 mg, 3.5 eq).<sup>7</sup> The solution was stirred overnight at room temperature.

After full consumption of **4b**, the solvents were removed under reduced pressure and the solid was dissolved in DCM and the minimal amount of MeOH to ensure full dissolution. The organic layer was washed by aqueous Na<sub>2</sub>S<sub>2</sub>O<sub>3</sub>, dried over MgSO<sub>4</sub> and concentrated to dryness.

The crude was purified by silica gel chromatography (9:1) DCM/MeOH followed by recrystallization in IPA/cyclohexane to get **5** as a crystallized gold solid (287 mg, 67%).

<sup>1</sup>H NMR (400 MHz, DMSO-d<sub>6</sub>) : δ = 1.25-40 (m, 4H), 1.41-1.57 (m, 4H), 1.87-2.01 (m, 4H), 3.25 (ddd, <sup>2</sup>J = 10.6 Hz, <sup>3</sup>J = 5.6 Hz, <sup>3</sup>J = 5.6 Hz, 2H), 3.28 (ddd, <sup>2</sup>J = 10.6 Hz, <sup>3</sup>J = 5.6 Hz, <sup>3</sup>J = 5.6 Hz, 2H), 3.37-3.45 (m, 2H), 4.41 (d, <sup>3</sup>J = 5.0 Hz, 2H), 4.45 (t, <sup>3</sup>J = 5.6 Hz, 2H), 4.57 (t, <sup>3</sup>J = 7.1 Hz, 4H), 7.00 (d, <sup>3</sup>J = 4.5 Hz, 2H), 7.31 (d, <sup>3</sup>J = 4.5 Hz, 2H), 7.60-7.70 (m, 5H), 8.82 (s, 2H). <sup>13</sup>C NMR (100 MHz, DMSO-d<sub>6</sub>): δ = 22.2, 30.0, 32.7, 49.9, 65.9, 70.9, 119.4, 126.0 (t, J = 11.4 Hz), 128.6, 130.5, 130.6, 131.1, 133.2, 135.4, 138.0, 142.6, 147.5. <sup>19</sup>F NMR (160 MHz, DMSO-d<sub>6</sub>): δ = -143.5 (q, <sup>1</sup>J = 33.2 Hz). HR-MS (ESI<sup>+</sup>): [M+H]<sup>+</sup> calcd. for C<sub>31</sub>H<sub>38</sub>BF<sub>2</sub>N<sub>8</sub>O<sub>4</sub> : 635.3072; found : 635.3085. MP (Kofler): 144°C. IR (cm<sup>-1</sup>): 3325 (b), 2928 (w), 1578 (m), 1537 (s), 1325 (s).

**Preparation of Sodium 3,7-bis(1-(5,6-bis(sulfonatooxy)hexyl)-1H-1,2,3-triazol-4-yl)-5,5-difluoro-10-phenyl-5H-dipyrrolo[1,2-c:2',1'-f][1,3,2]diazaborinin-4-ium-5-uide 6**

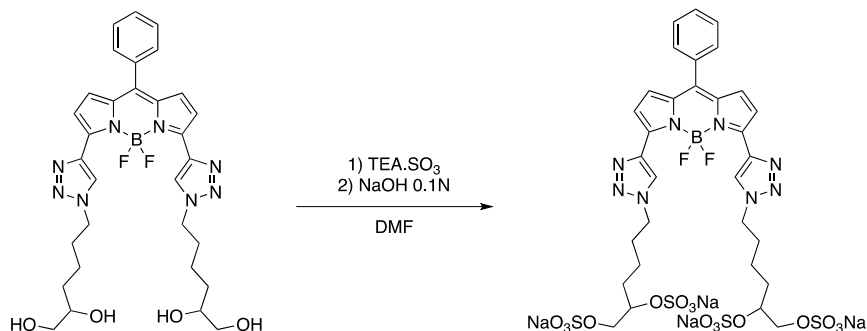

**5** (50.3 mg, 79.3  $\mu$ mol, 1.0 eq) was dissolved in anhydrous DMF (5 mL) under argon atmosphere. TEA.SO<sub>3</sub> (215 mg, 15 eq) was then poured to the solution and stirred at room temperature overnight.

The mixture was then cooled down to 0°C in an ice bath, diluted with 100 mL pure water and treated by a slow addition of NaOH 0.1 N (23.8 mL, 30 eq). The resulting mixture was then concentrated to dryness under vacuum. 100 mL of pure water was added to dissolve the solid and the solution was concentrated again. This operation was repeated at least 4 times, until DMF and TEA were fully evaporated.

The dark purple solid was then purified by dialysis to remove salts. The solid was dissolved in a minimal amount of pure water (~ 3 mL) and poured into a dialysis tube Float-A-Lyzer G2 0.1-0.5 kD. Dialysis was performed in a 500 mL pure water stirred in a beaker. The water was changed after 3, 6 and 24 hours. The solution contained into the tube was then collected, evaporated to dryness to get **6** (77 mg, 93%) as a dark solid.

<sup>1</sup>H NMR (400 MHz, D<sub>2</sub>O) :  $\delta$  = 1.32-1.50 (m, 4H), 1.59-1.88 (m, 8H), 4.12 (dd, <sup>2</sup>J = 10.8 Hz, <sup>3</sup>J = 4.0 Hz, 2H), 4.23 (dd, <sup>2</sup>J = 10.8 Hz, <sup>3</sup>J = 4.0 Hz, 2H), 4.38 (t, <sup>3</sup>J = 7.1 Hz, 4H), 4.48-4.58 (m, 2H), 6.53 (d, <sup>3</sup>J = 4.4 Hz, 2H), 6.79 (d, <sup>3</sup>J = 4.4 Hz, 2H), 7.31 (d, <sup>3</sup>J = 7.4 Hz, 2H), 7.60 (t, <sup>3</sup>J = 7.4 Hz, 2H), 7.70 (t, <sup>3</sup>J = 7.4 Hz, 1H), 8.42 (s, 2H). <sup>13</sup>C NMR (100 MHz, D<sub>2</sub>O): 21.4, 29.4, 29.9, 50.3, 68.8, 77.3, 118.8, 125.9 (*J* = 9.5 Hz), 128.5, 130.4, 130.6, 130.9, 133.4, 136.5, 138.6, 143.8, 145.7. <sup>19</sup>F NMR (160 MHz, D<sub>2</sub>O):  $\delta$  = -143.3 (m). HR-MS (ESI<sup>-</sup>): [M-Na]<sup>-</sup> calcd. for C<sub>31</sub>H<sub>33</sub>BF<sub>2</sub>N<sub>8</sub>Na<sub>3</sub>O<sub>16</sub>S<sub>4</sub> : 1019.0657; found : 1019.0675. MP (Kofler): >250°C. Not determined. IR (cm<sup>-1</sup>): 3444 (b), 2943 (w), 1580 (m), 1549 (m), 1217 (m).

## References

- (1) J. Waser, B. Gaspar, H. Nambu and E. M. Carreira, *J. Am. Chem. Soc.*, 2006, **128**, 11693–11712.
- (2) L. F. Tietze, G. Ketschau and K. Heitmann, *Synthesis*, 1996, 851–857.
- (3) J. Sinha, R. Sahoo and A. Kumar, *Macromolecules*, 2009, **42**, 2015–2022.
- (4) J. M. Lobez and T. M. Swager, *Angew. Chem. Int. Ed.*, 2010, **49**, 95–98.
- (5) C. Shao, X. Wang, J. Xu, J. Zhao, Q. Zhang and Y. Hu, *J. Org. Chem.*, 2010, **75**, 7002–7005.
- (6) B. R. Groves, S. M. Crawford, T. Lundrigan, C. F. Matta, S. Sowlati-Hashjin and A. Thompson, *Chem. Commun.*, 2013, **49**, 816–818.
- (7) G. A. Molander and R. Figueroa, *Org. Lett.*, 2006, **8**, 75–78.

## Fluorescence measurements

|           | Solvent                         | $\lambda_{\max}$<br>(nm) | $\epsilon$<br>(L.mol <sup>-1</sup> .cm <sup>-1</sup> ) | $\lambda_{\text{em}}$<br>(nm) | $\phi^a$<br>(%) | $\tau^b$<br>(ns) | $k_R^c$<br>(10 <sup>6</sup> s <sup>-1</sup> ) | $k_{NR}^c$<br>(10 <sup>6</sup> s <sup>-1</sup> ) |
|-----------|---------------------------------|--------------------------|--------------------------------------------------------|-------------------------------|-----------------|------------------|-----------------------------------------------|--------------------------------------------------|
| <b>4a</b> | CH <sub>2</sub> Cl <sub>2</sub> | 583                      | 67000                                                  | 598                           | >0.95           | 6.9              | 138                                           | 7.2                                              |
| <b>4b</b> | CH <sub>2</sub> Cl <sub>2</sub> | 583                      | 83900                                                  | 596                           | >0.95           | 6.5              | 146                                           | 7.7                                              |
| <b>5</b>  | MeOH                            | 575                      | 72700                                                  | 590                           | 0.86            | 6.8              | 126                                           | 20.6                                             |
| <b>6</b>  | MeOH                            | 576                      | 64000                                                  | 595                           | 0.93            | 7.8              | 119                                           | 8.9                                              |
| <b>6</b>  | H <sub>2</sub> O                | 569                      | 61000                                                  | 590                           | 0.81            | 6.9              | 117                                           | 27.5                                             |

[a] Standard used for quantum yield measurements: cresyl violet ( $\phi = 0.55$  in MeOH). [b] NanoLED excitation at 490 nm. [c] with  $k_R = \phi/\tau$  and  $k_{NR} = (1-\phi)/\tau$ .

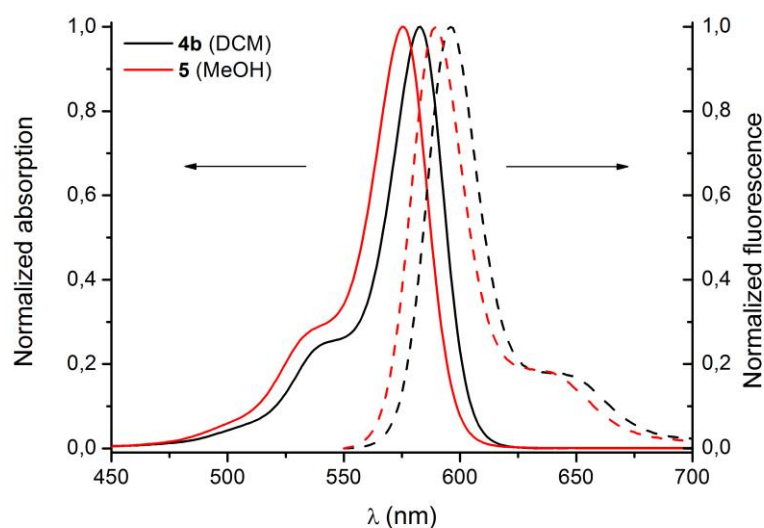

Fig 1: Normalized absorption (plain line) and normalized emission (dotted line) spectra for BODIPYs **4b** and **5**.

## X-ray data

Crystal data of **4a** was collected at room temperature using a Gemini Oxford Diffractometer (MoK $\alpha$  radiation,  $\lambda = 0.71069 \text{ \AA}$ ) equipped with a CCD camera and by using the related software.<sup>8</sup> An absorption correction (analytical) has been applied to all the data sets.<sup>9</sup> The structure was solved by direct methods using the SIR97 program<sup>10</sup> combined with Fourier Difference and the refined against F using the CRYSTALS program.<sup>11</sup> All atomic displacements for non-hydrogen atoms were refined using an anisotropic model. Hydrogen atoms have been placed by Fourier Difference account the hybridization of the supporting atoms and for the possible presence of hydrogen bonds in the case of donor atoms. Hydrogen atoms have been finally refined using a riding mode.

CCDC 1405386 reference contains the supplementary crystallographic data for **4a**. These data can be obtained free of charge from The Cambridge Crystallographic Data Centre via [www.ccdc.cam.ac.uk/data\\_request/cif](http://www.ccdc.cam.ac.uk/data_request/cif)

In table S11 is summarized the data collection parameters and refinement results for **4a**. Indications on B-F $\cdots$ H hydrogen bonds are located in Table S12.

**Table S11.** Single-crystal X-ray diffraction: data collection parameters and refinement results for **4a**.

| <b>4a</b>                                                                |                                                                                                       |
|--------------------------------------------------------------------------|-------------------------------------------------------------------------------------------------------|
| Empirical formula                                                        | C <sub>31</sub> H <sub>37</sub> B <sub>1</sub> F <sub>2</sub> N <sub>8</sub>                          |
| Molecular weight (g.mol <sup>-1</sup> )                                  | 570.5                                                                                                 |
| Crystal system                                                           | monoclinic                                                                                            |
| Space group                                                              | P2 <sub>1</sub> /c                                                                                    |
| Unit-cell parameters                                                     | a = 11.183(1) Å<br>b = 9.737(1) Å<br>c = 27.817(4) Å<br>β = 94.45(1)°<br>V = 3019.5(6) Å <sup>3</sup> |
| Crystal shape                                                            | plate                                                                                                 |
| Crystal color                                                            | red                                                                                                   |
| Crystal size (mm <sup>3</sup> )                                          | 0.099 × 0.279 × 0.331                                                                                 |
| Z                                                                        | 4                                                                                                     |
| T (K)                                                                    | 293                                                                                                   |
| Density                                                                  | 1.255                                                                                                 |
| μ (mm <sup>-1</sup> )                                                    | 0.086                                                                                                 |
| No. ind. reflections                                                     | 7122                                                                                                  |
| R <sub>int</sub>                                                         | 0.087                                                                                                 |
| R(F)                                                                     | 0.0782                                                                                                |
| R <sub>w</sub> (F)                                                       | 0.0839                                                                                                |
| S                                                                        | 1.08                                                                                                  |
| Δρ <sub>min</sub> / Δρ <sub>max</sub> (e <sup>-</sup> .Å <sup>-3</sup> ) | -0.40 / +0.63                                                                                         |
| No. reflections used                                                     | 2901                                                                                                  |
| No. refined parameters                                                   | 379                                                                                                   |
| Absorption correction                                                    | analytical                                                                                            |

**Table S12.** B-F<sup>⋯</sup>H hydrogen bonds information for **4a**.

| <b>B-F bond lengths (Å)</b> | <b>F<sup>⋯</sup>H distances (Å)</b> |
|-----------------------------|-------------------------------------|
| 1.40(1)                     | 2.287(2)                            |
| 1.387(9)                    | 2.571(3)                            |

- (8) CrysAlisPro, version 1.171.34.40 (rel. 27-08-2010, CrysAlis171.NET), Oxford Diffraction Ltd.
- (9) O. D. L. CrysAlisPro, version 1.171.34.40 (rel. 27-08-2010, CrysAlis1 171.NET), (compiled Aug. 27, 2010, 11:50:40). Analytical numeric absorption correction using a multifaceted crystal model based on expressions derived by: R. C. Clark, J. S. Reid, *Acta Crystallogr., Sect. A* 1995, 51, 887-897.
- (10) G. Cascarano, A. Altomare, C. Giacovazzo, A. Guagliardi, A. G. G. Moliterni, D. Siliqi, M. C. Burla, G. Polidori, M. Camalli, *Acta Crystallogr., Sect. A* 1996, A52.
- (11) D. J. Watkin, C. K. Prout, J. R. Carruthers, P. W. Betteridge, *Chemical Crystallography Laboratory, Oxford*, 1999.

## Cell culture, staining and epifluorescence microscopy observations

24 h prior to observation, actively growing HeLa cells were harvested and seeded in cell culture-treated 96-wells glass bottom plates, at a density of  $1.10^4$  cells per well, in Dulbecco's Modified Eagle Medium (DMEM) supplemented with 10% fetal calf serum,  $50 \text{ U.mL}^{-1}$  penicillin/streptomycin and  $1.25 \text{ }\mu\text{g.mL}^{-1}$  amphotericin B. Cells were then grown at  $37^\circ\text{C}$  in humidified atmosphere containing 5 %  $\text{CO}_2$  in order to allow cellular adhesion and proliferation. After 24 h of culture, cells were stained with various concentrations (typically ranging from 5 nM to 500  $\mu\text{M}$ ) of **4a** or **6** in DMEM + 1% DMSO or DMEM, respectively, and then incubated for 15 min in the conditions described above. After staining, the cells were washed twice with DMEM and observed using an Olympus IX51 epifluorescence microscope. Red reflected fluorescence (Q565LP TRITC filter) and transmitted light images were obtained using an Olympus DP21 digital camera.

### Cellular viability tests

24 h prior to experiment, actively growing HeLa cells were harvested and seeded in cell culture-treated 96-wells glass bottom plates, at a density of  $1.10^4$  cells per well, in Dulbecco's Modified Eagle Medium (DMEM) supplemented with 10% fetal calf serum,  $50 \text{ U.mL}^{-1}$  penicillin/streptomycin and  $1.25 \text{ }\mu\text{g.mL}^{-1}$  amphotericin B. Cells were then grown at  $37^\circ\text{C}$  in humidified atmosphere containing 5 %  $\text{CO}_2$  in order to allow cellular adhesion and proliferation. After 24 h of culture, cells were treated with various concentrations of **4a** or **6** ranging from 100 nM to 100  $\mu\text{M}$  in the presence of 1% DMSO, and then incubated for 1 h in the conditions described above. For viability measurements, a LIVE/DEAD® Cell Imaging Kit (488/570) (Life Technologies) was used to stain the viable cells: briefly, the cells were washed three times with DPBS (Dulbecco's Phosphate Buffered Saline : 2.7 mM KCl, 1.5 mM  $\text{KH}_2\text{PO}_4$ , 138 nM NaCl, 8 mM  $\text{Na}_2\text{HPO}_4 \cdot 7\text{H}_2\text{O}$ ) buffer and then treated with an appropriate concentration (as indicated by the manufacturer) of calcein AM. Live cells are distinguished by the presence of ubiquitous intracellular esterase activity as determined by the enzymatic conversion of the



virtually non-fluorescent cell-permeant calcein AM to the intensely fluorescent calcein, which is well-retained within live cells. The cells were then incubated for 10 min in the conditions described above, and the global fluorescence of each well was measured with an Infinite 200 PRO microplate reader (Tecan group Ltd.) at 488 nm excitation and 515 nm emission. The fluorescence of wells containing untreated cells was measured as positive control and for normalization (100% viability), and wells containing cells treated by 45% ethanol for 30 min were used as negative controls and for background fluorescence measurement. Each measurement was realized in triplicate.

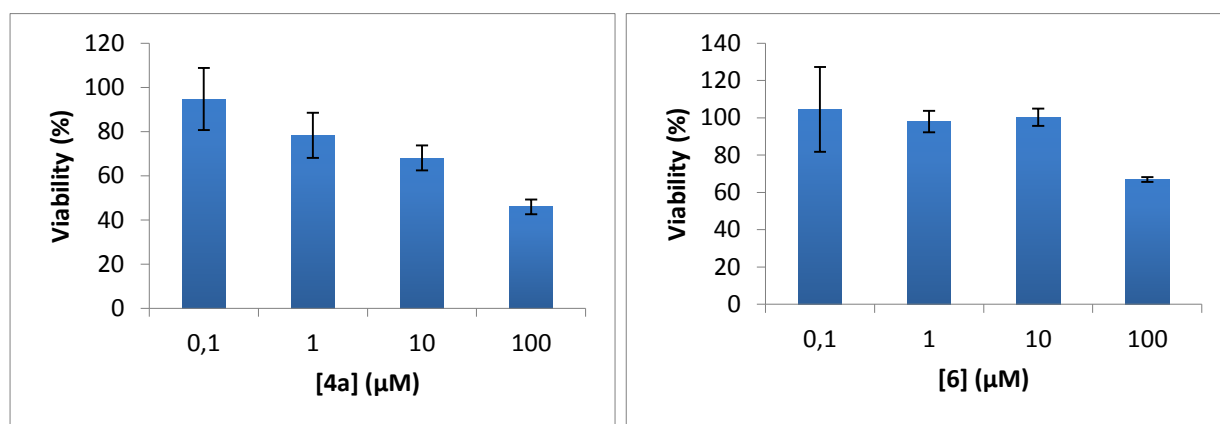

**Fig. S1** Viability analysis of HeLa cells treated with **4a** and **6**. Cells were treated for 1 h with both compounds and then stained using calcein AM viability dye. The global fluorescence of wells containing untreated cells was set to 100%.

# NMR Spectra

<sup>1</sup>H NMR spectrum (300 MHz) of 1-tosyl-1H-pyrrole-2-carbaldehyde in CDCl<sub>3</sub>

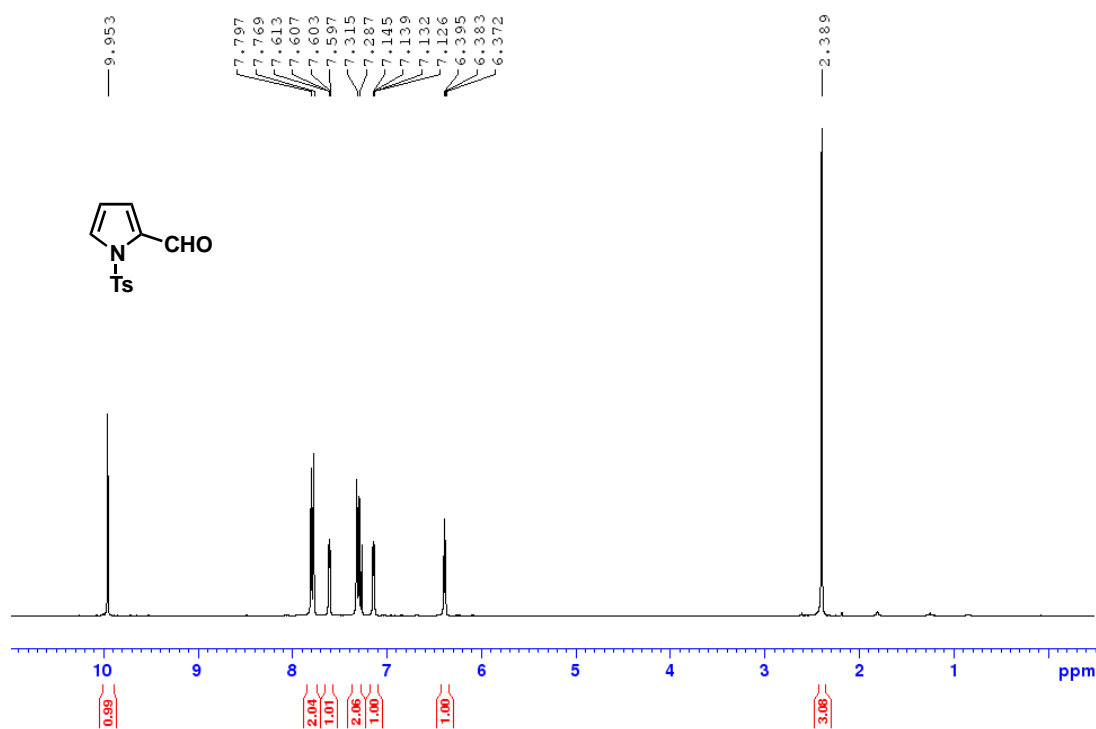

<sup>13</sup>C NMR spectrum (75 MHz) of 1-tosyl-1H-pyrrole-2-carbaldehyde in CDCl<sub>3</sub>

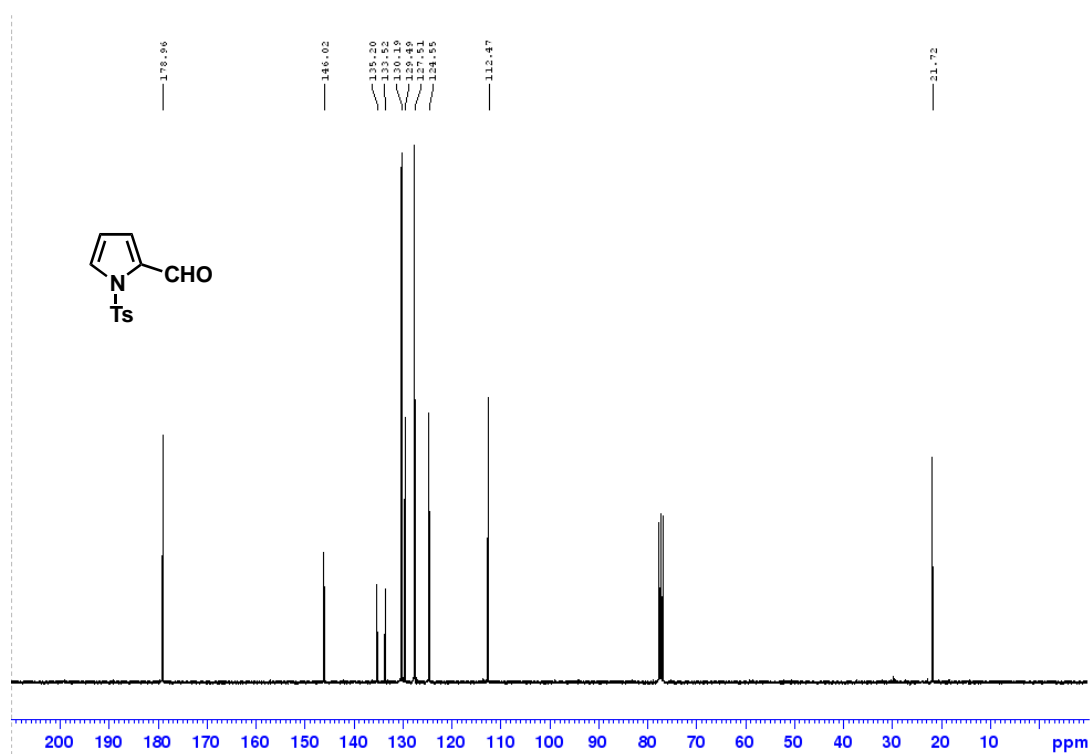

**<sup>1</sup>H NMR spectrum (300 MHz) of 2-(2,2-dibromovinyl)-1-tosyl-1H-pyrrole in CDCl<sub>3</sub>**

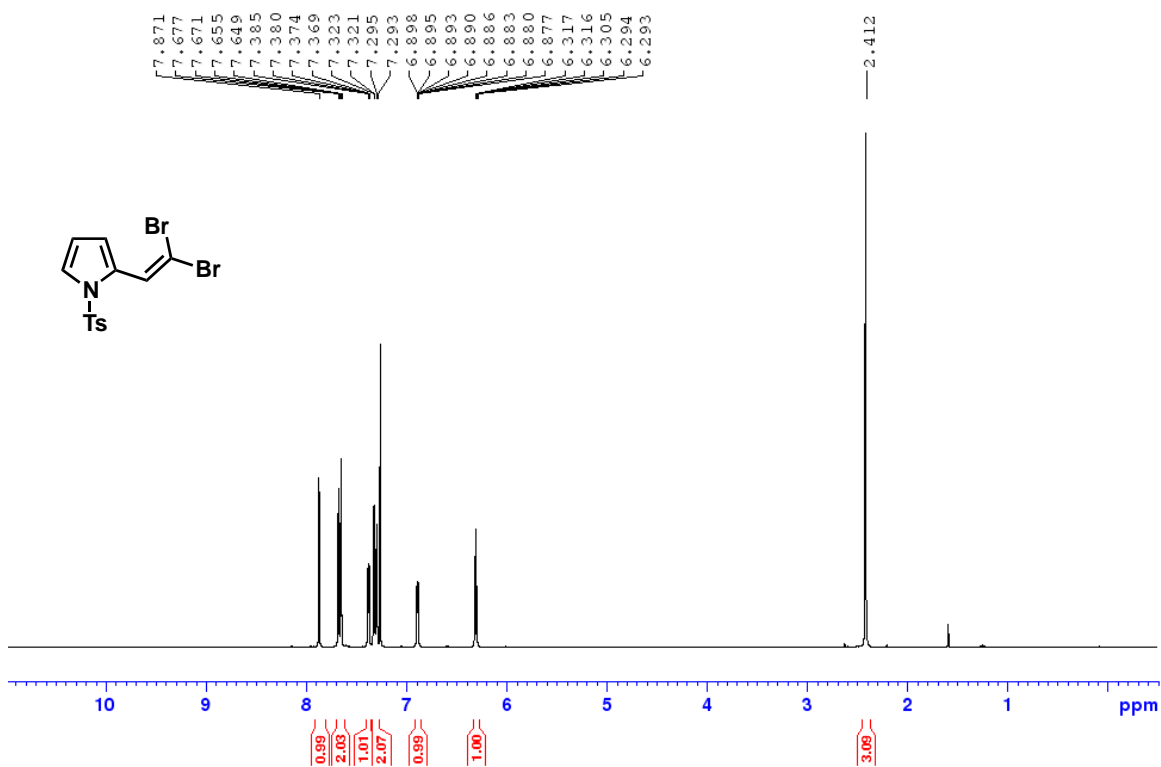

**<sup>13</sup>C NMR spectrum (75 MHz) of 2-(2,2-dibromovinyl)-1-tosyl-1H-pyrrole in CDCl<sub>3</sub>**

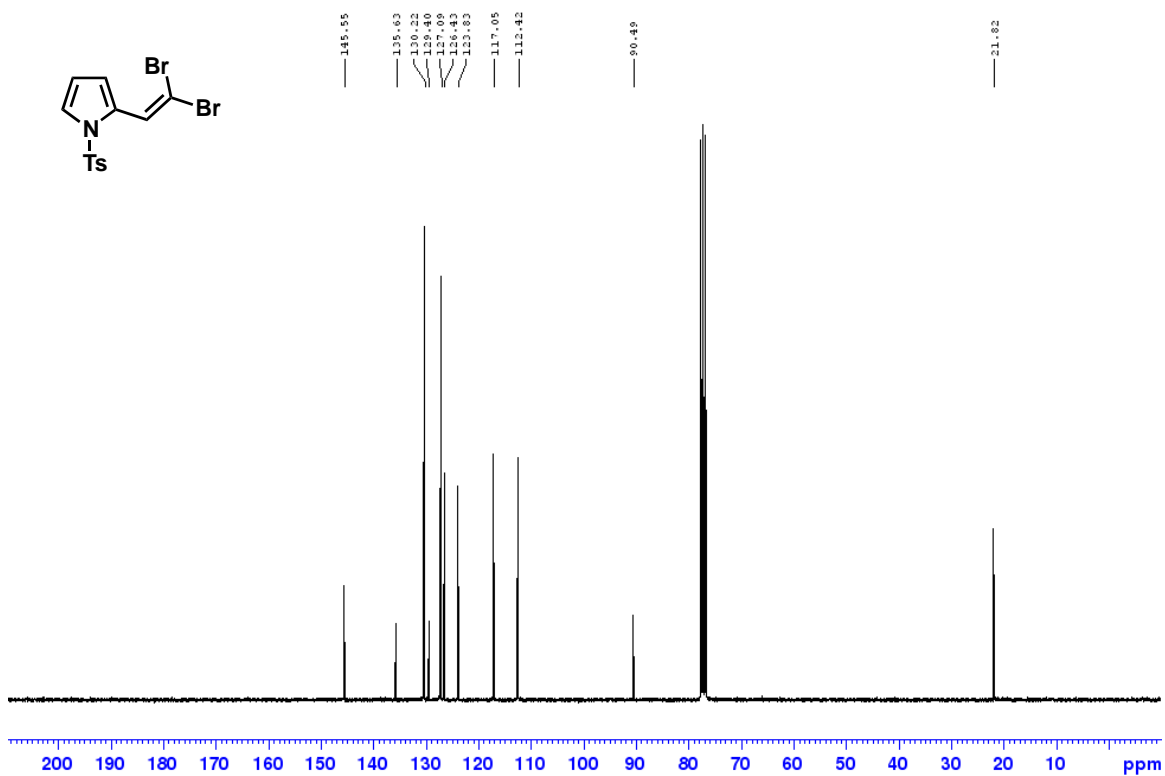

**<sup>1</sup>H NMR spectrum (300 MHz) of 1 in CDCl<sub>3</sub>**

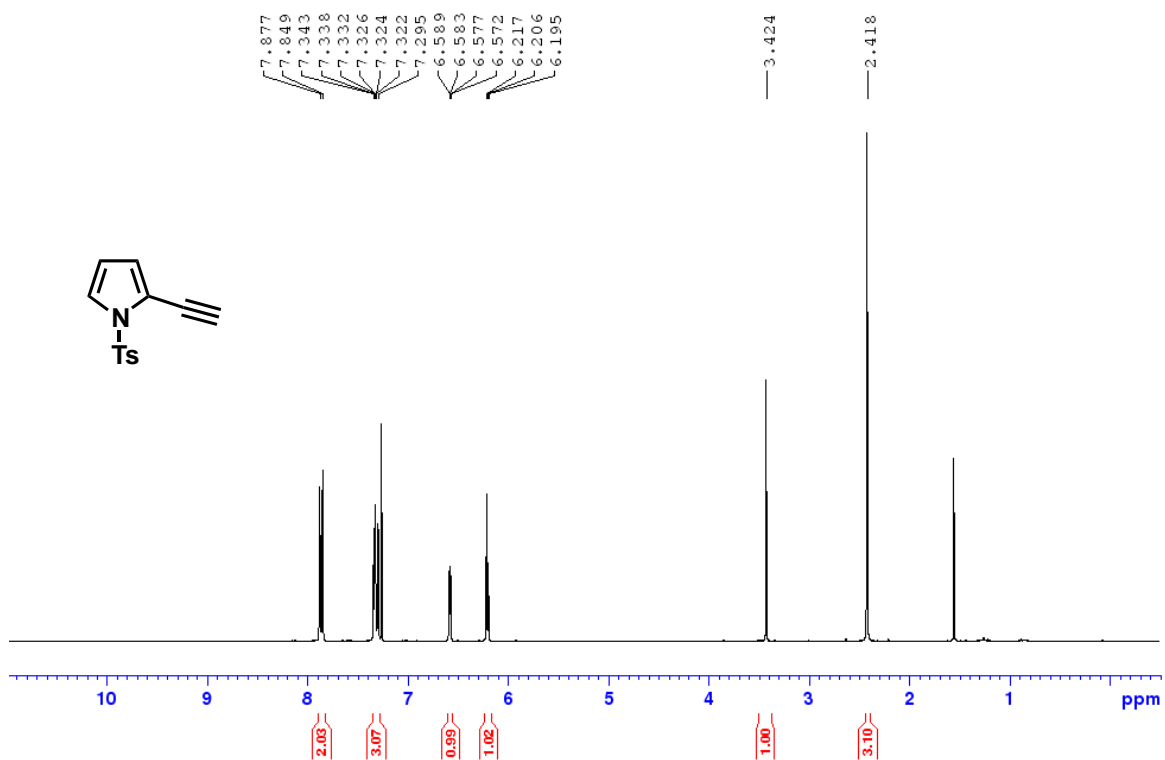

**<sup>13</sup>C NMR spectrum (75 MHz) of 1 in CDCl<sub>3</sub>**

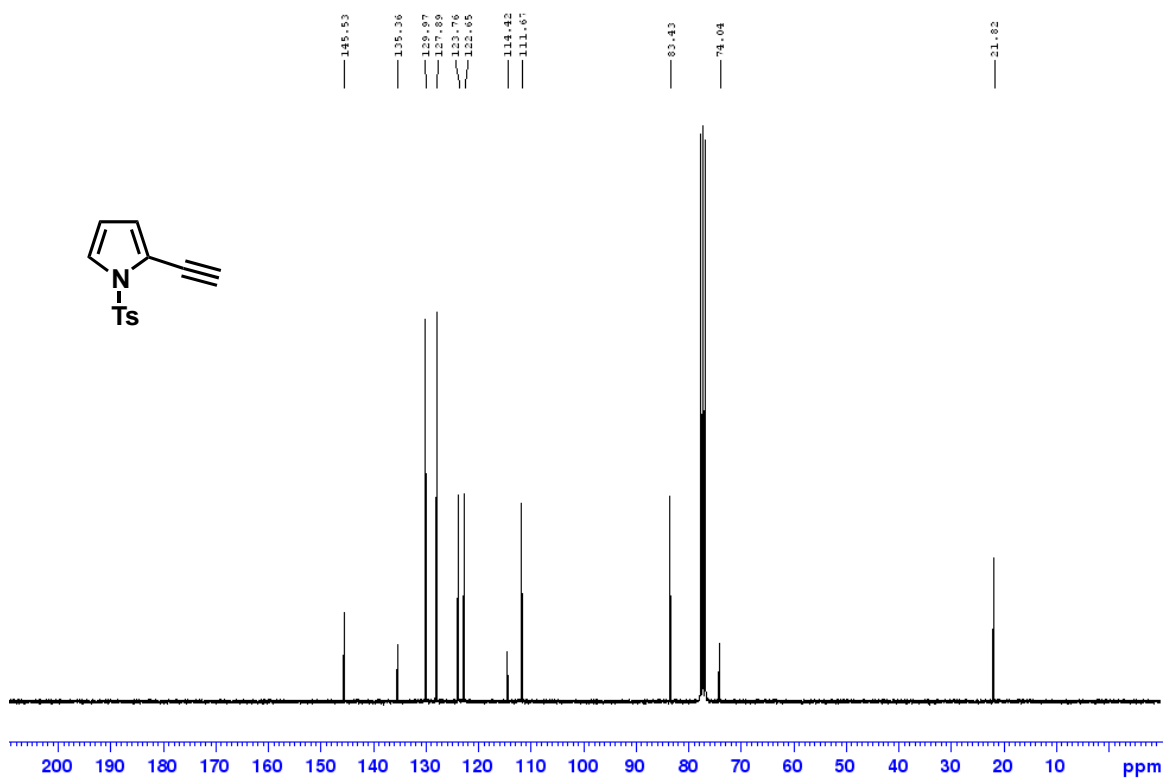

**<sup>1</sup>H NMR spectrum (400 MHz) of 2a in CDCl<sub>3</sub>**

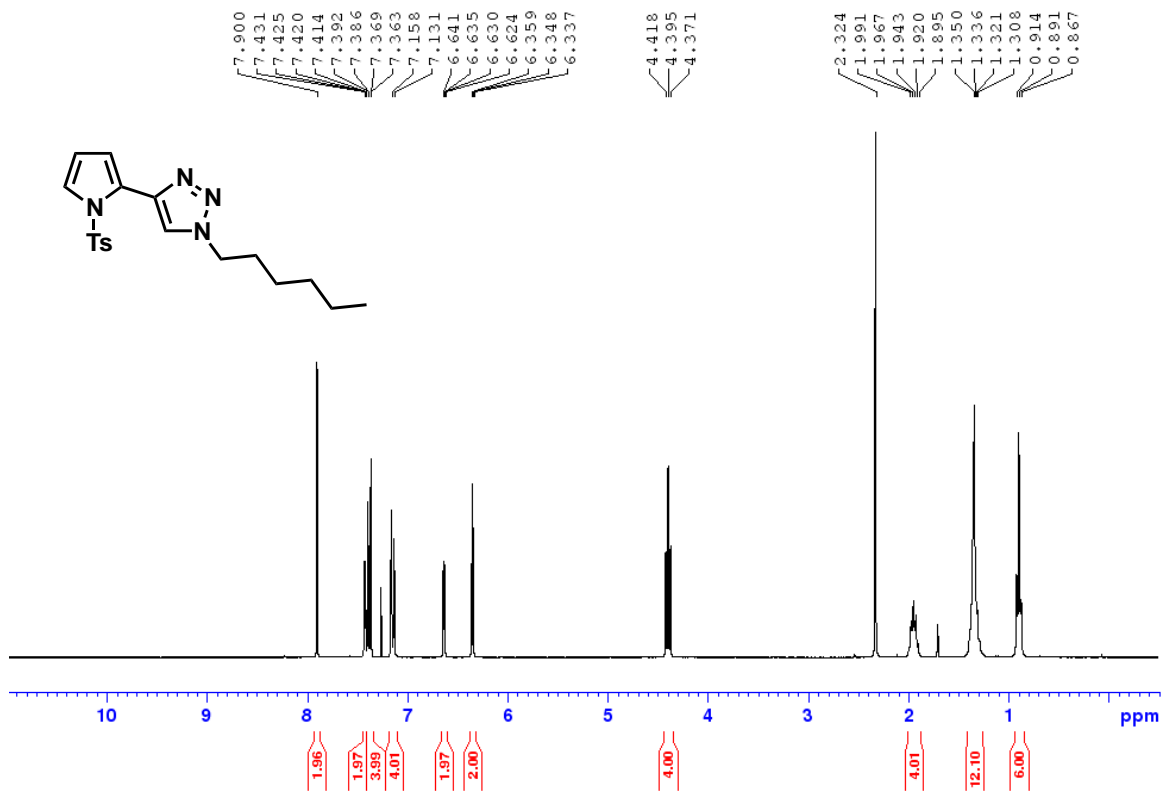

**<sup>13</sup>C NMR spectrum (100 MHz) of 2a in CDCl<sub>3</sub>**

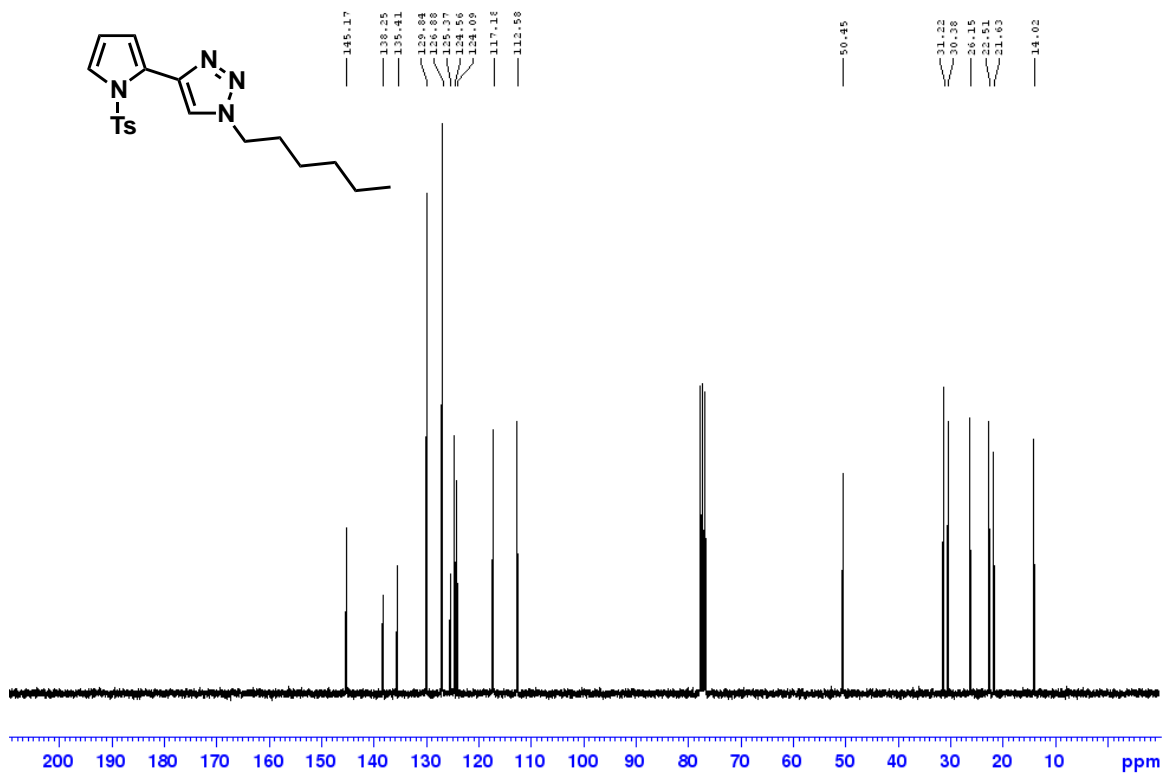

**<sup>1</sup>H NMR spectrum (400 MHz) of 2b in CDCl<sub>3</sub>**

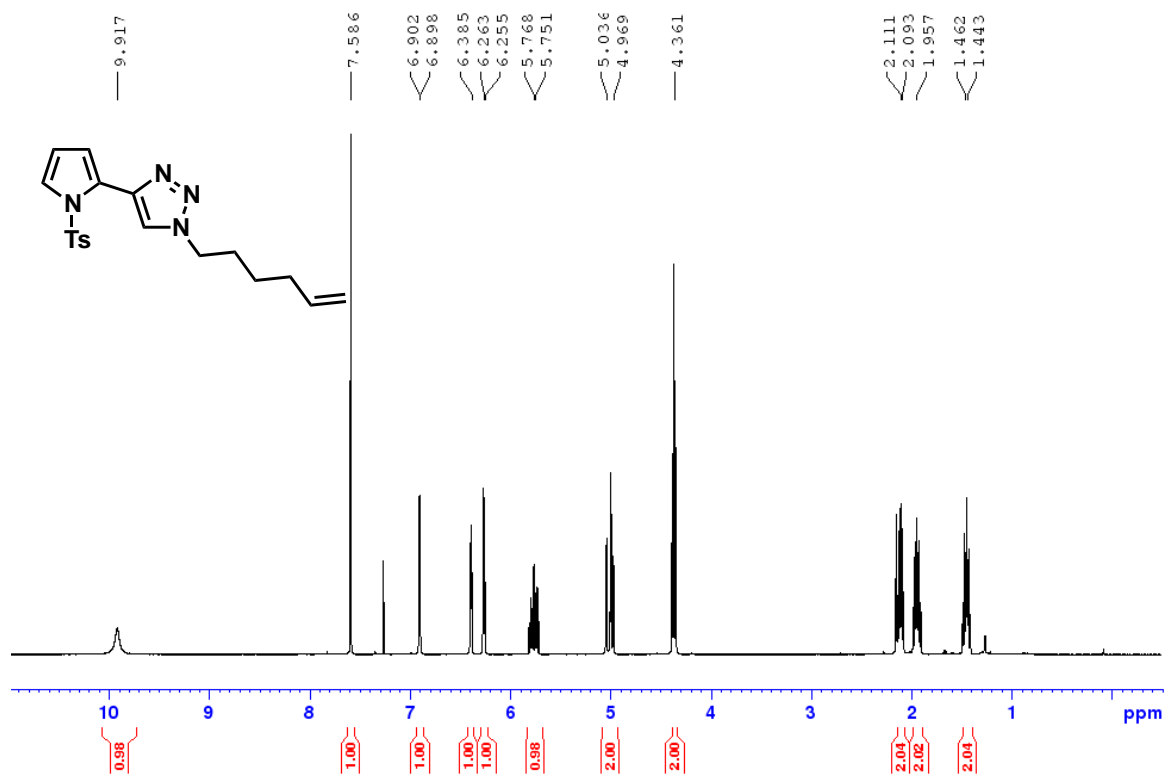

**<sup>13</sup>C NMR spectrum (100 MHz) of 2b in CDCl<sub>3</sub>**

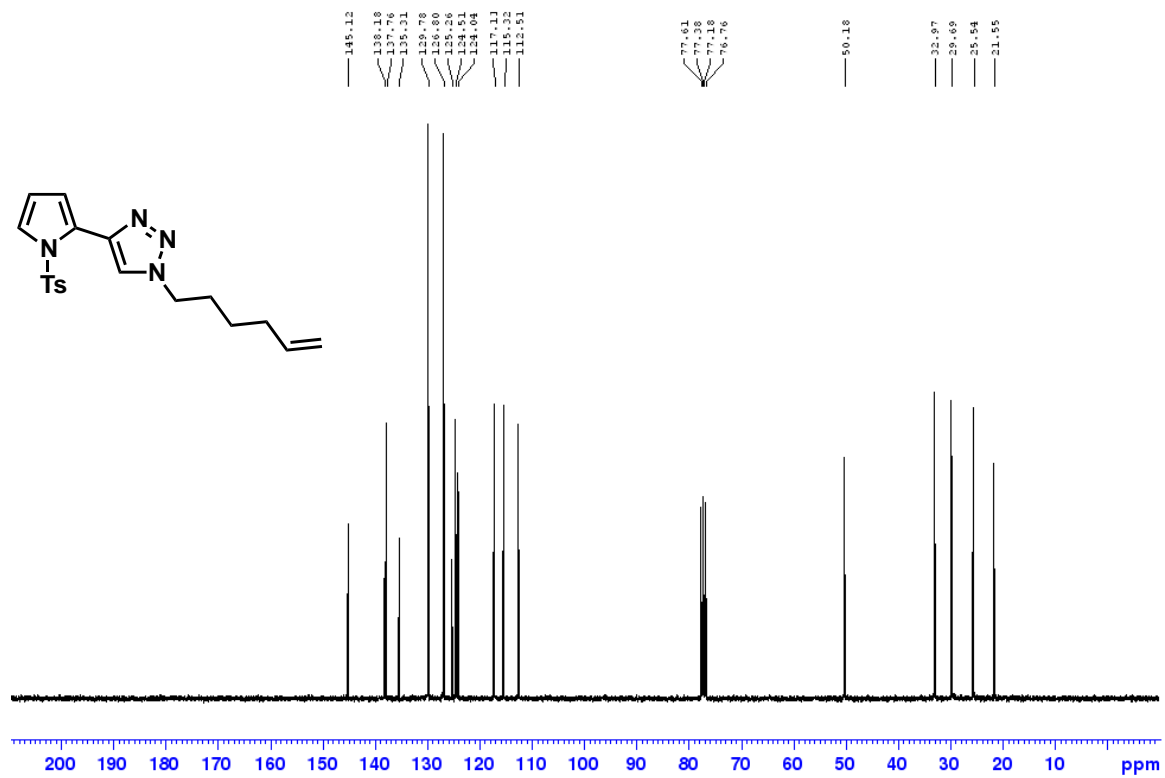

**<sup>1</sup>H NMR spectrum (300 MHz) of 3a in CDCl<sub>3</sub>**

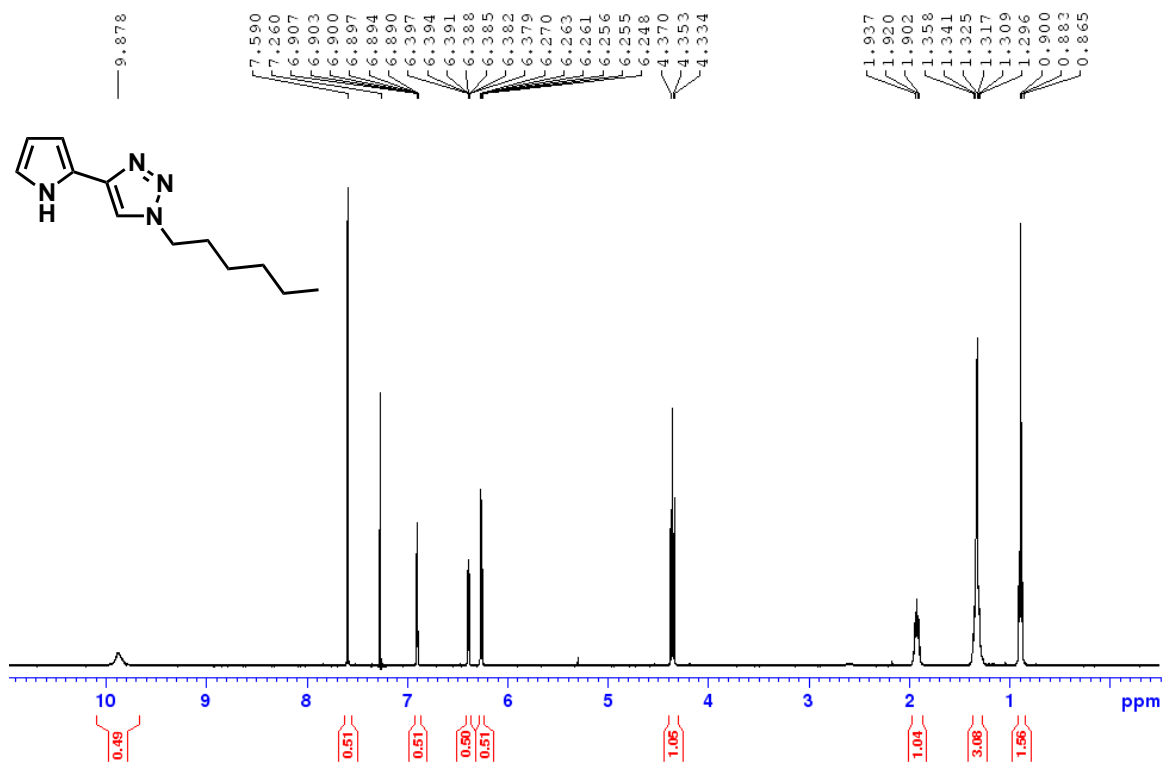

**<sup>13</sup>C NMR spectrum (100 MHz) of 3a in CDCl<sub>3</sub>**

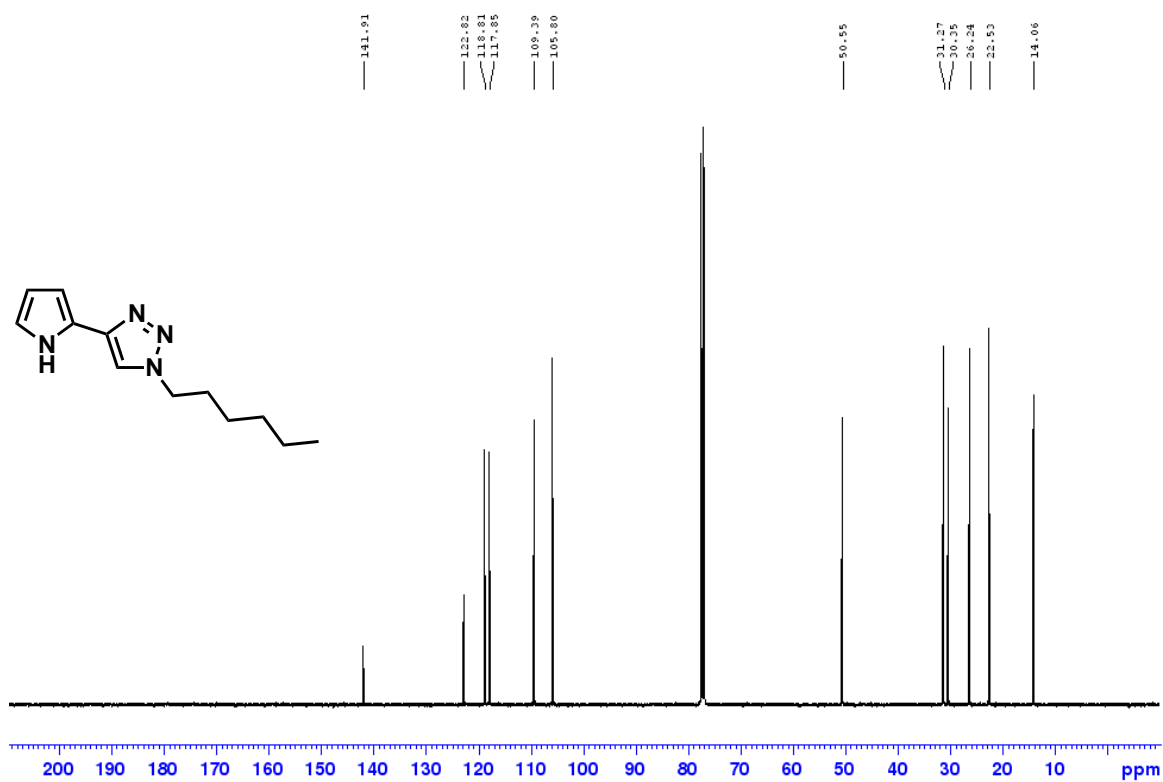

<sup>1</sup>H NMR spectrum (400 MHz) of 3b in CDCl<sub>3</sub>

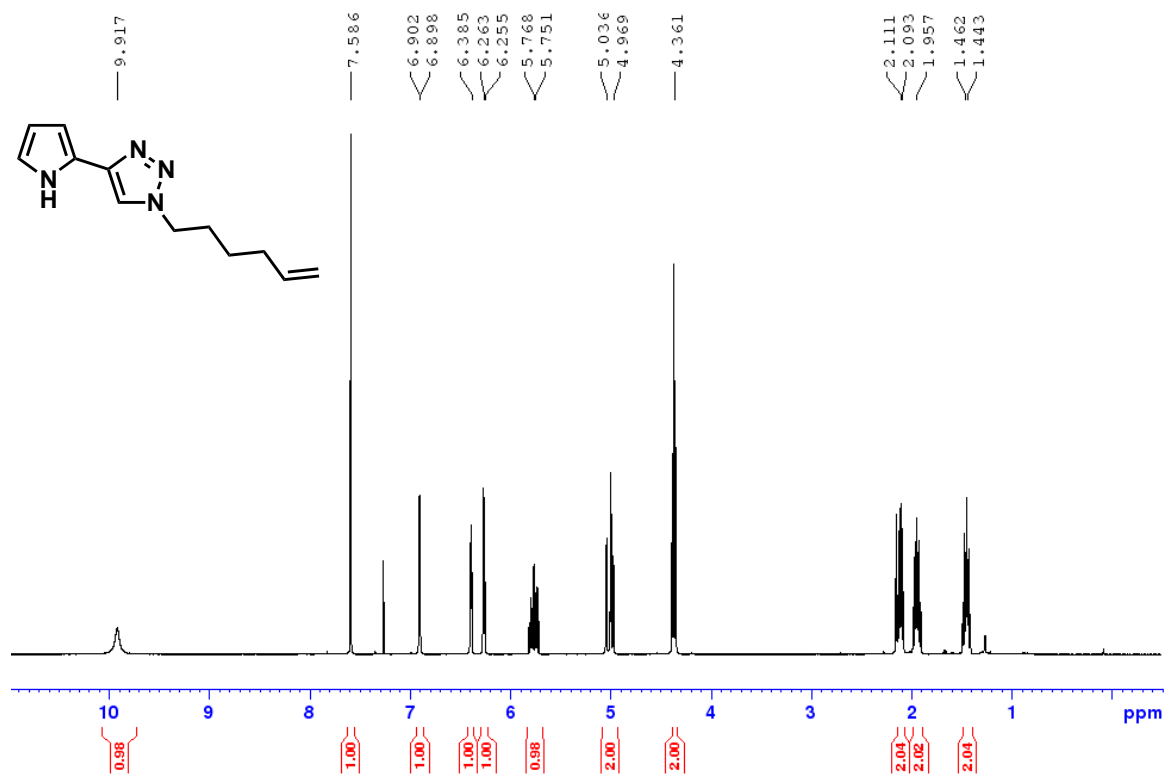

<sup>13</sup>C NMR spectrum (100 MHz) of 3b in CDCl<sub>3</sub>

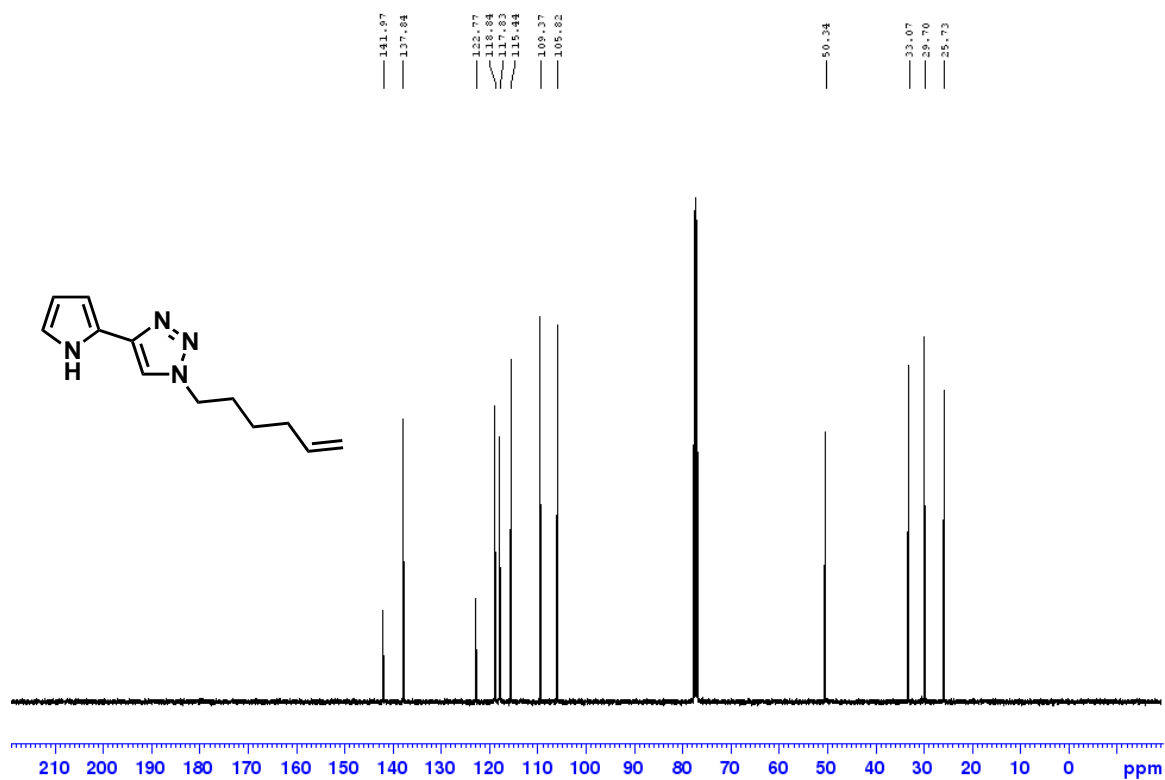



**<sup>1</sup>H NMR spectrum (400 MHz) of dipyrromethene derived from 3a in acetone-d<sub>6</sub>**

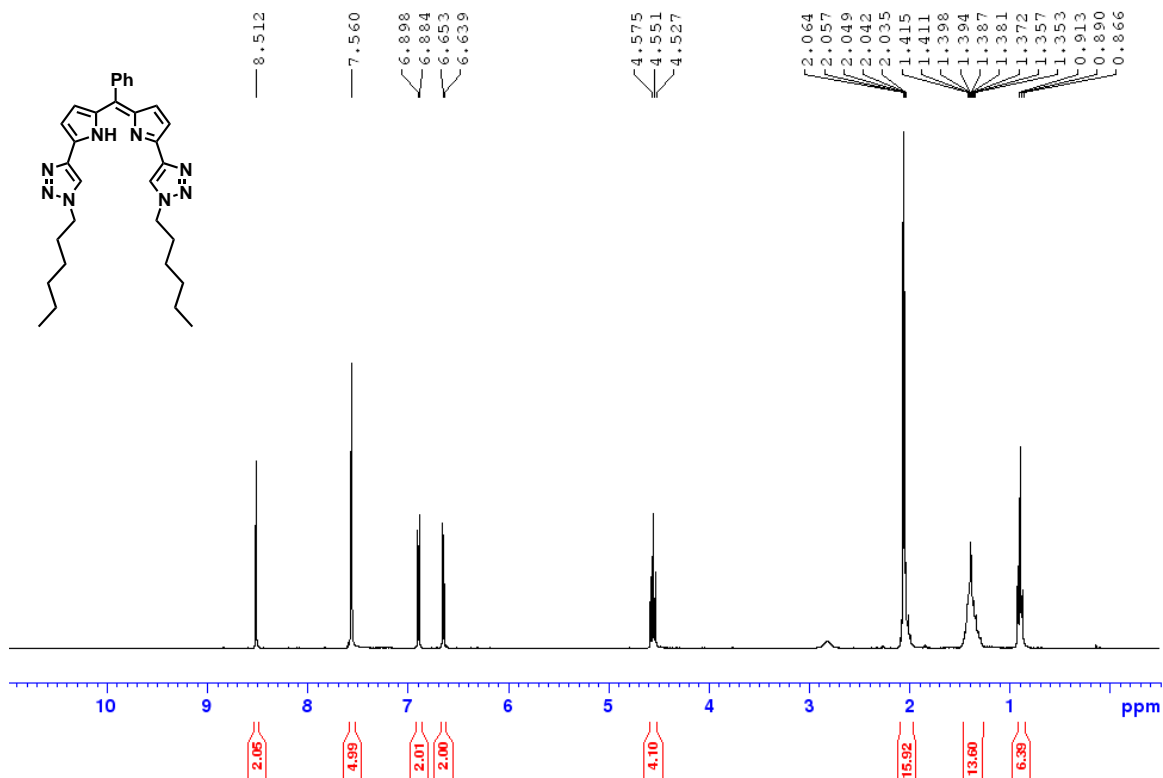

**<sup>13</sup>C NMR spectrum (100 MHz) of dipyrromethene derived from 3a in CDCl<sub>3</sub>**

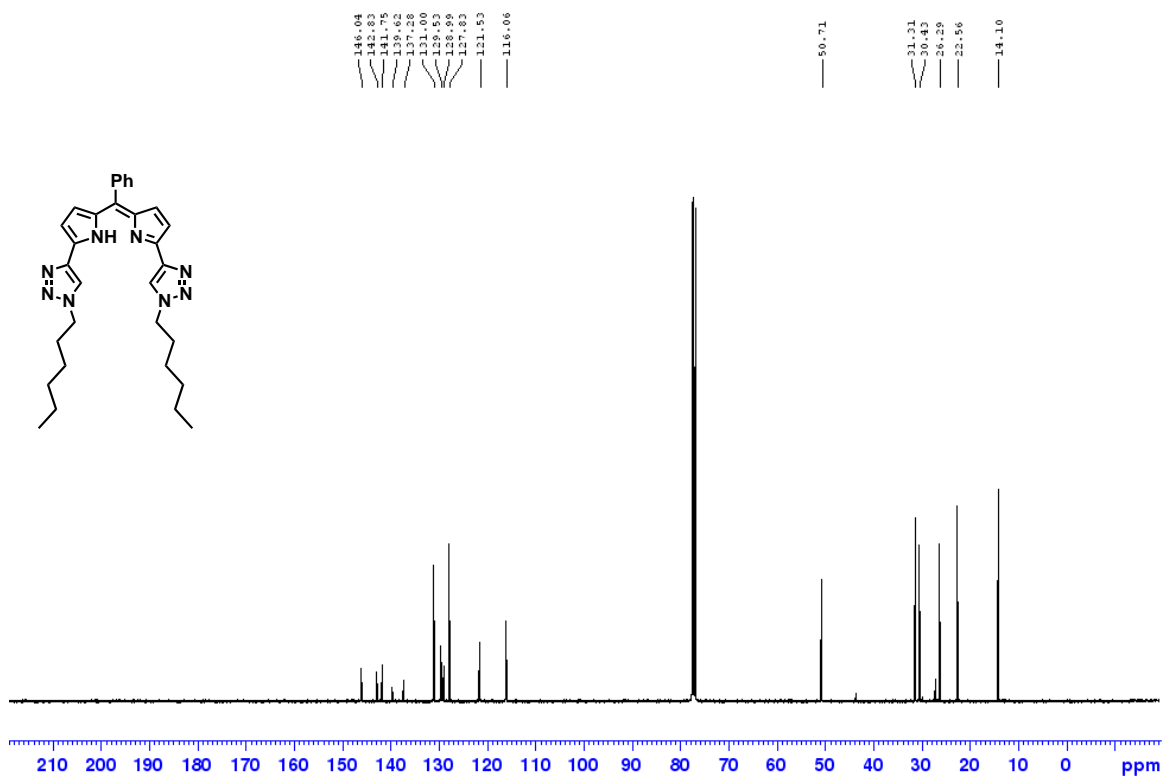

**<sup>1</sup>H NMR spectrum (400 MHz) of dipyrromethene derived from 3b in CDCl<sub>3</sub>**

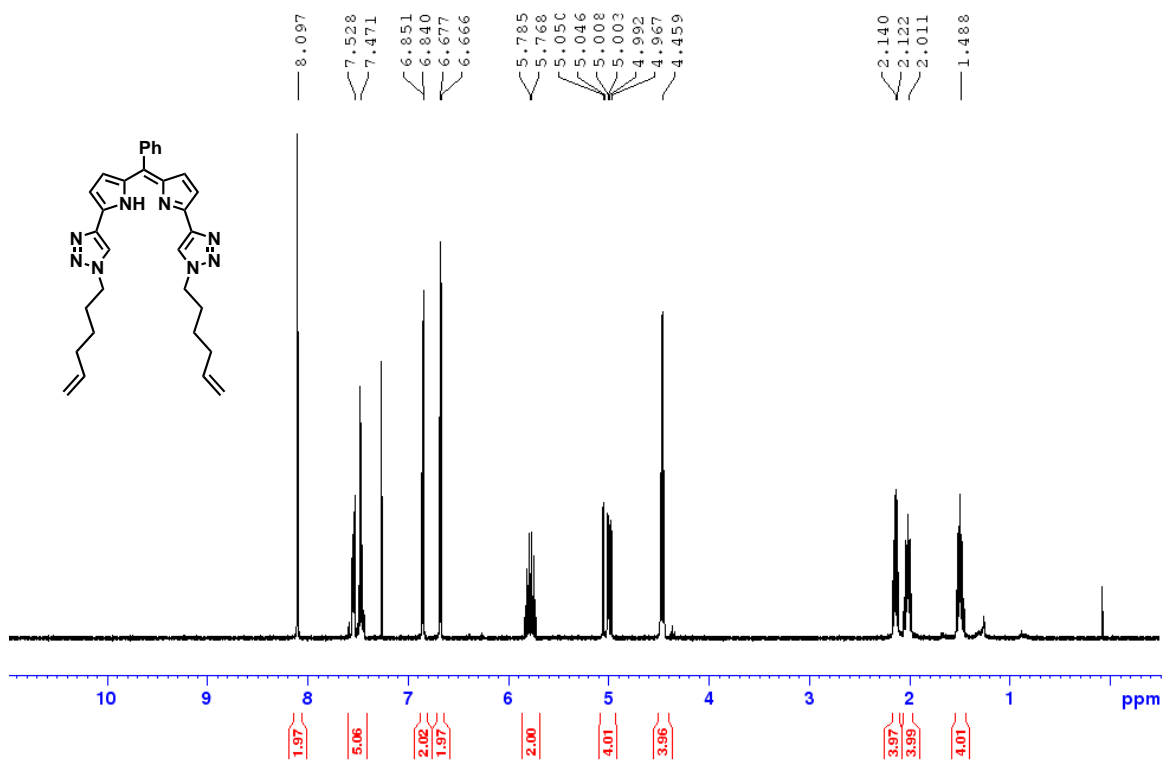

**<sup>13</sup>C NMR spectrum (100 MHz) of dipyrromethene derived from 3b in CDCl<sub>3</sub>**

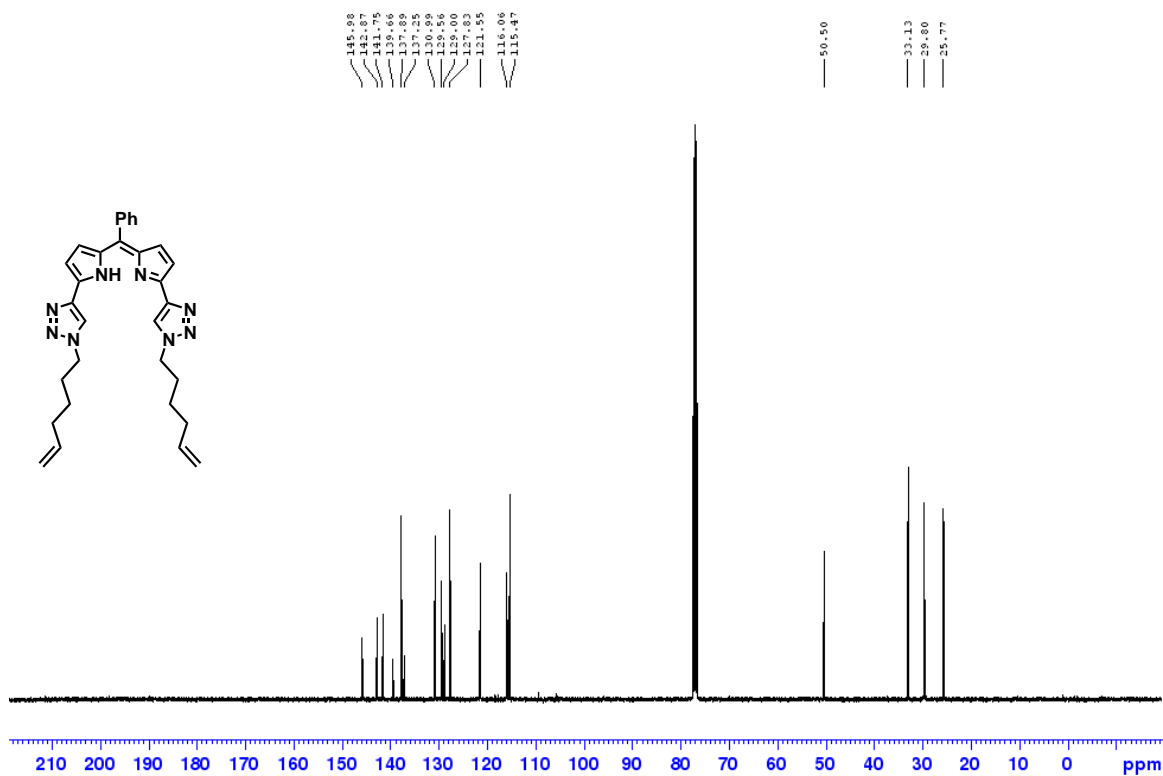

**<sup>1</sup>H NMR spectrum (400 MHz) of 4a in CDCl<sub>3</sub>**

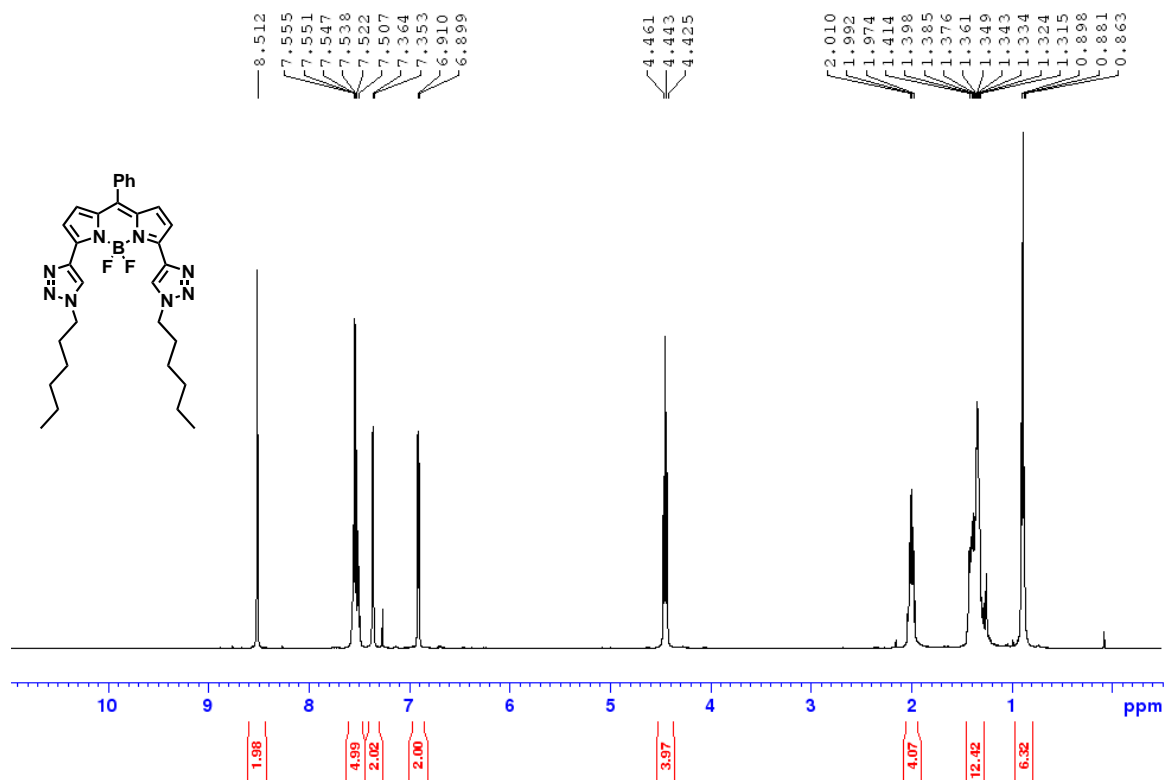

**<sup>13</sup>C NMR spectrum (100 MHz) of 4a in CDCl<sub>3</sub>**

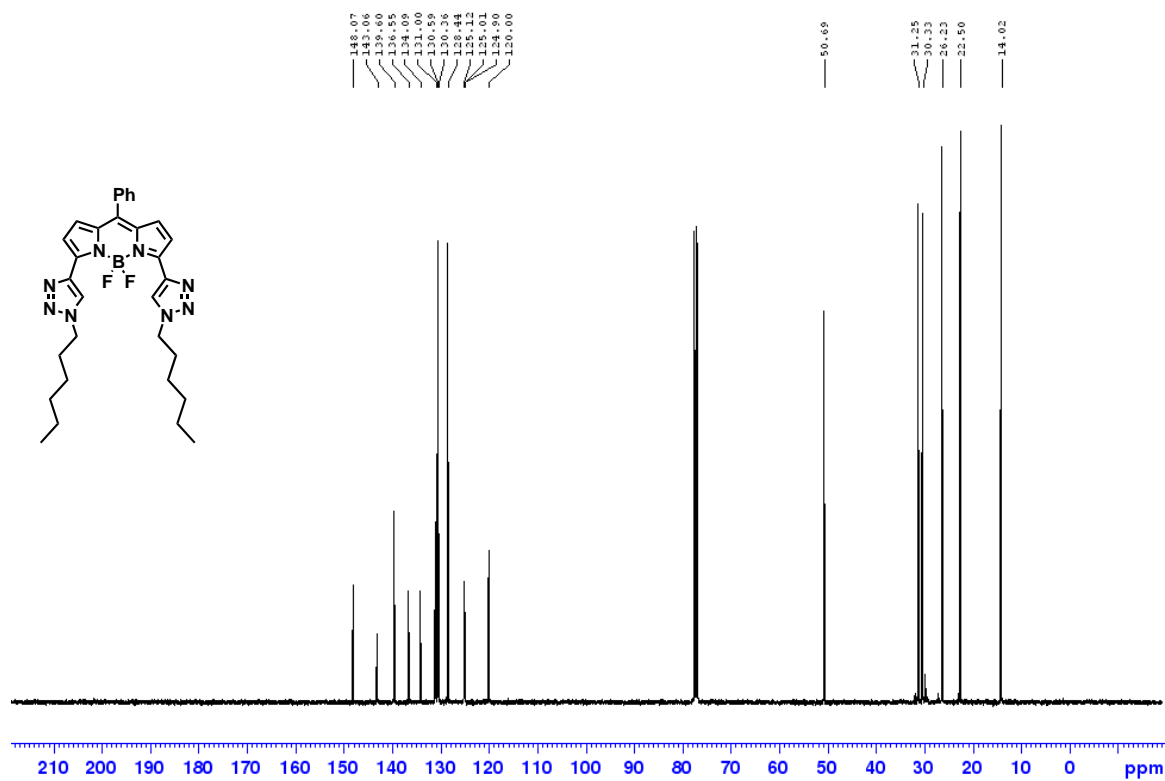

<sup>19</sup>F NMR spectrum (160 MHz) of 4a in CDCl<sub>3</sub>

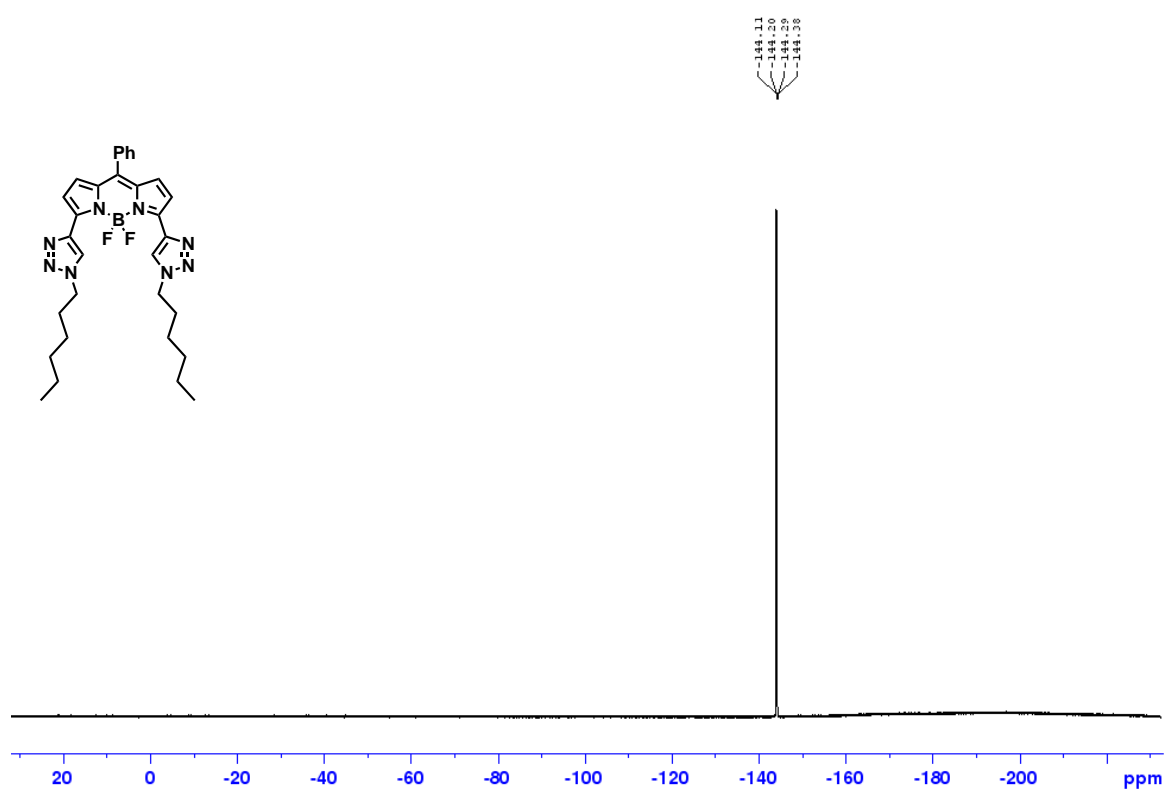

**<sup>1</sup>H NMR spectrum (400 MHz) of 4b in CDCl<sub>3</sub>**

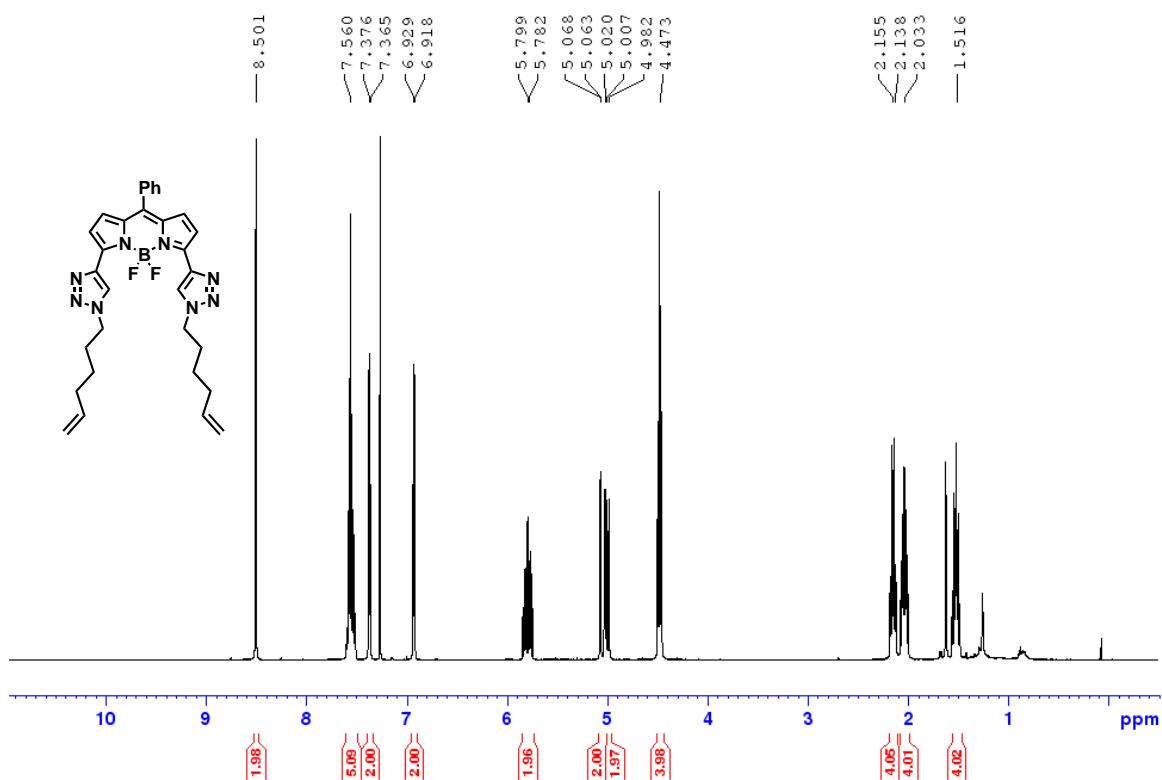

**<sup>13</sup>C NMR spectrum (100 MHz) of 4b in CDCl<sub>3</sub>**

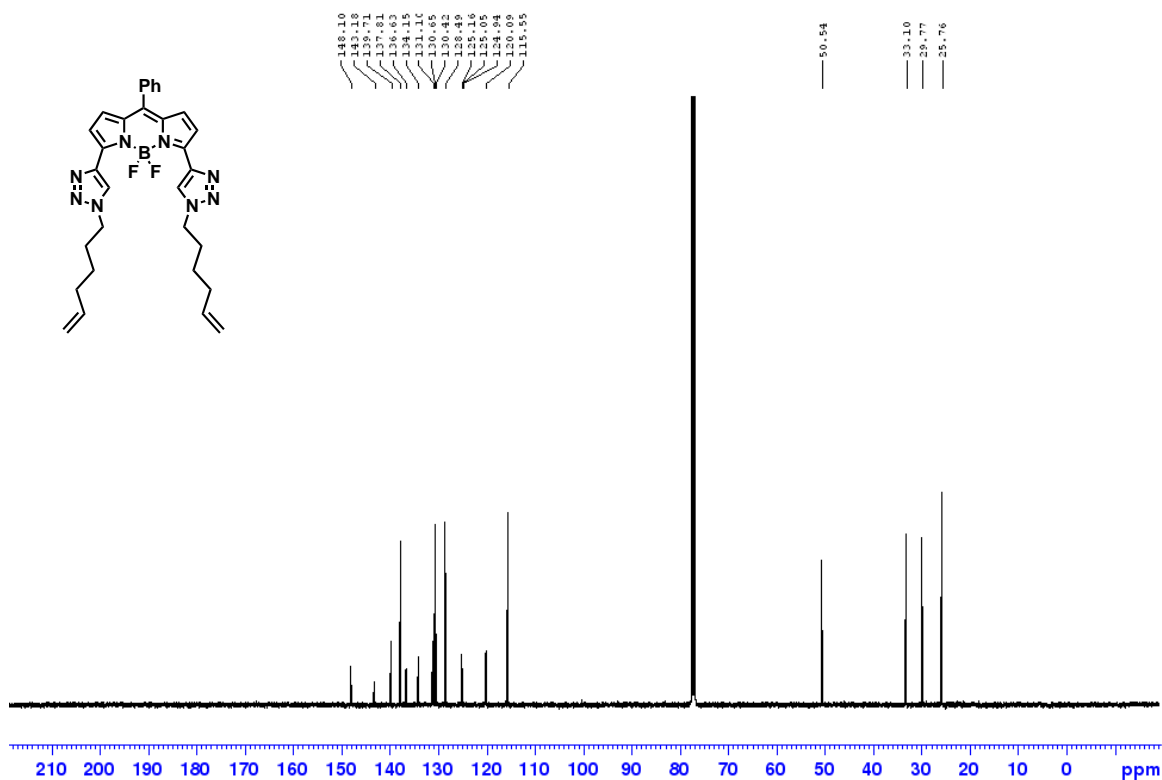

<sup>19</sup>F NMR spectrum (160 MHz) of 4b in CDCl<sub>3</sub>

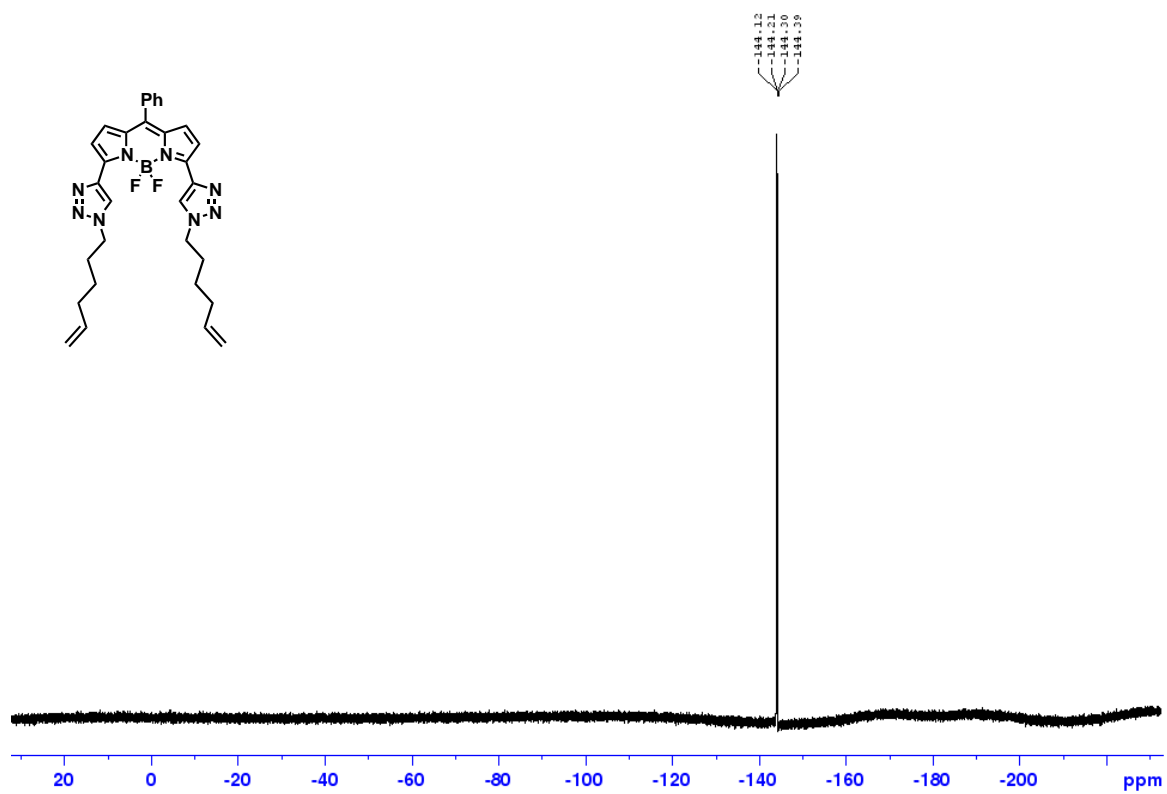

**<sup>1</sup>H NMR spectrum (400 MHz) of 5 in DMSO-d<sub>6</sub>**

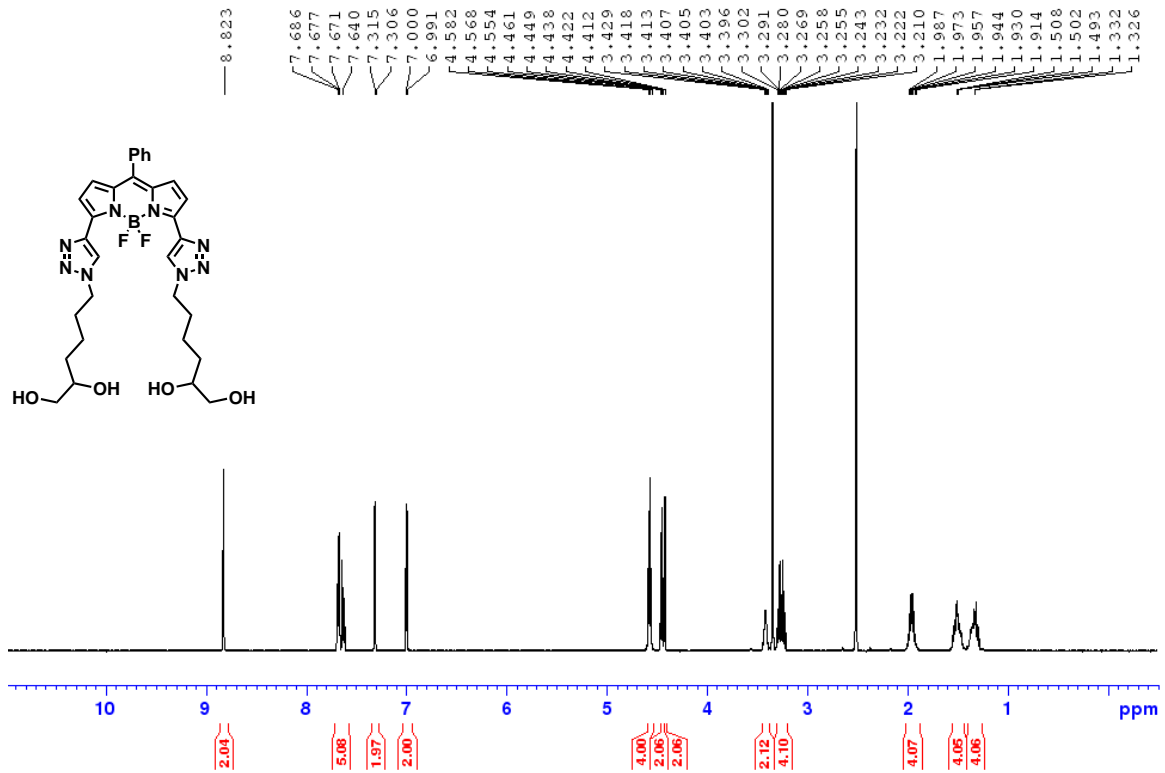

**<sup>13</sup>C NMR spectrum (100 MHz) of 5 in DMSO-d<sub>6</sub>**

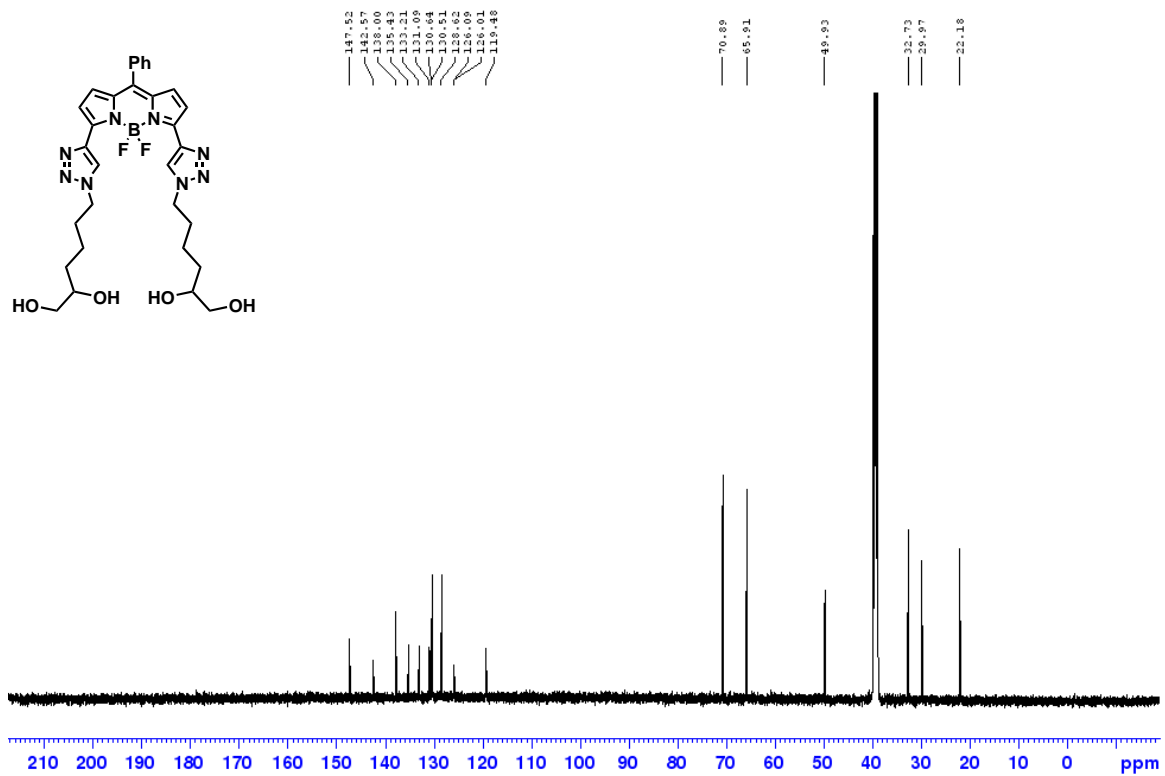

<sup>19</sup>F NMR spectrum (160 MHz) of 5 in DMSO-d<sub>6</sub>

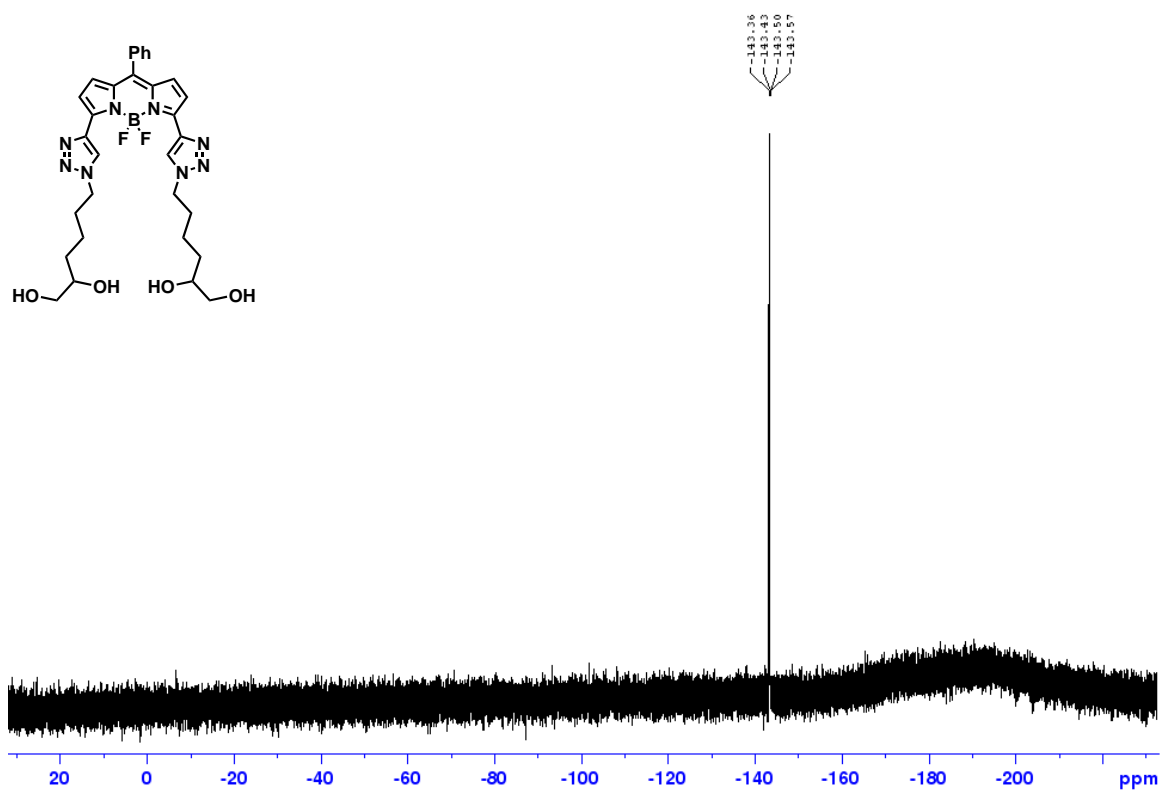



<sup>1</sup>H NMR spectrum (400 MHz) of 6 in D<sub>2</sub>O

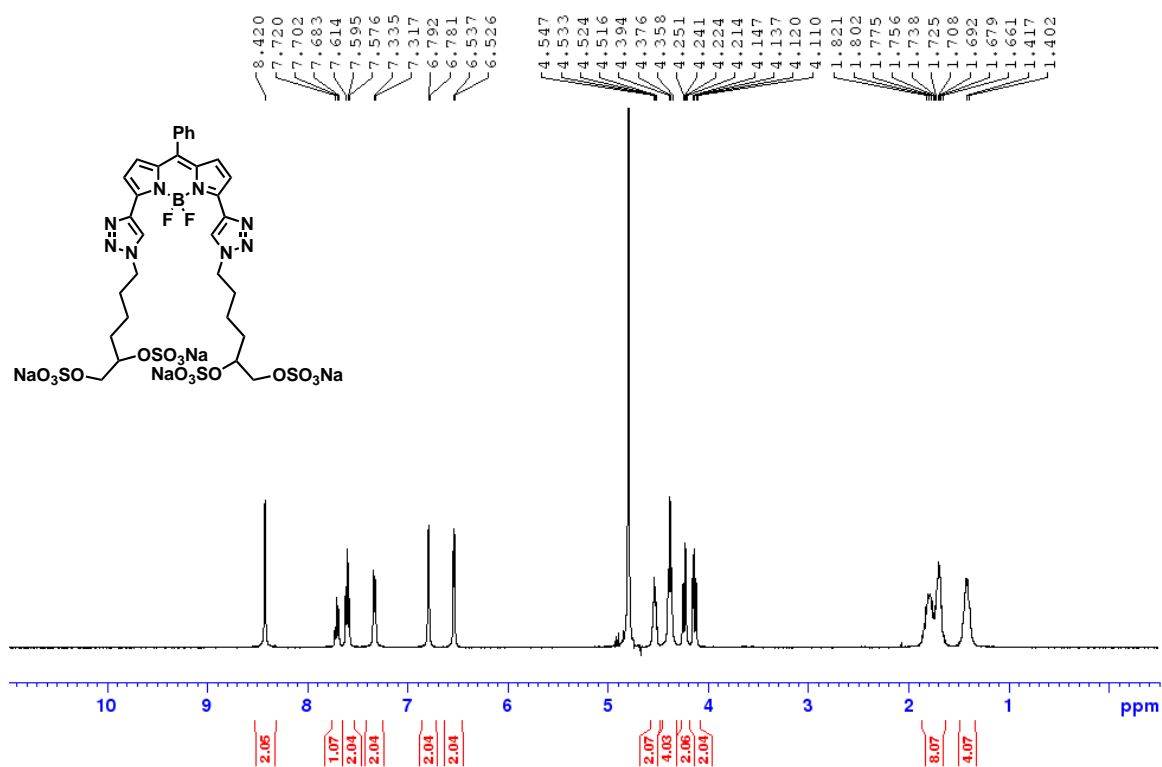

<sup>13</sup>C NMR spectrum (100 MHz) of 6 in D<sub>2</sub>O

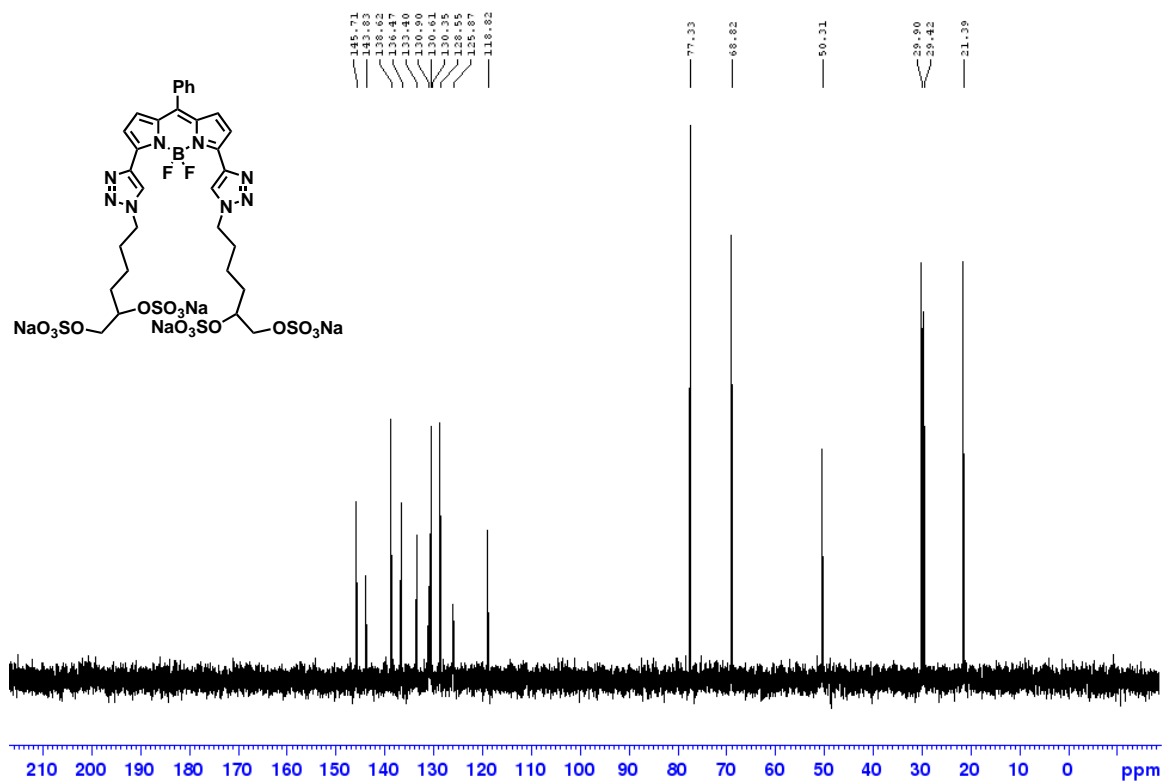

**<sup>19</sup>F NMR spectrum (160 MHz) of 6 in D<sub>2</sub>O**

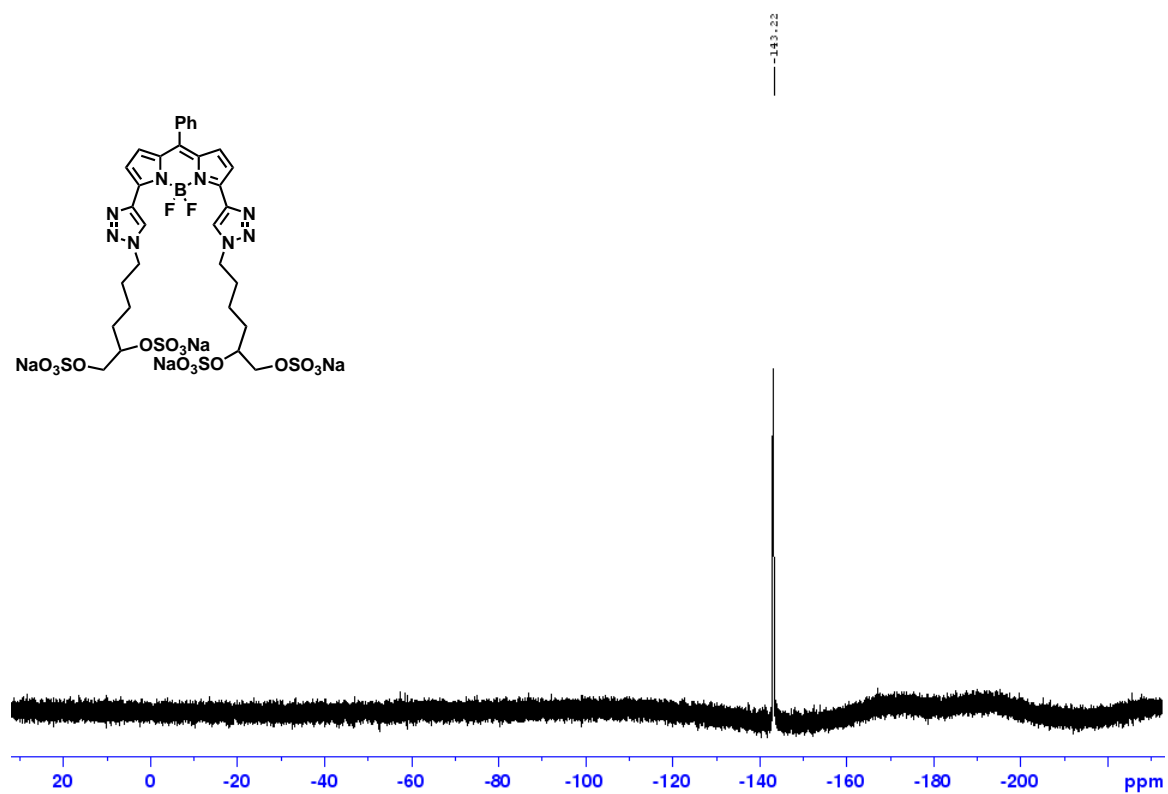

**HRMS Data**

Std1

CENTRE COMMUN DE SPECTROMETRIE DE MASSE

Analysis Info

Analysis Name QTOF\_150706\_04\_CG-Std1.d  
 Method MS\_inf\_TL\_50\_1000\_2014\_woCollSweep\_Pos\_CCSM.m  
 Comment Acquisition Date 7/6/2015 11:51:08 AM  
 Instrument / Ser# micrOTOF-Q II 10231

Acquisition Parameter

|             |            |                       |           |                  |           |
|-------------|------------|-----------------------|-----------|------------------|-----------|
| Source Type | ESI        | Ion Polarity          | Positive  | Set Nebulizer    | 0.4 Bar   |
| Focus       | Not active | Set Capillary         | 1500 V    | Set Dry Heater   | 200 °C    |
| Scan Begin  | 50 m/z     | Set End Plate Offset  | -500 V    | Set Dry Gas      | 4.0 l/min |
| Scan End    | 1000 m/z   | Set Collision Cell RF | 140.0 Vpp | Set Divert Valve | Waste     |

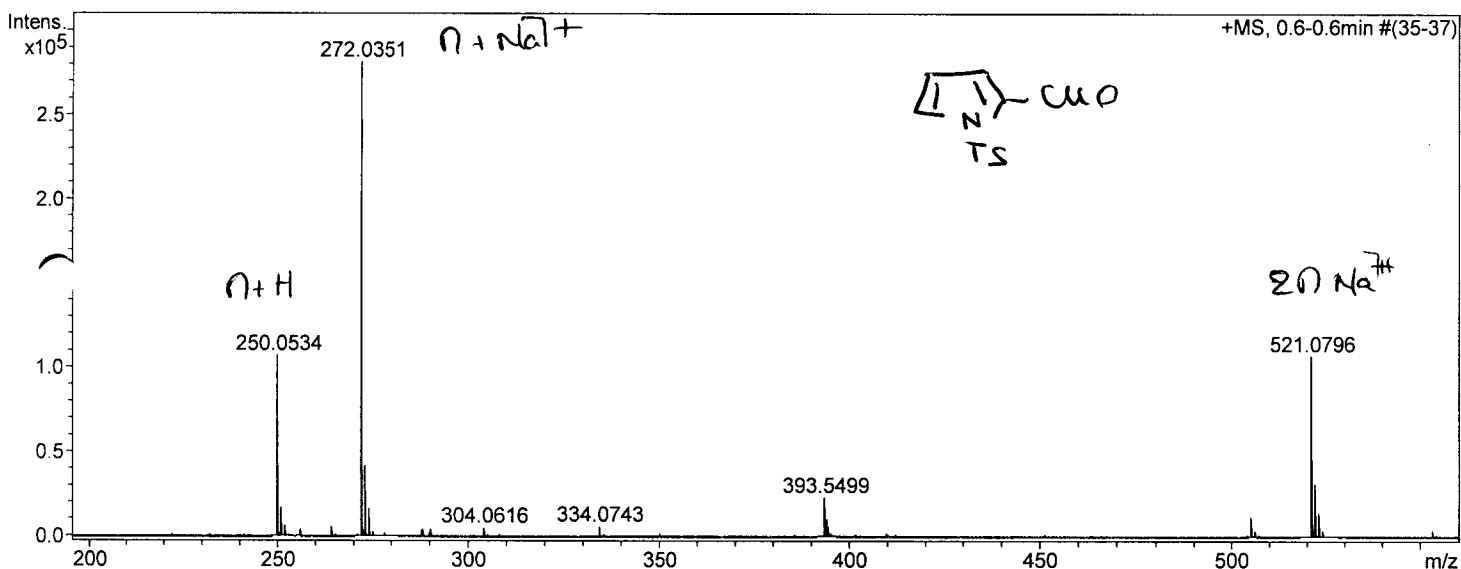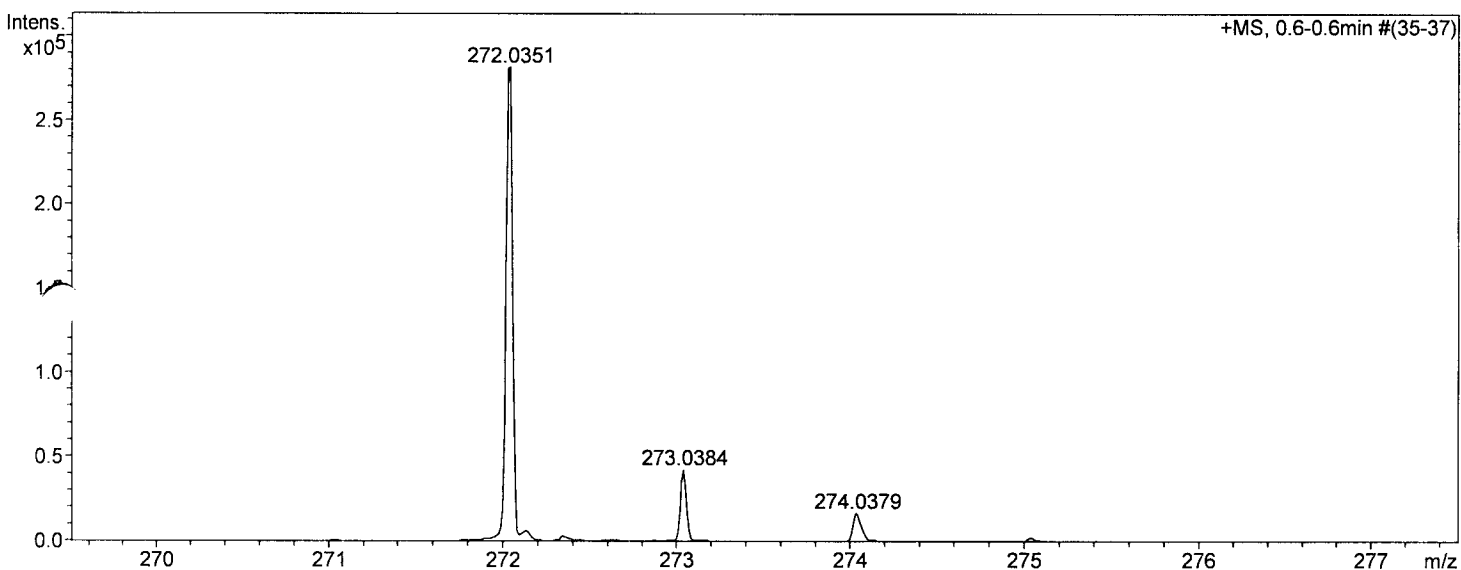

| Meas. m/z | Formula              | m/z      | err [ppm] | mSigma |
|-----------|----------------------|----------|-----------|--------|
| 272.0351  | C 12 H 11 N Na O 3 S | 272.0352 | 0.2       | 4.7    |

## CENTRE COMMUN DE SPECTROMETRIE DE MASSE

## Analysis Info

Analysis Name QTOF\_150706\_05\_CG-Std2.d

Method MS\_inf\_TL\_50\_1000\_2014\_woCollSweep\_Pos\_CCSM.m

Acquisition Date 7/6/2015 11:58:05 AM

Comment

Instrument / Ser# micrOTOF-Q II 10231

## Acquisition Parameter

|             |            |                       |           |                  |           |
|-------------|------------|-----------------------|-----------|------------------|-----------|
| Source Type | ESI        | Ion Polarity          | Positive  | Set Nebulizer    | 0.4 Bar   |
| Focus       | Not active | Set Capillary         | 1500 V    | Set Dry Heater   | 200 °C    |
| Scan Begin  | 50 m/z     | Set End Plate Offset  | -500 V    | Set Dry Gas      | 4.0 l/min |
| Scan End    | 1000 m/z   | Set Collision Cell RF | 140.0 Vpp | Set Divert Valve | Waste     |

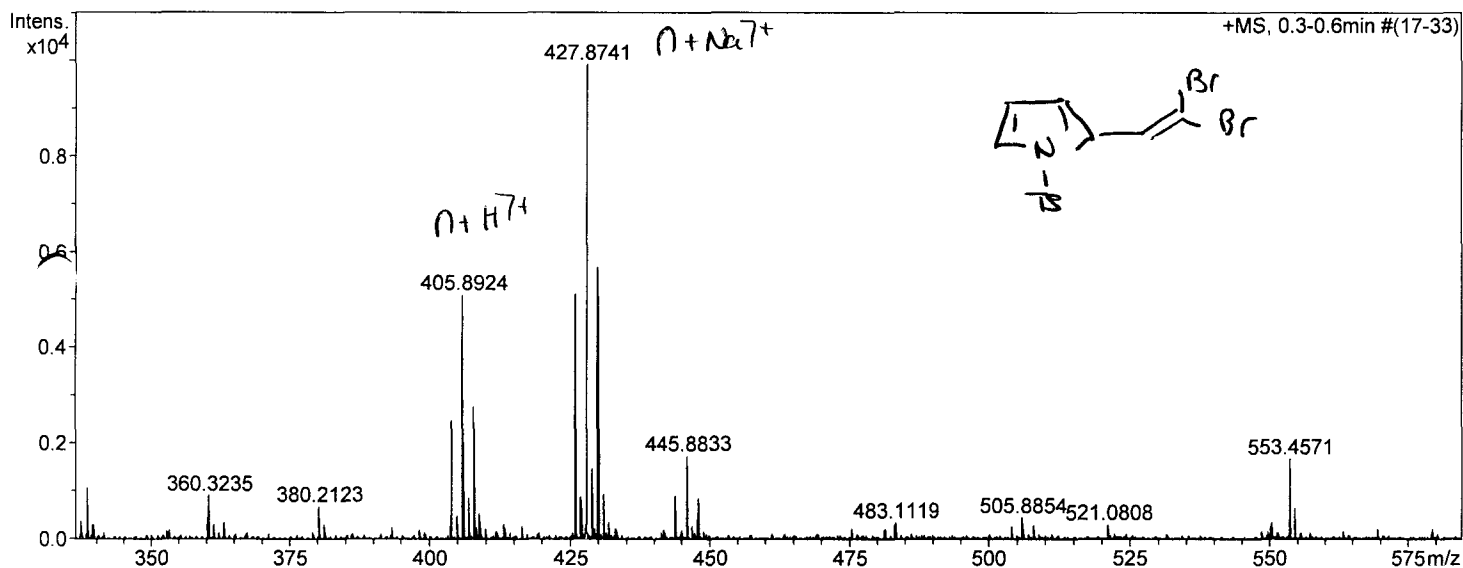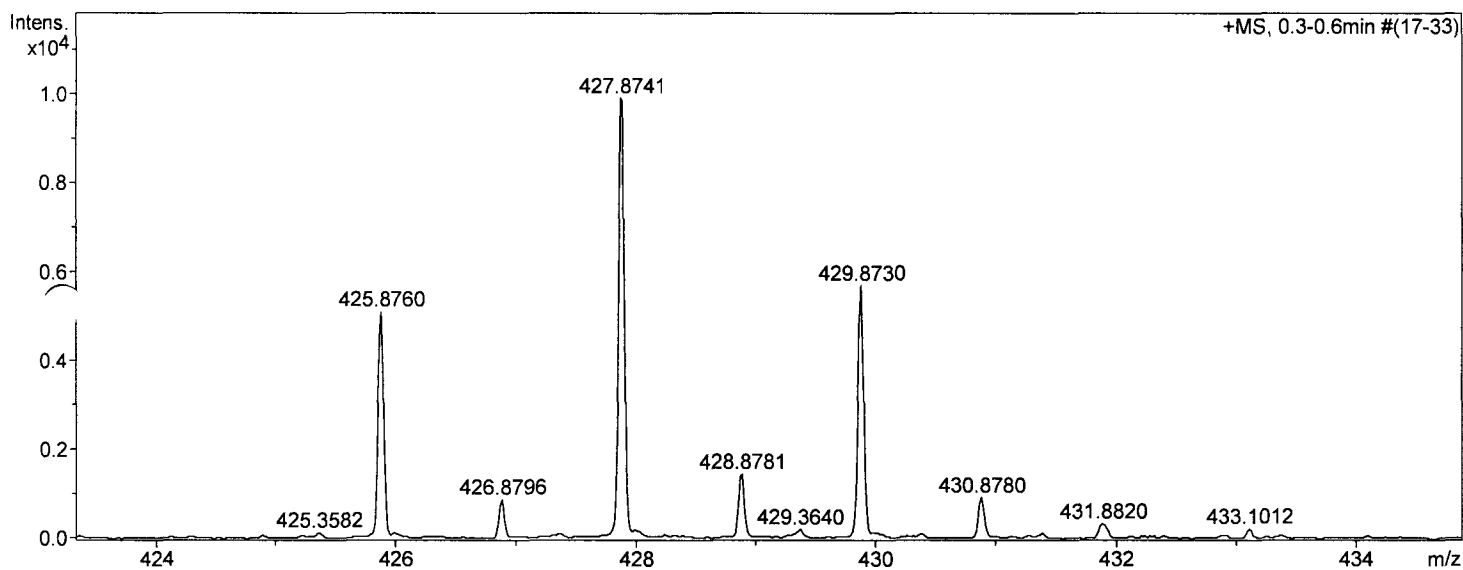

| Meas. m/z | Formula                   | m/z      | err [ppm] | mSigma |
|-----------|---------------------------|----------|-----------|--------|
| 425.8760  | C 13 H 11 Br 2 N Na O 2 S | 425.8769 | 2.3       | 19.7   |

## CENTRE COMMUN DE SPECTROMETRIE DE MASSE

## Analysis Info

Analysis Name QTOF\_150706\_06\_CG-Std3.d  
 Method MS\_inf\_TL\_50\_1000\_2014\_woCollSweep\_Pos\_CCSM.m  
 Comment  
 Acquisition Date 7/6/2015 12:03:57 PM  
 Instrument / Ser# microTOF-Q II 10231

## Acquisition Parameter

|             |            |                       |           |                  |           |
|-------------|------------|-----------------------|-----------|------------------|-----------|
| Source Type | ESI        | Ion Polarity          | Positive  | Set Nebulizer    | 0.4 Bar   |
| Focus       | Not active | Set Capillary         | 1500 V    | Set Dry Heater   | 200 °C    |
| Scan Begin  | 50 m/z     | Set End Plate Offset  | -500 V    | Set Dry Gas      | 4.0 l/min |
| Scan End    | 1000 m/z   | Set Collision Cell RF | 140.0 Vpp | Set Divert Valve | Waste     |

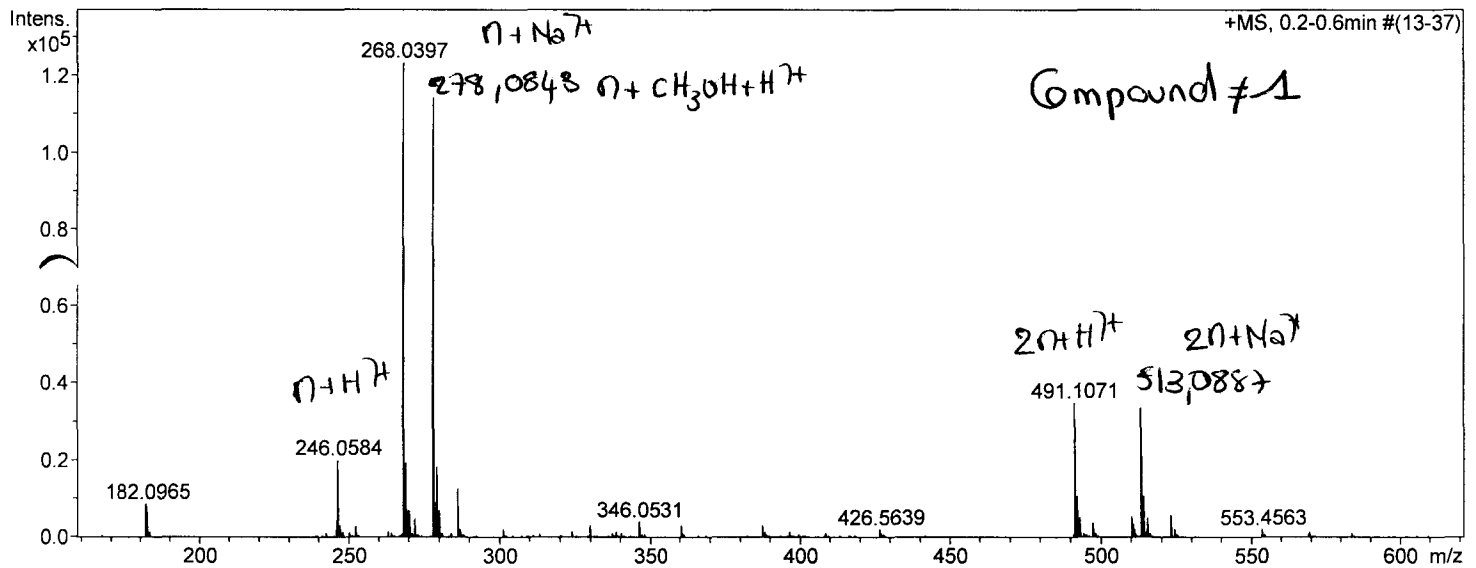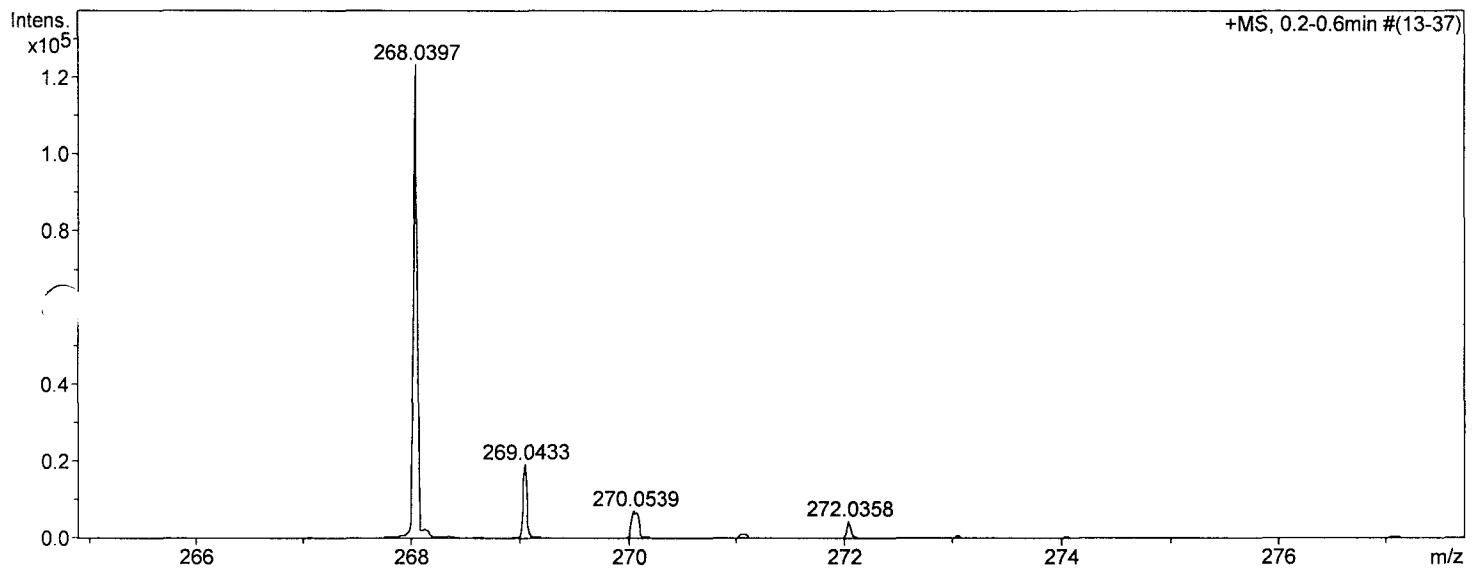

| Meas. m/z | Formula              | m/z      | err [ppm] | mSigma |
|-----------|----------------------|----------|-----------|--------|
| 268.0397  | C 13 H 11 N Na O 2 S | 268.0403 | 2.3       | 2.6    |

Std42

CENTRE COMMUN DE SPECTROMETRIE DE MASSE

Analysis Info

Analysis Name QTOF\_140121\_03\_CB1-70purif.d  
Method MS\_inf\_TL\_50\_1000\_Pos\_CCSM\_2.m  
Comment

Acquisition Date 1/21/2014 9:38:52 AM  
Instrument / Ser# micrOTOF-Q II 10231

Acquisition Parameter

|             |            |                       |          |                  |           |
|-------------|------------|-----------------------|----------|------------------|-----------|
| Source Type | ESI        | Ion Polarity          | Positive | Set Nebulizer    | 0.6 Bar   |
| Focus       | Not active | Set Capillary         | 1500 V   | Set Dry Heater   | 200 °C    |
| Scan Begin  | 50 m/z     | Set End Plate Offset  | -500 V   | Set Dry Gas      | 4.0 l/min |
| Scan End    | 1000 m/z   | Set Collision Cell RF | 50.0 Vpp | Set Divert Valve | Waste     |

masse exacte théorique (M+H): 373,1698

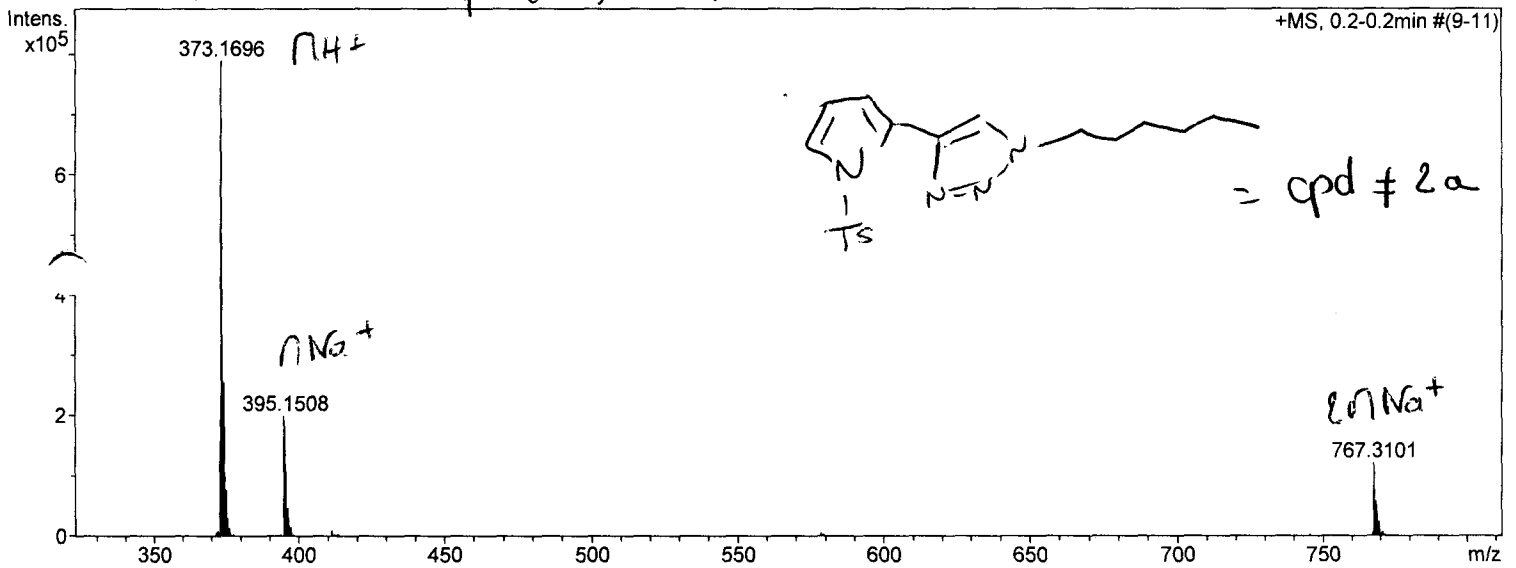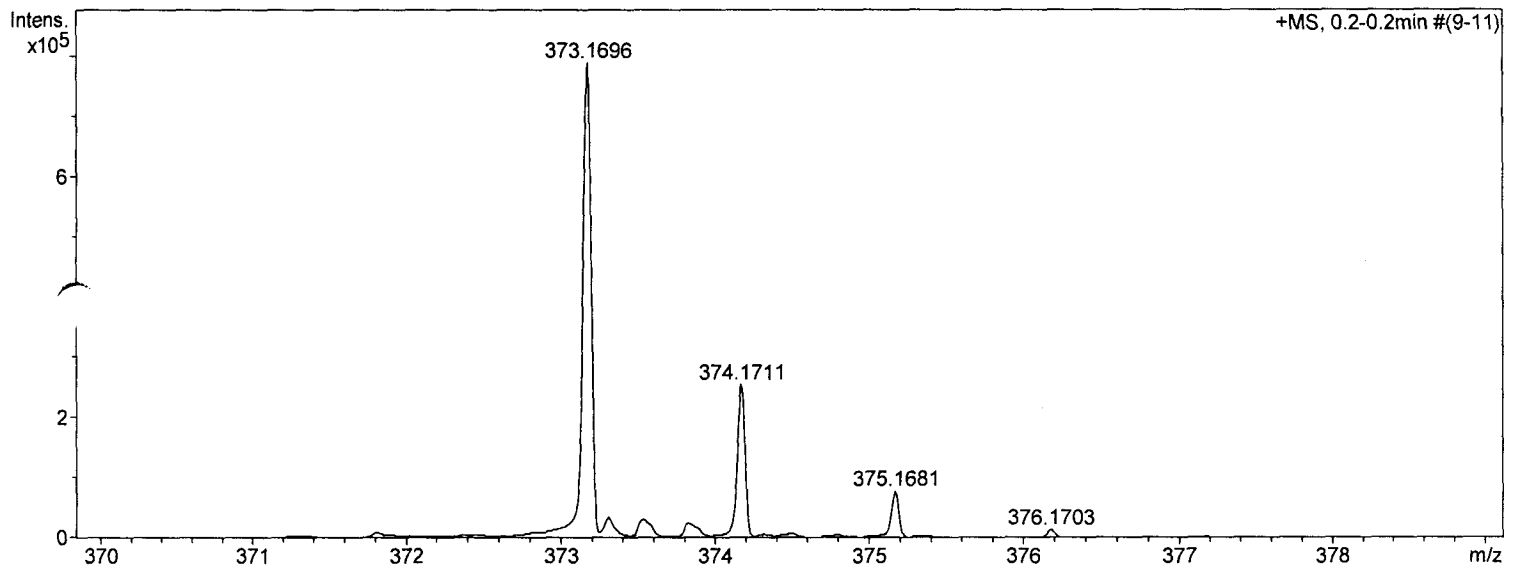

| Meas. m/z | Formula             | m/z      | err [ppm] | mSigma |
|-----------|---------------------|----------|-----------|--------|
| 373.1696  | C 19 H 25 N 4 O 2 S | 373.1693 | -1.0      | 48.3   |

## CENTRE COMMUN DE SPECTROMETRIE DE MASSE

## Analysis Info

Analysis Name QTOF\_140124\_09\_CG1-72 PURIF.d  
 Method MS\_inf\_TL\_50\_1000\_Pos\_CCSM\_2.m  
 Comment

Acquisition Date 1/24/2014 10:11:58 AM  
 Instrument / Ser# microTOF-Q II 10231

## Acquisition Parameter

|             |            |                       |          |                  |           |
|-------------|------------|-----------------------|----------|------------------|-----------|
| Source Type | ESI        | Ion Polarity          | Positive | Set Nebulizer    | 0.6 Bar   |
| Focus       | Not active | Set Capillary         | 1700 V   | Set Dry Heater   | 200 °C    |
| Scan Begin  | 50 m/z     | Set End Plate Offset  | -500 V   | Set Dry Gas      | 4.0 l/min |
| Scan End    | 1000 m/z   | Set Collision Cell RF | 50.0 Vpp | Set Divert Valve | Waste     |

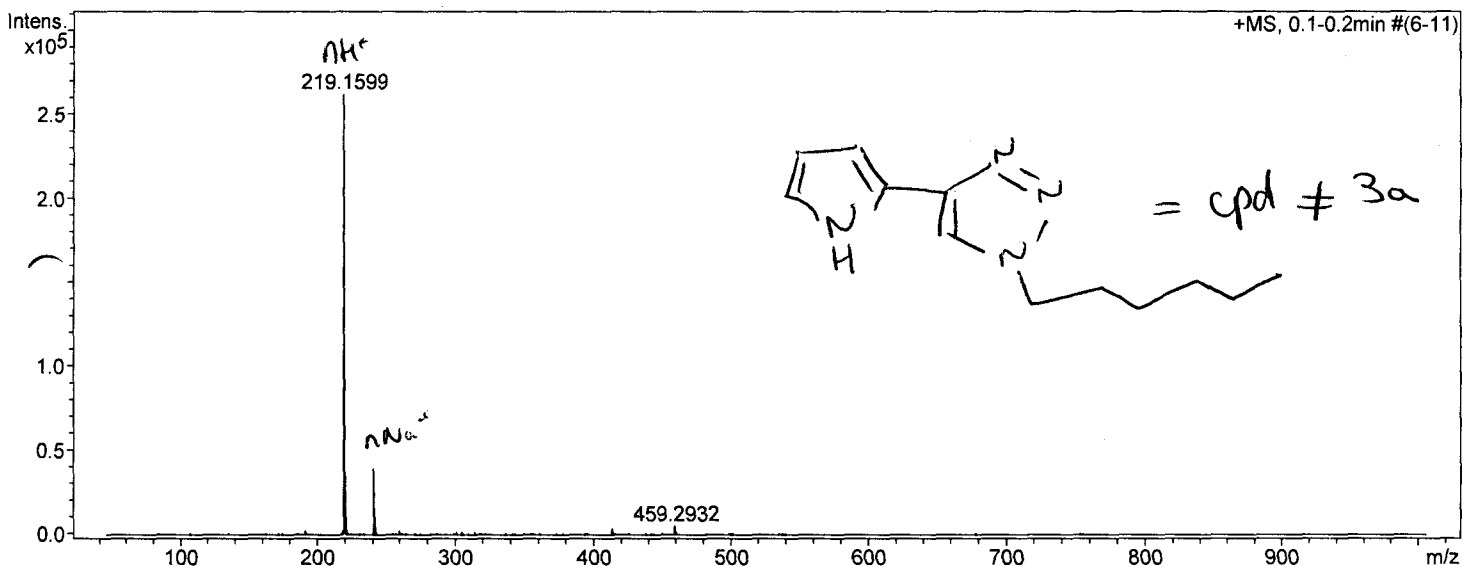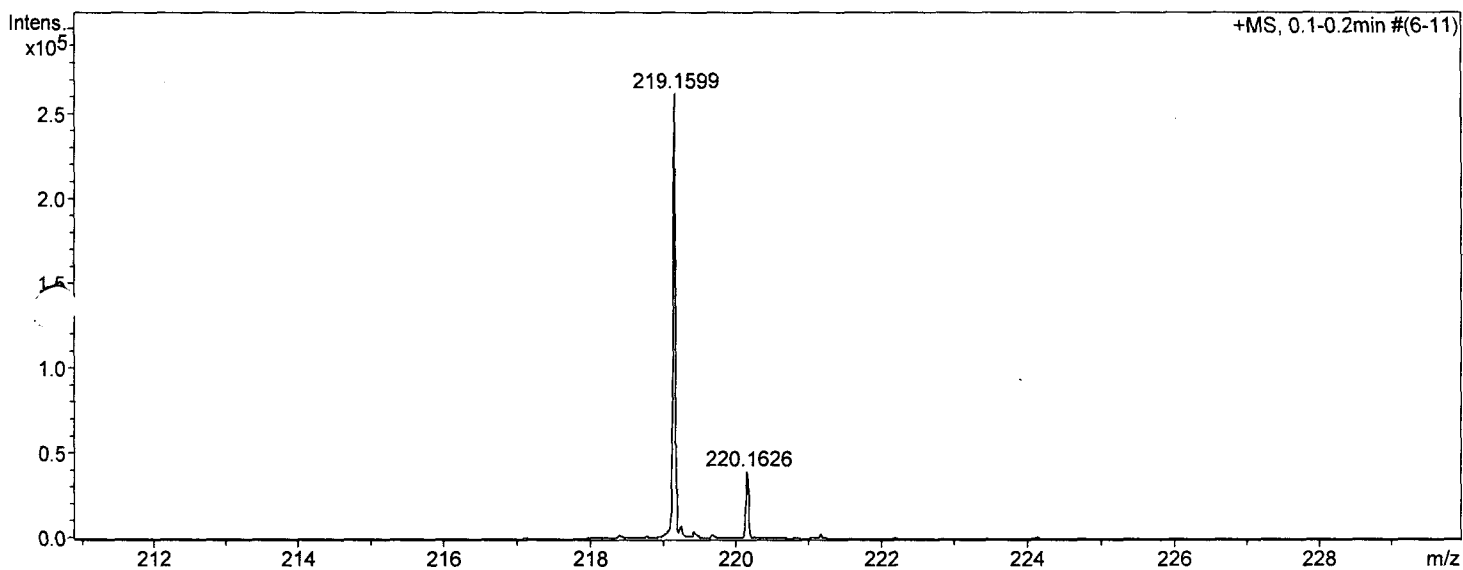

| Meas. m/z | Formula       | m/z      | err [ppm] | mSigma |
|-----------|---------------|----------|-----------|--------|
| 219.1599  | C 12 H 19 N 4 | 219.1604 | 2.5       | 4.2    |

Std 62

CENTRE COMMUN DE SPECTROMETRIE DE MASSE

Analysis Info

Analysis Name QTOF\_140203\_02\_CG1-77PURIF.d  
 Method MS\_inf\_TL\_50\_1000\_Pos\_CCSM\_2.m  
 Comment

Acquisition Date 2/3/2014 8:59:46 AM  
 Instrument / Ser# micrOTOF-Q II 10231

Acquisition Parameter

|             |            |                       |          |                  |           |
|-------------|------------|-----------------------|----------|------------------|-----------|
| Source Type | ESI        | Ion Polarity          | Positive | Set Nebulizer    | 0.6 Bar   |
| Focus       | Not active | Set Capillary         | 1200 V   | Set Dry Heater   | 200 °C    |
| Scan Begin  | 50 m/z     | Set End Plate Offset  | -500 V   | Set Dry Gas      | 4.0 l/min |
| Scan End    | 1000 m/z   | Set Collision Cell RF | 50.0 Vpp | Set Divert Valve | Waste     |

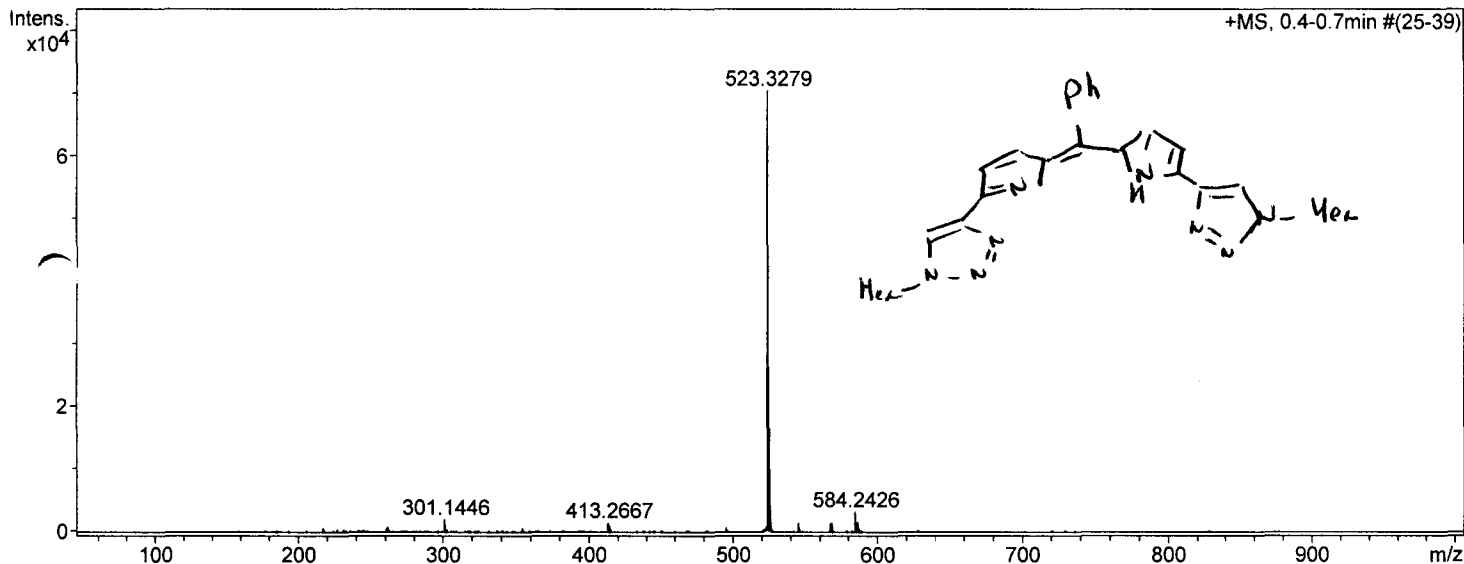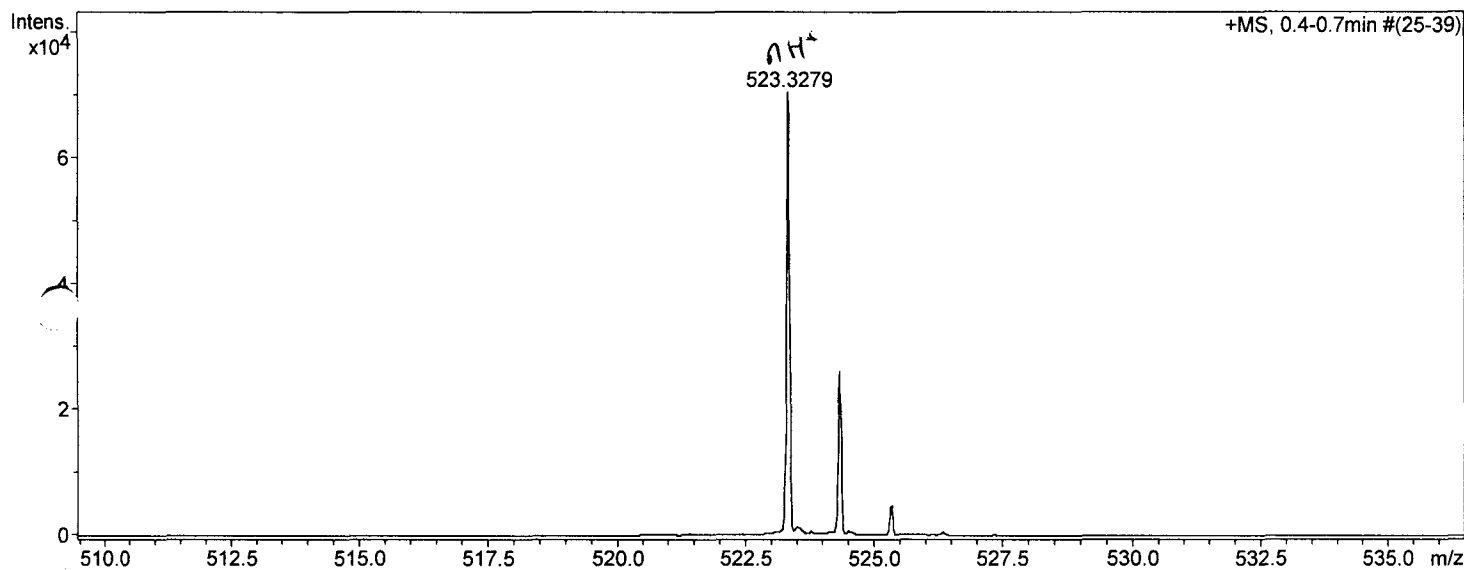

| Meas. m/z | Formula       | m/z      | err [ppm] | mSigma |
|-----------|---------------|----------|-----------|--------|
| 523.3279  | C 31 H 39 N 8 | 523.3292 | 2.6       | 2.1    |



Std 72

# CENTRE COMMUN DE SPECTROMETRIE DE MASSE

## Analysis Info

Analysis Name QTOF\_140207\_05\_CG1-81PURIF F1.d  
Method MS\_inf\_TL\_50\_1000\_Pos\_CCSM\_2.m  
Comment

Acquisition Date 2/7/2014 10:20:10 AM  
Instrument / Ser# micrOTOF-Q II 10231

## Acquisition Parameter

|             |            |                       |          |                  |           |
|-------------|------------|-----------------------|----------|------------------|-----------|
| Source Type | ESI        | Ion Polarity          | Positive | Set Nebulizer    | 0.6 Bar   |
| Focus       | Not active | Set Capillary         | 1500 V   | Set Dry Heater   | 200 °C    |
| Scan Begin  | 50 m/z     | Set End Plate Offset  | -500 V   | Set Dry Gas      | 4.0 l/min |
| Scan End    | 1000 m/z   | Set Collision Cell RF | 50.0 Vpp | Set Divert Valve | Waste     |

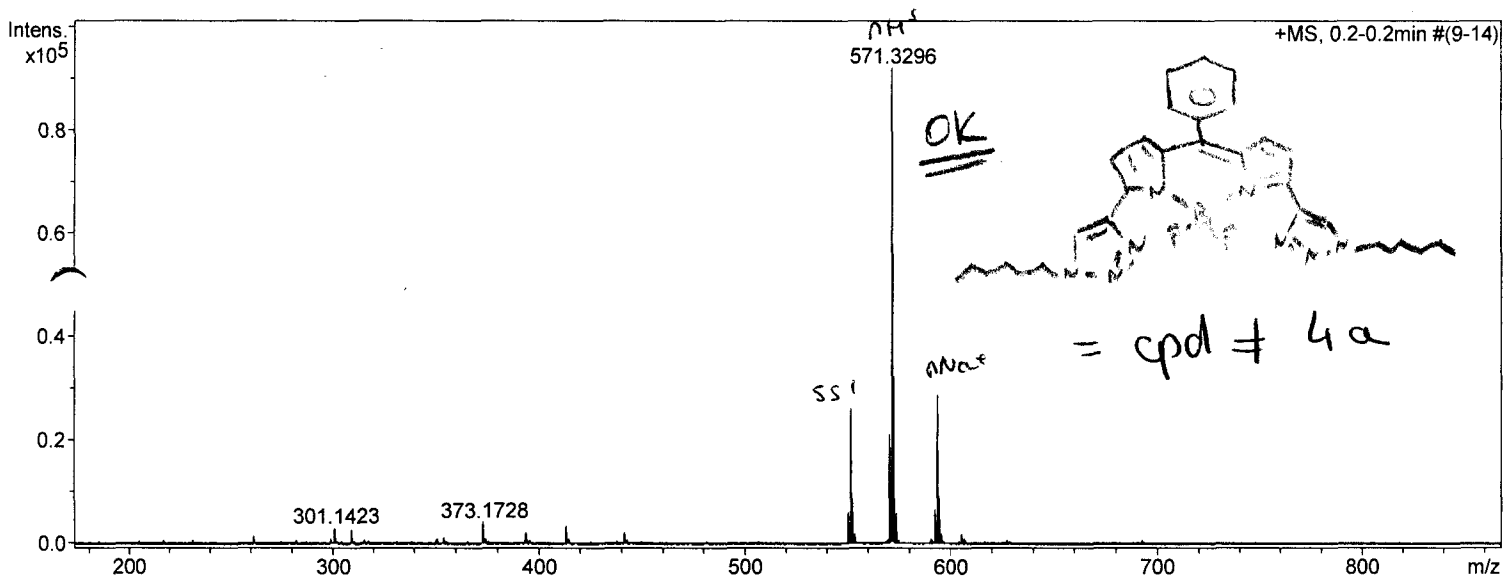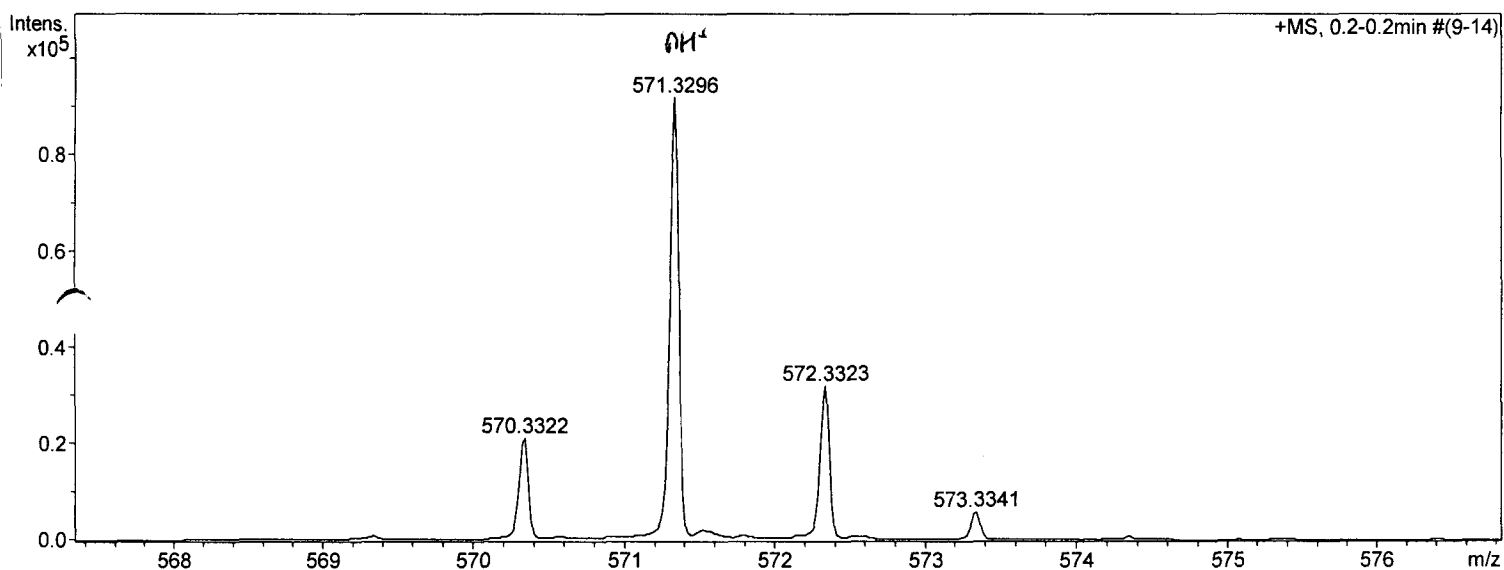

| Meas. m/z | Formula             | m/z      | err [ppm] | mSigma |
|-----------|---------------------|----------|-----------|--------|
| 571.3296  | C 31 H 38 B F 2 N 8 | 571.3280 | -2.7      | 2.4    |

## CENTRE COMMUN DE SPECTROMETRIE DE MASSE

## Analysis Info

Analysis Name QTOF\_140327\_12\_CG-STD45.d  
 Method MS\_inf\_TL\_50\_1000\_Pos\_CCSM\_2.m  
 Comment

Acquisition Date 3/27/2014 1:57:06 PM  
 Instrument / Ser# micrOTOF-Q II 10231

## Acquisition Parameter

|             |            |                       |          |                  |           |
|-------------|------------|-----------------------|----------|------------------|-----------|
| Source Type | ESI        | Ion Polarity          | Positive | Set Nebulizer    | 0.6 Bar   |
| Focus       | Not active | Set Capillary         | 1200 V   | Set Dry Heater   | 200 °C    |
| Scan Begin  | 50 m/z     | Set End Plate Offset  | -500 V   | Set Dry Gas      | 4.0 l/min |
| Scan End    | 1000 m/z   | Set Collision Cell RF | 50.0 Vpp | Set Divert Valve | Waste     |

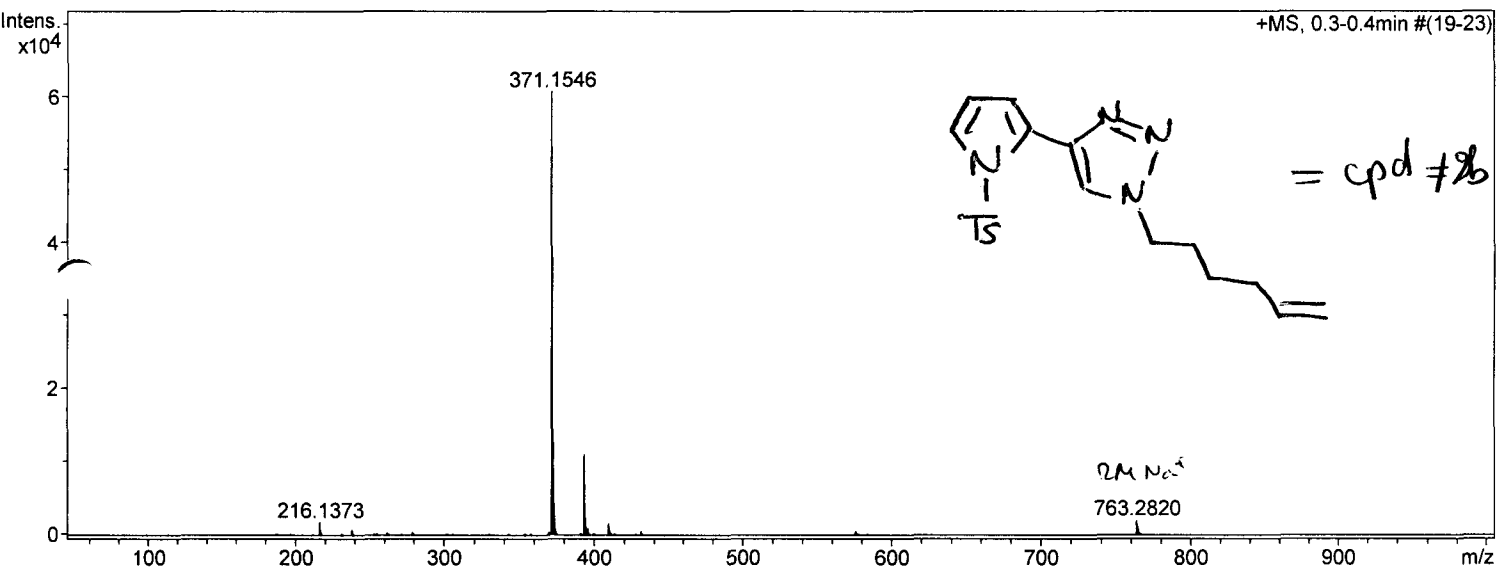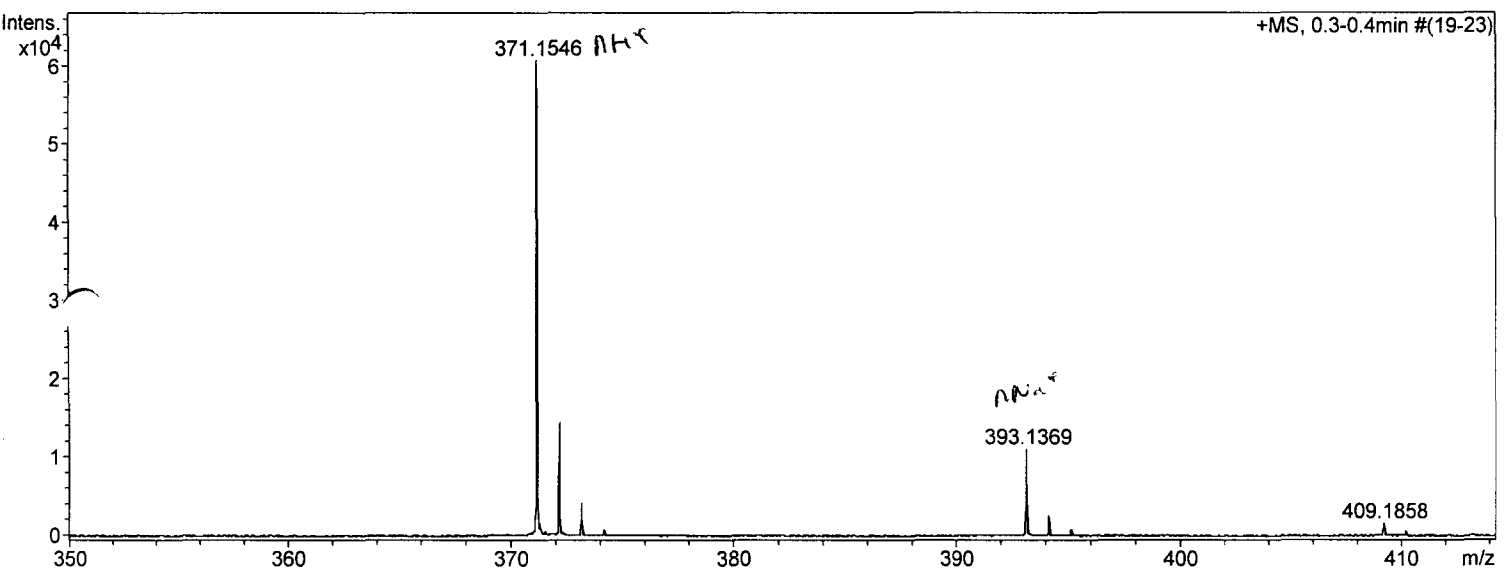

| Meas. m/z | Formula                                                         | m/z      | err [ppm] | mSigma |
|-----------|-----------------------------------------------------------------|----------|-----------|--------|
| 371.1546  | C <sub>19</sub> H <sub>23</sub> N <sub>4</sub> O <sub>2</sub> S | 371.1536 | -2.5      | 5.5    |

Std55

# CENTRE COMMUN DE SPECTROMETRIE DE MASSE

## Analysis Info

Analysis Name QTOF\_140410\_03\_CG-STD55.d  
Method MS\_inf\_TL\_50\_1000\_Pos\_CCSM\_2.m  
Comment

Acquisition Date 4/10/2014 9:30:40 AM  
Instrument / Ser# micrOTOF-Q II 10231

## Acquisition Parameter

|             |            |                       |          |                  |           |
|-------------|------------|-----------------------|----------|------------------|-----------|
| Source Type | ESI        | Ion Polarity          | Positive | Set Nebulizer    | 0.6 Bar   |
| Focus       | Not active | Set Capillary         | 1500 V   | Set Dry Heater   | 200 °C    |
| Scan Begin  | 50 m/z     | Set End Plate Offset  | -500 V   | Set Dry Gas      | 4.0 l/min |
| Scan End    | 1000 m/z   | Set Collision Cell RF | 50.0 Vpp | Set Divert Valve | Waste     |

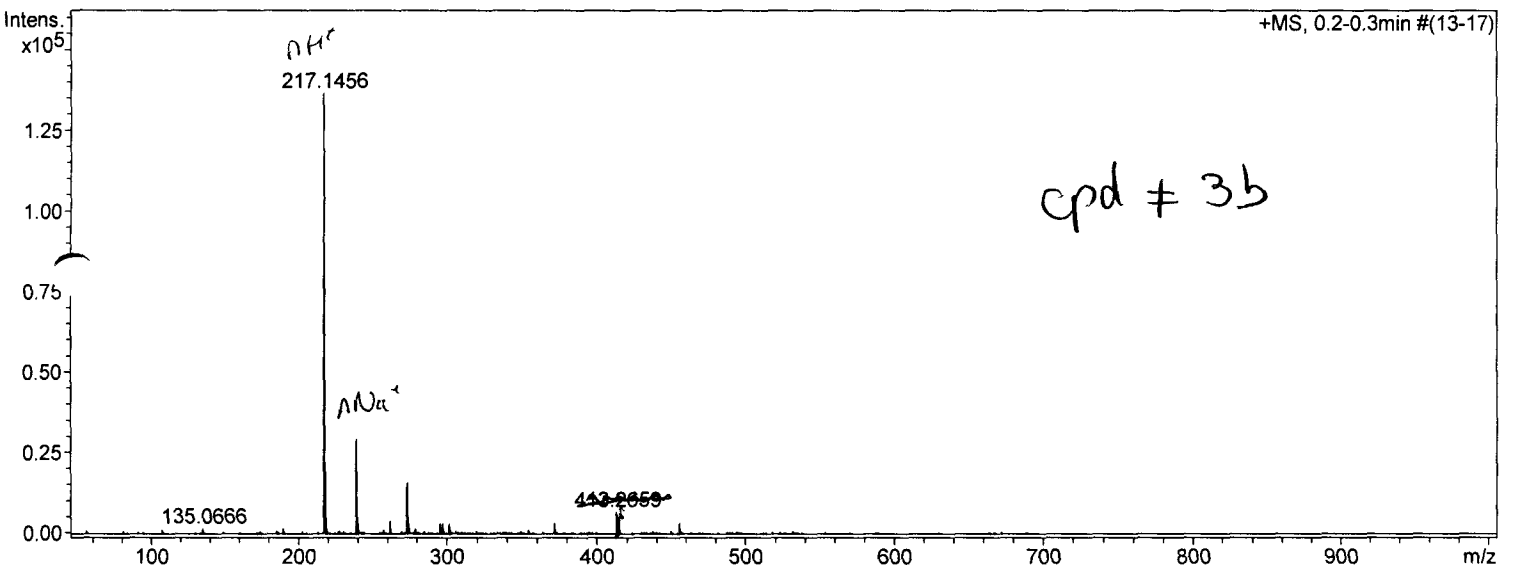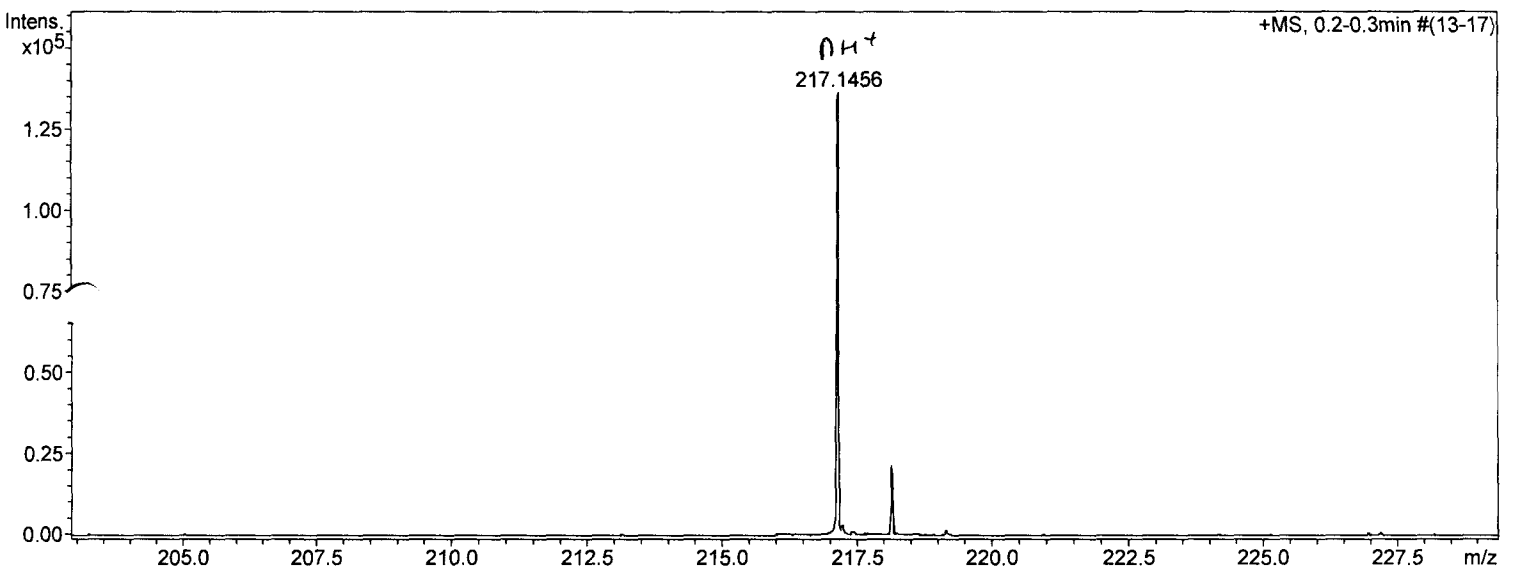

| Meas. m/z | Formula       | m/z      | err [ppm] | mSigma |
|-----------|---------------|----------|-----------|--------|
| 217.1456  | C 12 H 17 N 4 | 217.1448 | -3.7      | 7.9    |

## CENTRE COMMUN DE SPECTROMETRIE DE MASSE

## Analysis Info

Analysis Name QTOF\_140407\_01\_CG-STD65.d  
 Method MS\_inf\_TL\_50\_1000\_Pos\_CCSM\_2.m  
 Comment

Acquisition Date 4/7/2014 8:51:41 AM  
 Instrument / Ser# micrOTOF-Q II 10231

## Acquisition Parameter

|             |            |                       |          |                  |           |
|-------------|------------|-----------------------|----------|------------------|-----------|
| Source Type | ESI        | Ion Polarity          | Positive | Set Nebulizer    | 0.6 Bar   |
| Focus       | Not active | Set Capillary         | 1500 V   | Set Dry Heater   | 200 °C    |
| Scan Begin  | 50 m/z     | Set End Plate Offset  | -500 V   | Set Dry Gas      | 4.0 l/min |
| Scan End    | 1000 m/z   | Set Collision Cell RF | 50.0 Vpp | Set Divert Valve | Waste     |

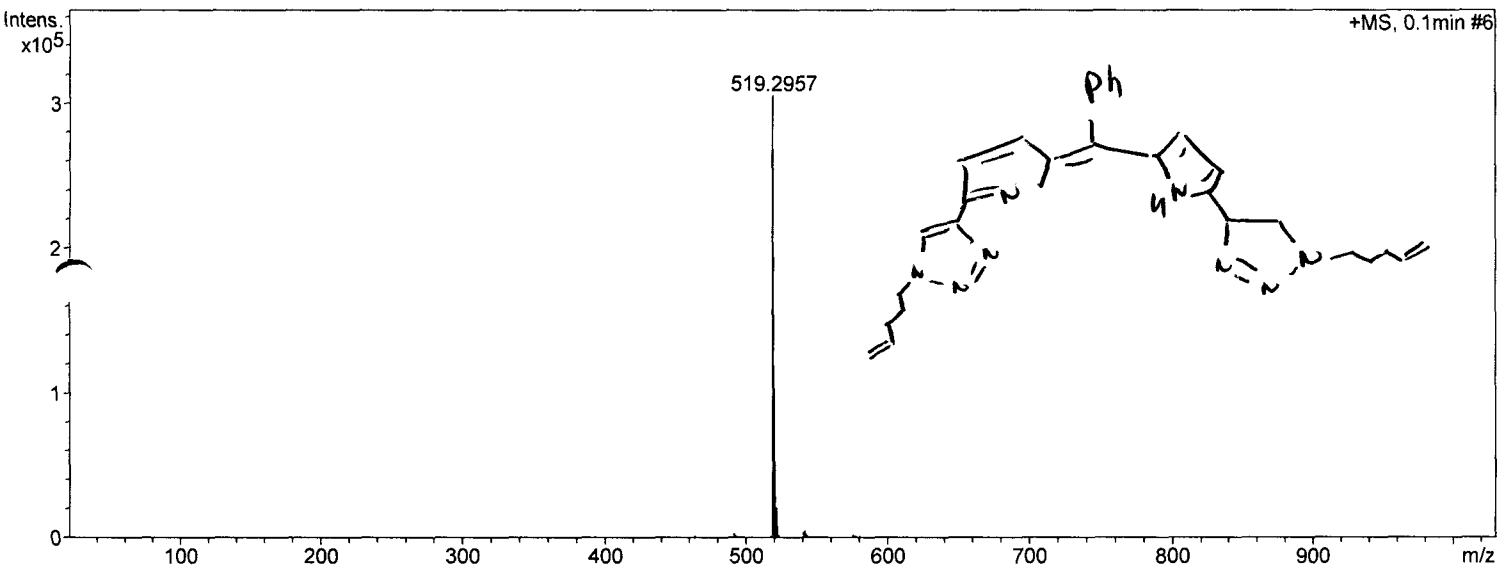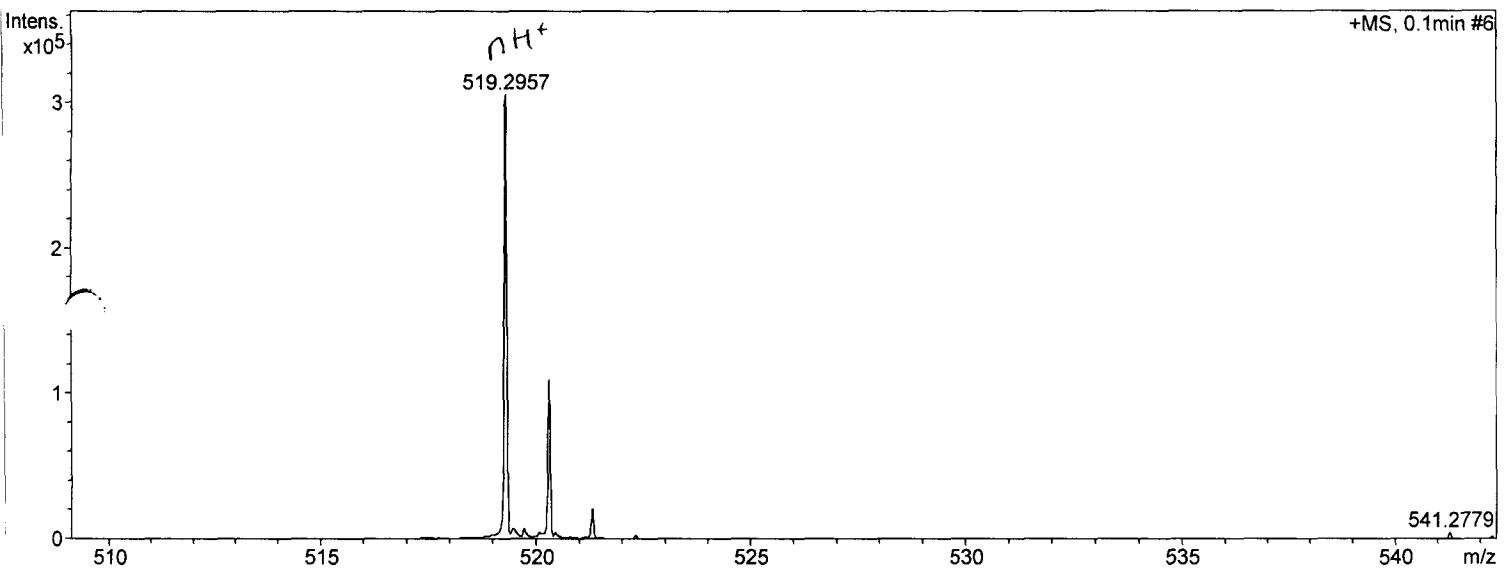

| Meas. m/z | Formula       | m/z      | err [ppm] | mSigma |
|-----------|---------------|----------|-----------|--------|
| 519.2957  | C 31 H 35 N 8 | 519.2979 | 4.3       | 5.1    |

CENTRE COMMUN DE SPECTROMETRIE DE MASSE

Analysis Info

Analysis Name QTOF\_140410\_06\_CG-STD75.d  
 Method MS\_inf\_TL\_50\_1000\_Pos\_CCSM\_2.m  
 Comment

Acquisition Date 4/10/2014 9:40:36 AM  
 Instrument / Ser# micrOTOF-Q II 10231

Acquisition Parameter

|             |            |                       |          |                  |           |
|-------------|------------|-----------------------|----------|------------------|-----------|
| Source Type | ESI        | Ion Polarity          | Positive | Set Nebulizer    | 0.6 Bar   |
| Focus       | Not active | Set Capillary         | 2200 V   | Set Dry Heater   | 200 °C    |
| Scan Begin  | 50 m/z     | Set End Plate Offset  | -500 V   | Set Dry Gas      | 4.0 l/min |
| Scan End    | 1000 m/z   | Set Collision Cell RF | 50.0 Vpp | Set Divert Valve | Waste     |

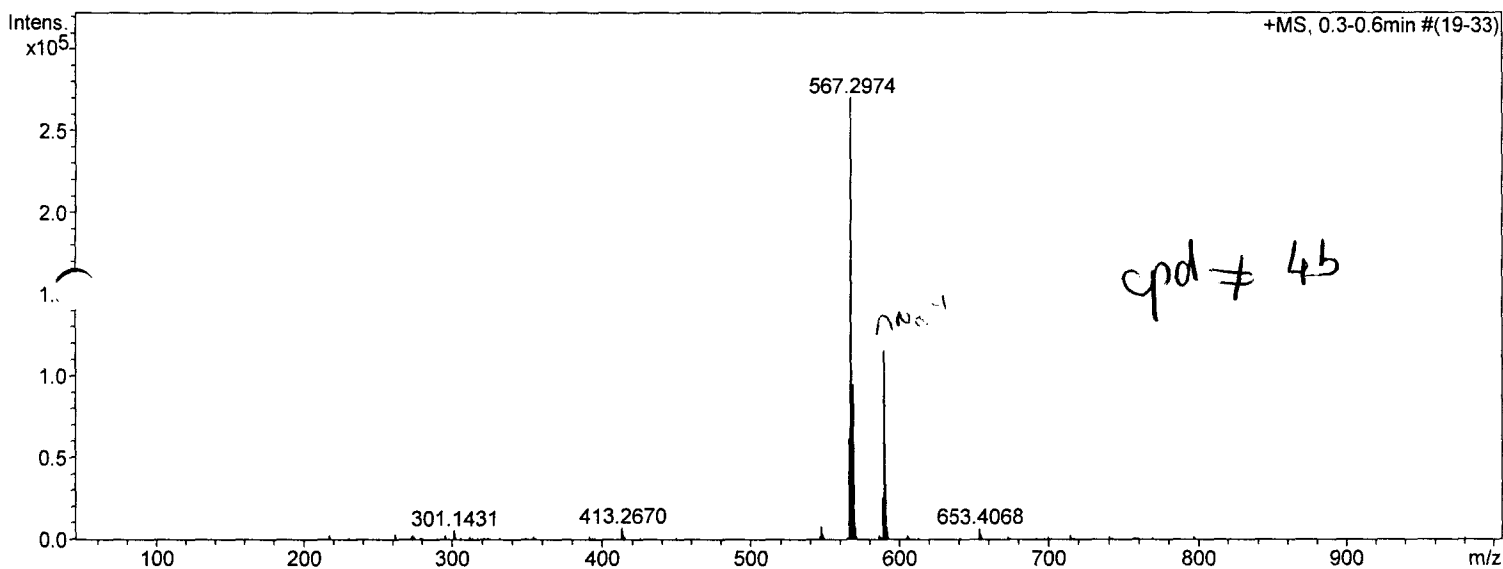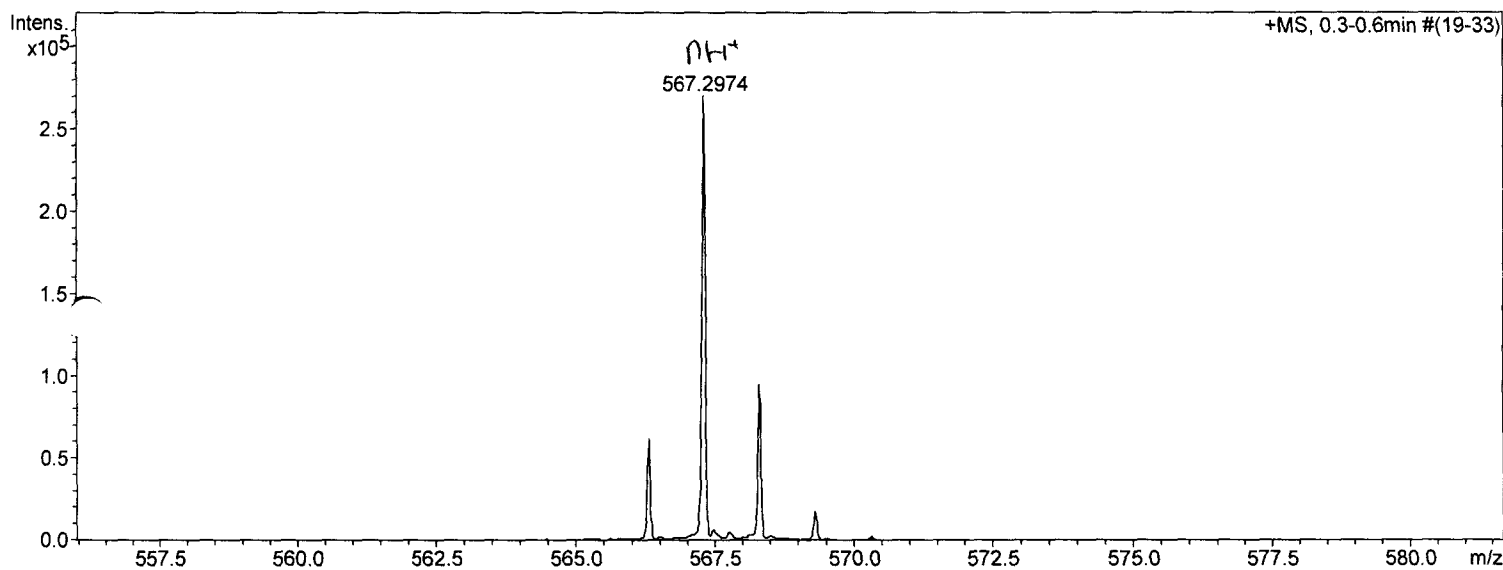

| Meas. m/z | Formula             | m/z      | err [ppm] | mSigma |
|-----------|---------------------|----------|-----------|--------|
| 567.2974  | C 31 H 34 B F 2 N 8 | 567.2967 | -1.1      | 1.8    |

propre Std85

# CENTRE COMMUN DE SPECTROMETRIE DE MASSE

## Analysis Info

Analysis Name QTOF\_140418\_20\_CG-Std85.d  
Method MS\_inf\_TL\_50\_1000\_Pos\_CCSM\_2.m  
Comment

Acquisition Date 4/18/2014 3:10:49 PM  
Instrument / Ser# micrOTOF-Q II 10231

## Acquisition Parameter

|             |            |                       |          |                  |           |
|-------------|------------|-----------------------|----------|------------------|-----------|
| Source Type | ESI        | Ion Polarity          | Positive | Set Nebulizer    | 0.6 Bar   |
| Focus       | Not active | Set Capillary         | 1500 V   | Set Dry Heater   | 200 °C    |
| Scan Begin  | 50 m/z     | Set End Plate Offset  | -500 V   | Set Dry Gas      | 4.0 l/min |
| Scan End    | 1000 m/z   | Set Collision Cell RF | 50.0 Vpp | Set Divert Valve | Waste     |

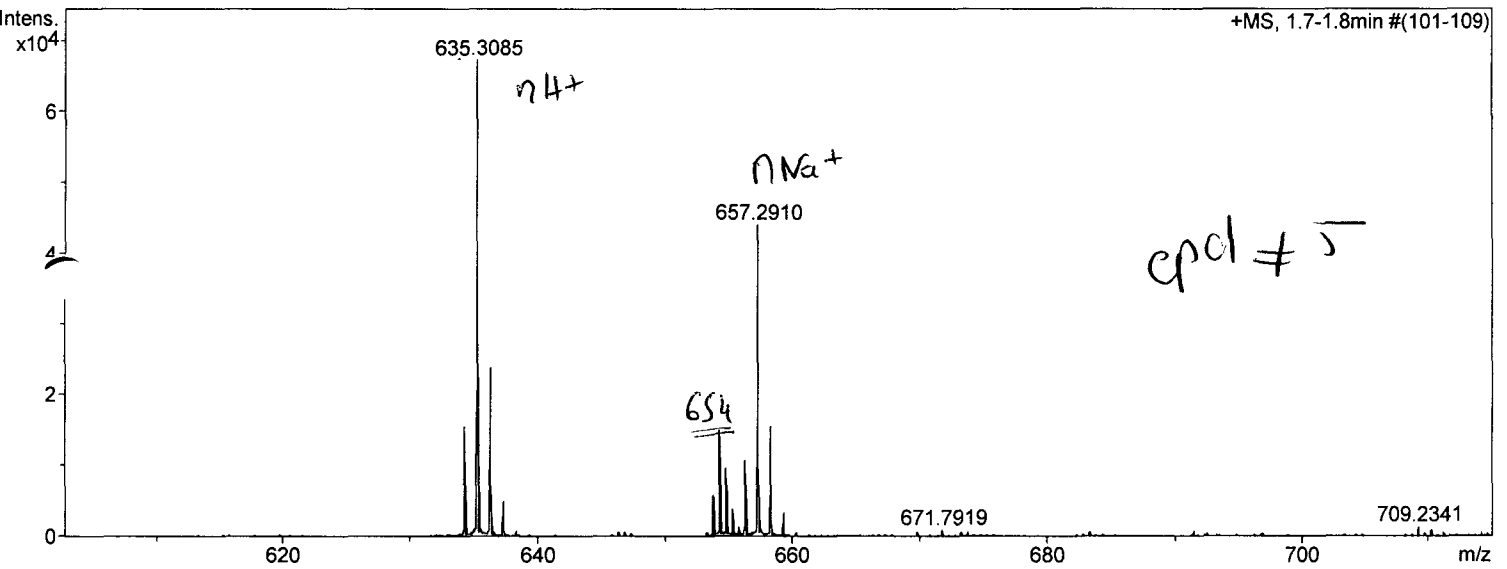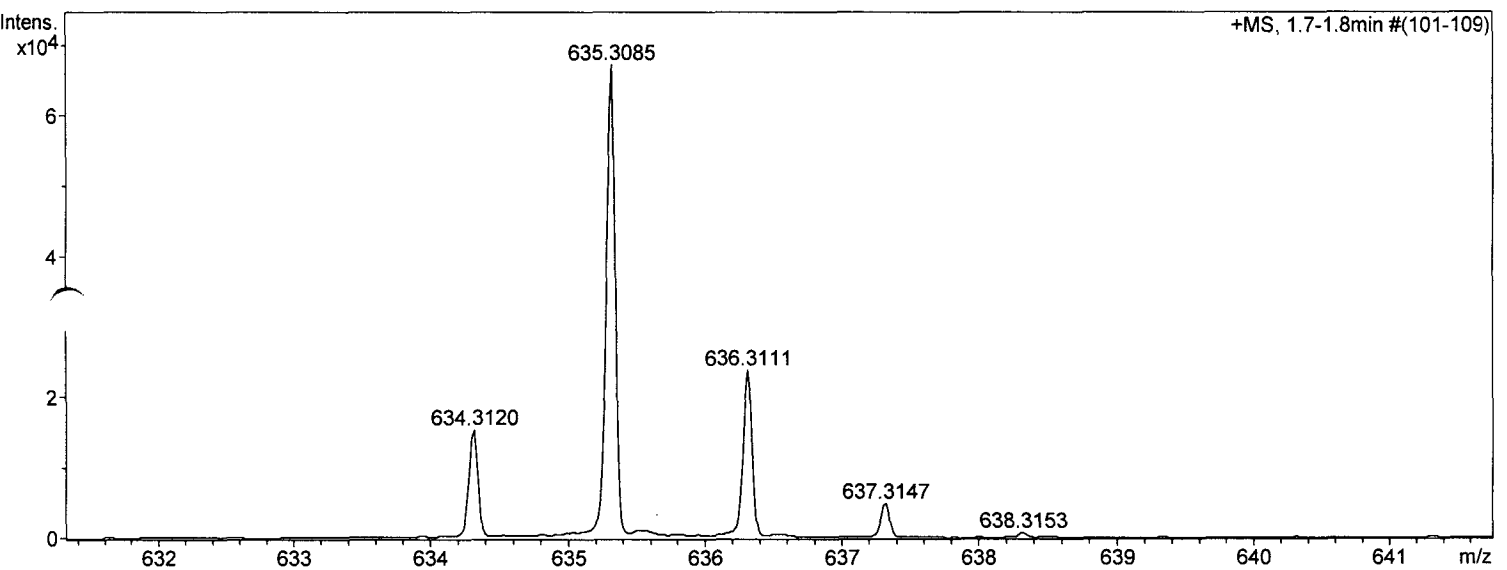

| Meas. m/z | Formula                 | m/z      | err [ppm] | mSigma |
|-----------|-------------------------|----------|-----------|--------|
| 635.3085  | C 31 H 38 B F 2 N 8 O 4 | 635.3077 | -1.3      | 2.0    |

CENTRE COMMUN DE SPECTROMETRIE DE MASSE

Analysis Info

Analysis Name QTOF\_150115\_04\_CG-Std95-Na4.d  
 Method MS\_inf\_TL\_50\_1000\_2014\_woCollSweep\_Pos\_CCSM.m  
 Comment Acquisition Date 1/15/2015 12:15:21 PM  
 Instrument / Ser# microTOF-Q II 10231

Acquisition Parameter

|             |            |                       |           |                  |           |
|-------------|------------|-----------------------|-----------|------------------|-----------|
| Source Type | ESI        | Ion Polarity          | Negative  | Set Nebulizer    | 0.4 Bar   |
| Focus       | Not active | Set Capillary         | 4000 V    | Set Dry Heater   | 200 °C    |
| Scan Begin  | 50 m/z     | Set End Plate Offset  | -500 V    | Set Dry Gas      | 4.0 l/min |
| Scan End    | 1500 m/z   | Set Collision Cell RF | 140.0 Vpp | Set Divert Valve | Waste     |

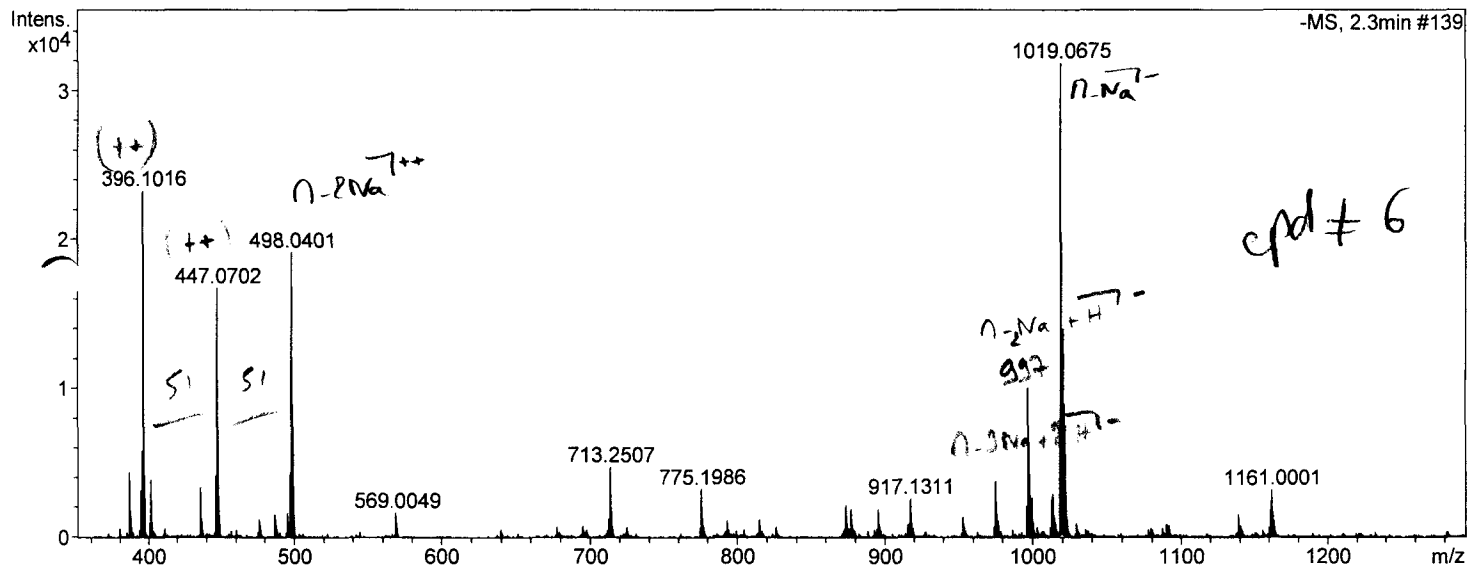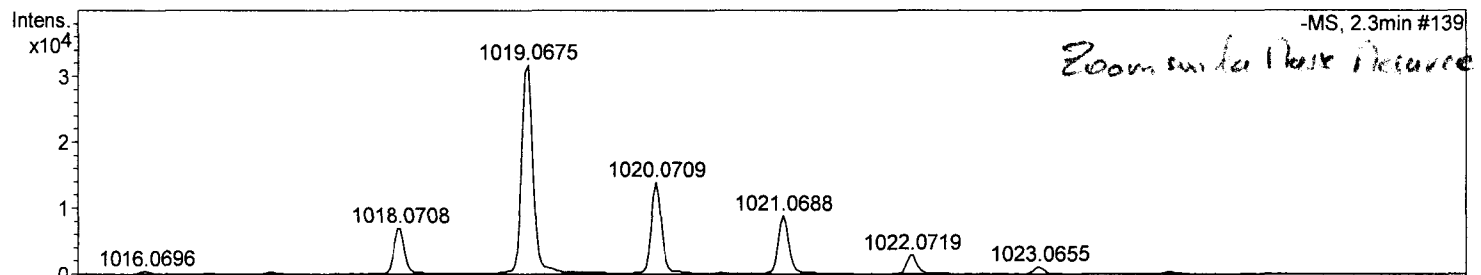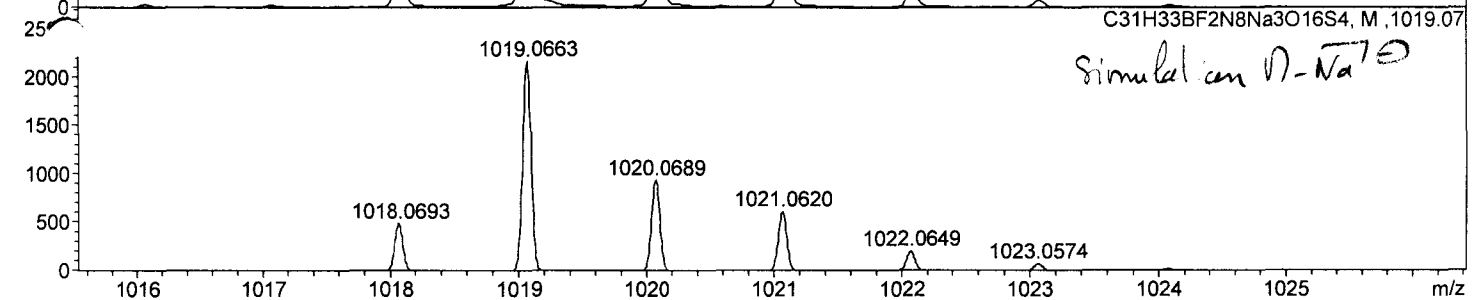

| Meas. m/z | Formula                                                                                                       | m/z       | err [ppm] | mSigma |
|-----------|---------------------------------------------------------------------------------------------------------------|-----------|-----------|--------|
| 1018.0708 | C <sub>31</sub> H <sub>33</sub> BF <sub>2</sub> N <sub>8</sub> Na <sub>3</sub> O <sub>16</sub> S <sub>4</sub> | 1019.0663 | -1.4      | 5.2    |
